# Supplementary material for: Development of a new tool for the assessment of patient-defined benefit in hospitalised older patients: the Patient Benefit Assessment Scale for Hospitalised Older Patients (P-BAS HOP)
Source: PubMed Central journal article supplement (PMC7684819; doi:10.1136/bmjopen-2020-038203), 2020-11-23
Supplement: bmjopen-2020-038203.draft_revisions.pdf [file bmjopen-2020-038203.draft_revisions.pdf]

# BMJ Open

BMJ Open is committed to open peer review. As part of this commitment we make the peer review history of every article we publish publicly available.

When an article is published we post the peer reviewers' comments and the authors' responses online. We also post the versions of the paper that were used during peer review. These are the versions that the peer review comments apply to.

The versions of the paper that follow are the versions that were submitted during the peer review process. They are not the versions of record or the final published versions. They should not be cited or distributed as the published version of this manuscript.

BMJ Open is an open access journal and the full, final, typeset and author-corrected version of record of the manuscript is available on our site with no access controls, subscription charges or pay-per-view fees (<http://bmjopen.bmj.com>).

If you have any questions on BMJ Open's open peer review process please email [info.bmjopen@bmj.com](mailto:info.bmjopen@bmj.com)

# BMJ Open

## Development of a new tool for the assessment of patient defined benefit in hospitalised older patients: the Patient Benefit Assessment Scale for Hospitalised Older Patients (P-BAS HOP)

|                               |                                                                                                                                                                                                                                                                                                                                                                                                                                                                                                                     |
|-------------------------------|---------------------------------------------------------------------------------------------------------------------------------------------------------------------------------------------------------------------------------------------------------------------------------------------------------------------------------------------------------------------------------------------------------------------------------------------------------------------------------------------------------------------|
| Journal:                      | <i>BMJ Open</i>                                                                                                                                                                                                                                                                                                                                                                                                                                                                                                     |
| Manuscript ID                 | bmjopen-2020-038203                                                                                                                                                                                                                                                                                                                                                                                                                                                                                                 |
| Article Type:                 | Original research                                                                                                                                                                                                                                                                                                                                                                                                                                                                                                   |
| Date Submitted by the Author: | 03-Mar-2020                                                                                                                                                                                                                                                                                                                                                                                                                                                                                                         |
| Complete List of Authors:     | van der Kluit, Maria; University of Groningen, University Medical Center Groningen, University Center for Geriatric Medicine<br>Dijkstra, Geke; Department of Health Sciences, Applied Health Research van Munster, Barbara; University of Groningen, University Medical Center Groningen, University Center for Geriatric Medicine; Gelre Hospitals, Geriatrics<br>De Rooij, Sophia; University Medical Center Groningen, University Center for Geriatric Medicine; Medical Spectrum Twente, Medical School Twente |
| Keywords:                     | GERIATRIC MEDICINE, QUALITATIVE RESEARCH, Quality in health care < HEALTH SERVICES ADMINISTRATION & MANAGEMENT                                                                                                                                                                                                                                                                                                                                                                                                      |
|                               |                                                                                                                                                                                                                                                                                                                                                                                                                                                                                                                     |

SCHOLARONE™  
Manuscripts

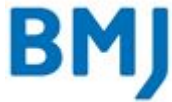

I, the Submitting Author has the right to grant and does grant on behalf of all authors of the Work (as defined in the below author licence), an exclusive licence and/or a non-exclusive licence for contributions from authors who are: i) UK Crown employees; ii) where BMJ has agreed a CC-BY licence shall apply, and/or iii) in accordance with the terms applicable for US Federal Government officers or employees acting as part of their official duties; on a worldwide, perpetual, irrevocable, royalty-free basis to BMJ Publishing Group Ltd ("BMJ") its licensees and where the relevant Journal is co-owned by BMJ to the co-owners of the Journal, to publish the Work in this journal and any other BMJ products and to exploit all rights, as set out in our [licence](#).

The Submitting Author accepts and understands that any supply made under these terms is made by BMJ to the Submitting Author unless you are acting as an employee on behalf of your employer or a postgraduate student of an affiliated institution which is paying any applicable article publishing charge ("APC") for Open Access articles. Where the Submitting Author wishes to make the Work available on an Open Access basis (and intends to pay the relevant APC), the terms of reuse of such Open Access shall be governed by a Creative Commons licence – details of these licences and which [Creative Commons](#) licence will apply to this Work are set out in our licence referred to above.

Other than as permitted in any relevant BMJ Author's Self Archiving Policies, I confirm this Work has not been accepted for publication elsewhere, is not being considered for publication elsewhere and does not duplicate material already published. I confirm all authors consent to publication of this Work and authorise the granting of this licence.

1  
2  
3 **Development of a new tool for the assessment of patient defined benefit in hospitalised older**  
4 **patients: the Patient Benefit Assessment Scale for Hospitalised Older Patients (P-BAS HOP)**  
5  
6  
7

8 **Authors:**  
9

- 10 1. Maria Johanna van der Kluit, MSc RN (Corresponding author)  
11  
12 University of Groningen, University Medical Center Groningen, University Center for Geriatric  
13  
14 Medicine, Hanzeplein 1, 9700 RB Groningen, The Netherlands  
15  
16 [m.j.van.der.kluit@umcg.nl](mailto:m.j.van.der.kluit@umcg.nl)  
17  
18 +31503613921  
19  
20  
21 2. Geke J. Dijkstra, PhD  
22  
23 University of Groningen, University Medical Center Groningen, Department of Health Sciences,  
24  
25 Applied Health Research, Groningen, The Netherlands  
26  
27 [g.j.dijkstra@umcg.nl](mailto:g.j.dijkstra@umcg.nl)  
28  
29  
30 3. Barbara C. van Munster, MD PhD  
31  
32 University of Groningen, University Medical Center Groningen, University Center for Geriatric  
33  
34 Medicine, Groningen, The Netherlands.  
35  
36 Department of Geriatrics, Gelre Hospitals, Apeldoorn, The Netherlands.  
37  
38 [b.c.van.munster@umcg.nl](mailto:b.c.van.munster@umcg.nl)  
39  
40  
41 4. Sophia E. de Rooij, MD PhD  
42  
43 University of Groningen, University Medical Center Groningen, University Center for Geriatric  
44  
45 Medicine, Groningen, The Netherlands  
46  
47 Medical Spectrum Twente, Medical School Twente, Enschede, The Netherlands  
48  
49  
50 [sejaderooij@gmail.com](mailto:sejaderooij@gmail.com)  
51

52 Words: 5003

53 Words abstract: 298

54 References: 22

55 Figures: 1

56 Tables: 4  
57  
58  
59  
60

## ABSTRACT

**Objectives:** To support the shift from disease-oriented towards goal-oriented care, we aimed to develop a tool which is capable both to identify priorities of an individual older hospitalised patient and to measure his relevant outcomes.

**Design:** Mixed methods design with open interviews, Three Step Test Interviews (TSTI), and a quantitative field test.

**Setting:** University teaching hospital and a regional teaching hospital.

**Participants:** Hospitalised patients ages 70 years and older.

**Results:** The Patient Benefit Assessment Scale for Hospitalised Older Patients (P-BAS HOP) consists of a baseline questionnaire and an evaluation questionnaire. Items were based on qualitative interviews with hospitalised older patients. Feedback from a panel of four community-dwelling older persons resulted in some adaptations to wording and one additional item. TSTIs with Version 1 of the baseline questionnaire with twenty-six hospitalised older patients showed indications for a good content validity and revealed barriers in completion behaviour, global understanding, and understanding of individual items, which were solved with several adaptations. Four additions were made by participants. After TSTIs with ten patients with the evaluation questionnaire, one adaptation was made. A field test with 91 hospitalised older patients revealed a small number of missing values.

To enhance the feasibility, the number of items was reduced based on correlations and mean impact score. The field test was repeated with 104 patients in a regional teaching hospital. To enhance the understanding, the tool was split into two phases. This version was tested with TSTIs with eight patients and appeared to be understandable. The final version was an interview-based tool with 22 items plus an open option and took about 11 minutes to complete.

**Conclusions:** The P-BAS HOP is a potentially suitable tool to identify priorities and relevant outcomes of the individual patient. Further research is needed to investigate its validity, reliability and responsiveness.

**Keywords** Geriatric medicine; Older adults; Hospitalisation; Patient perspective; Goal setting; Patient-reported outcomes; Tool; Value-Based Health Care

## ARTICLE SUMMARY

### Strengths and limitations of this study

- The content of the P-BAS HOP is based on open interviews with hospitalised older patients.
- Patients are able to indicate their individual outcome priorities.

- 1  
2  
3 ● The P-BAS HOP is tested intensively in the target population with Three Step Test Interviews. This  
4 gave valuable insights into the understanding of the tool and the completion behaviour of the  
5 participants.  
6  
7  
8 ● The current version of the P-BAS HOP is only suitable to be completed with an interviewer and  
9 not as a self-administered questionnaire.  
10  
11 ● It is unknown whether the P-BAS HOP is feasible in other healthcare systems, languages and  
12 cultures than in the Netherlands.  
13  
14  
15  
16  
17  
18  
19  
20  
21  
22  
23  
24  
25  
26  
27  
28  
29  
30  
31  
32  
33  
34  
35  
36  
37  
38  
39  
40  
41  
42  
43  
44  
45  
46  
47  
48  
49  
50  
51  
52  
53  
54  
55  
56  
57  
58  
59  
60

For peer review only

## BACKGROUND

To fit the needs of the ageing population, and patients with multiple chronic diseases, a shift is recommended from disease-oriented towards goal-oriented care. Older patients with multimorbidity may be more interested in more personal goals such as for them important symptoms, functional status and social functioning than in traditional outcomes such as survival and biomarkers.<sup>1,2</sup> When care would be systematically evaluated by personal goal-oriented outcomes, a tool is needed which is capable both to identify the priorities of the individual patient and to measure his relevant outcomes.

Three literature reviews<sup>3-5</sup> into tools used to assess patient outcome priorities in the context of multimorbidity revealed a few potentially useful tools. Tools only suitable for specific activities, such as the Canadian Occupational Performance Measure (COPM),<sup>3,5</sup> Self-Identified Goals Assessment (SIGA),<sup>5</sup> Assessment of Motor and Process Skills (AMPS) and McMaster Toronto Arthritis (MACTAR)<sup>3</sup> were ignored. A general tool is the Outcome Prioritization Instrument,<sup>4,6</sup> which is suitable to elicit four patient priorities, but these priorities are still very global and it remains unclear how to evaluate them after treatment. Another tool is the Goal Attainment Scaling (GAS)<sup>3,5</sup> which is designed to set and evaluate individualized goals and outcomes. Disadvantages of the GAS are that it can be too challenging for patients to articulate their own goals and that it is time consuming.<sup>7</sup> The International Classification of Functioning, Disability and Health (ICF) framework for goal setting is used to categorize patient goals set in semi-structured interviews, but has still the same disadvantages as the GAS and has, in addition, a very poor responsiveness.<sup>5</sup> Finally, with the Target Complaints,<sup>3</sup> the patient defines target complaints as those problems for which help was sought. These complaints are scored at the beginning and at the end of the treatment by the patient, or the patient rates the degree of improvement.<sup>8,9</sup> The Target Complaints is individualized and patient-centred. However, it focuses solely on problems and not on goals. Disadvantages for the GAS, ICF and Target Complaints could be that for some older patients it might be difficult to formulate their own goals and problems because many older persons are not accustomed to defining and discussing personal goals and prompting is often necessary.<sup>10</sup> The quality of the answers is therefore dependent on the interviewer's experiences and techniques.

For this reason, another method of defining patient-defined goals and outcomes was sought and found in the literature about treatment of acne. Augustin et al.<sup>11</sup> developed a tool consisting of two parts: 1) a baseline questionnaire to assess the importance of various predefined goals, based on themes derived from qualitative interviews in patients with acne and 2) an evaluation questionnaire to evaluate the extent to which treatment helped to achieve these goals. Based on these data it is possible to compute an individual Patient Benefit Index. This is an overall value between 0 (no benefit) and 4 (maximal benefit), which reflects the achievement of the goals weighted by the

1  
2  
3 importance.<sup>11</sup> The advantage of this tool is the insight into the individualized patient perspective,  
4 together with standardisation.

5  
6 The aim of this study was to develop a tool to inventory individual goals and benefits of older  
7 hospitalised patients, based on the model of Augustin et al.<sup>11</sup> This article presents its development,  
8 early testing and adaptations.  
9  
10

## 11 12 13 **METHODS**

14 The steps used to develop the Patient Benefit Assessment Scale for Hospitalised Older Patients (P-  
15 BAS HOP) are based on the steps of De Vet et al.<sup>12</sup> and outlined in Figure 1. After each step, the tool  
16 was adapted. The steps are explained in the following sections. The P-BAS was developed and tested  
17 in Dutch. The P-BAS was translated into English in a translation - back translation procedure involving  
18 four translators (two native English, two native Dutch), a language professional and authors MJvdK  
19 and GD.<sup>13</sup>  
20  
21  
22  
23  
24  
25

26 Figure 1. Development of the P-BAS HOP  
27

### 28 29 **1. Qualitative study**

30 Firstly, open interviews with hospitalised older medical and surgical patients about their goals  
31 regarding their hospitalisation were performed. The description of these goals is published  
32 elsewhere.<sup>14</sup> These goals were then coded inductively and transformed into questionnaire items, and  
33 the first draft of the P-BAS HOP was then constructed, consisting of a baseline questionnaire and an  
34 evaluation questionnaire.  
35  
36  
37  
38

### 39 **2. Panel of community-dwelling older persons**

40 The first draft version was proposed by e-mail to a panel of community-dwelling older persons to  
41 assess the comprehensibility and relevance of the items and the tool and ask for omissions or  
42 redundancies.  
43  
44  
45

### 46 **3. Pilot test: Three Step Test Interview (TSTI).**

47 The adapted tool (Version 1, Appendix 1) was tested with the TSTI<sup>15, 16</sup> in older hospitalised patients.  
48 The TSTI is a type of cognitive interview suitable to assess how people interpret a questionnaire, its  
49 different items and what kind of strategies they use in responding to them. The TSTI consists of the  
50 following steps:  
51  
52  
53

54 **Step 1: Concurrent thinking aloud**

55 The participant completed version 1 of the P-BAS HOP while thinking aloud. The interviewer  
56 observed, made notes of the participant's behaviour (hesitations, skipping questions, corrections)  
57 and verbalized thoughts. However, the interviewer did not talk, or intervene. The instructions for the  
58  
59  
60



1  
2  
3 participant were: Please fill in this questionnaire and try to think aloud about what your thoughts are  
4 while reading the questions and choosing the right response category.

#### 6 Step 2: Retrospective interview

8 With the retrospective interview any gaps from the first step were filled in. Every behaviour and  
9 thought from the observation of which the interviewer wanted further information, was clarified.

#### 11 Step 3: Semi-structured interview

13 An in-depth interview was conducted, aimed at eliciting the participant's considerations and  
14 opinions. The participant was given the opportunity to explain behaviour, actions or thoughts that he  
15 had in the previous steps. The participant was asked how he understood different items, was asked  
16 for any omissions and his opinion about filling in the questionnaire. The participant was also asked  
17 to explain his goals in his own words in order to perform a first content validation of the P-BAS HOP.  
18  
19  
20  
21  
22

#### 23 Participants

25 Eligible participants of the TSTI were 70 years and older; planned or unplanned hospitalised on  
26 medical or surgical wards of a university teaching hospital in the Netherlands; able to speak and  
27 understand Dutch and were without cognitive impairment. Inclusion criteria were verified with the  
28 staff nurse, and patients were then approached by the interviewer (MJvdK). Participants were  
29 completely anonymous, no list with names or other identifying data was made, nor did the  
30 researchers have access to medical records. Participants gave verbal consent to the interview and  
31 audio recording.  
32  
33  
34  
35  
36  
37

#### 38 Data analysis

40 Data gathering and data analysis were alternated. Interviews were audio recorded and transcribed  
41 verbatim. All remarks were then organised by question and step. After that, the data were coded by  
42 MJvdK and grouped into categories. The tool was adapted several times after the feedback until it  
43 was considered feasible and understandable.  
44  
45

46 The TSTI was repeated with the evaluation questionnaire. This was done at patient discharge. These  
47 steps led to construction of the P-BAS HOP Version 2.  
48  
49  
50

#### 51 **4. Field test with Version 2. Item reduction based on mean impact score and correlation.**

53 Version 2 was tested with a new group of hospitalised older patients. The aim of this field test was to  
54 assess the feasibility of the P-BAS HOP in combination with other questionnaires. The trained  
55 research assistants observed during the field test that the tool was too time consuming and that  
56 some patients still had difficulties relating the questions to their personal situation, as was observed  
57  
58  
59  
60

1  
2  
3 in the TSTI. Therefore, the following extra adaptations were made: item reduction, answer option  
4 reduction, and splitting the tool into two phases.  
5  
6  
7

### 8 Participants

9 Eligible participants were consecutive patients aged 70 years and older; planned or unplanned  
10 hospitalised on medical or surgical wards of a university teaching hospital, expected to stay for at  
11 least 48 hours; and at maximal four days hospitalised at the moment of interviewing; able to speak  
12 and understand Dutch and were without cognitive impairment. Inclusion criteria were verified with  
13 the staff nurse. Patients were approached by a trained research assistant and gave signed informed  
14 consent to participate. The questionnaire was then conducted in a face to face interview with the  
15 research assistant, but to patients in a better condition and with middle or higher education the  
16 opportunity was given to fill in the questionnaire themselves, an option which only a minority of  
17 patients choose.  
18  
19  
20  
21  
22  
23  
24  
25

### 26 Item reduction

27 Item reduction was based on correlation and mean impact score.

28 Items within one category with a strong correlation, measured probably the same construct.

29 Therefore, from dyads with a Spearman's rank-order correlation  $> 0.7$ , one item was removed.<sup>12</sup> For  
30 the calculation of the Spearman's rank-order correlation coefficient, the answer option 'does not  
31 apply to me now' and 'not at all important' were coded as 0, the options somewhat, moderately,  
32 quite important and very important were coded respectively as 1, 2, 3, 4.  
33  
34  
35  
36  
37

38 For the reduction based on mean impact score, all items were sorted into categories. For each item  
39 the mean impact score was calculated: [% for whom the item played a role] \* [mean importance for  
40 that item]. From every category with two or more items, the item with the lowest mean impact score  
41 was removed.<sup>12</sup> The field test was repeated in a regional teaching hospital by a trained research  
42 assistant, to check whether the impact differed in another context.  
43  
44  
45  
46  
47

### 48 5. TSTI with Version 3.

49 Version 3 was tested again with the TSTI in hospitalised older patients. The procedure was identical  
50 as in step 3, however as this version is only applicable as an interview version, this was done with an  
51 interviewer and observant. The observant only observed during the first step, and took over the  
52 interview role in the second and third steps.  
53  
54  
55  
56  
57

### 58 Patient and public involvement

Patients and public were involved in the generation of the items, the importance and relevance of the items and the assessment of the feasibility and understanding of the tool.

## RESULTS

### 1. Qualitative study

After the first fifteen qualitative interviews, the goals formulated in these interviews were transferred to questionnaire items, which resulted in the first draft. The results of this qualitative study are published elsewhere.<sup>14</sup>

### 2. Panel of community-dwelling older persons

Four community-dwelling older persons gave written feedback on the draft version of the tool. This led to adaptation in wording of the introduction text and to some items which were not clear enough or could be interpreted in multiple ways. An example of an item that was adapted: for the item 'to be able to eat', it was not clear if it concerned the instrumental activity of eating or concerned appetite. Therefore, the item was changed into 'can take pleasure in eating'.

Further, one additional item was added, namely 'to wash and dress yourself' and the sequence of two items was changed. Version 1 of the P-BAS HOP is shown in Appendix 1.

### 3. TSTI

Sample baseline questionnaire

Twenty-six older hospitalised patients participated in the TSTI. Characteristics of the participants are displayed in the second column of Table 1.

Table 1. Participants Three Steps Test Interview (TSTI) baseline questionnaire version 1, evaluation questionnaire version 1 and baseline questionnaire version 3.

|                | Baseline<br>questionnaire<br>version 1<br>(n=26) | Evaluation<br>questionnaire<br>version 1<br>(n=10) | Baseline<br>questionnaire<br>version 3<br>(n=8) |
|----------------|--------------------------------------------------|----------------------------------------------------|-------------------------------------------------|
| Characteristic | n                                                | n                                                  | n                                               |
| Gender         |                                                  |                                                    |                                                 |
| Male           | 19                                               | 8                                                  | 4                                               |
| Female         | 7                                                | 2                                                  | 4                                               |
| Age (years)    |                                                  |                                                    |                                                 |

|                      |    |   |   |
|----------------------|----|---|---|
| 70-79                | 18 | 8 | 7 |
| 80-89                | 7  | 2 | 0 |
| 90-99                | 1  | 0 | 1 |
| Native language      |    |   |   |
| Dutch                | 14 | 7 | 7 |
| Local dialect        | 10 | 2 | 1 |
| Frisian              | 2  | 0 | 0 |
| Foreign language     | 0  | 1 | 0 |
| Educational level*   |    |   |   |
| Low                  | 8  | 5 | 2 |
| Middle               | 10 | 4 | 5 |
| High                 | 8  | 1 | 1 |
| Admission reason†    |    |   |   |
| Cardiac problems     | 9  | 1 | 1 |
| Pulmonary problems   | 7  | 3 | 2 |
| Bowel problems       | 2  | 2 | 1 |
| Fever/ infection     | 2  | 2 | 0 |
| Vascular surgery     | 2  | 1 | 0 |
| Cancer               | 2  | 0 | 0 |
| Accident/fracture(s) | 2  | 0 | 1 |
| Kidney problems      | 0  | 1 | 1 |
| Syncope              | 0  | 0 | 1 |
| Ulcers               | 0  | 0 | 1 |

\* Definition educational level: Low= no education, primary school, basic vocational training; Middle = secondary education, vocational training; High = bachelor, master

† Reason according to the patient

#### Coding categories

The codes were sorted into the following categories: Completion behaviour, Global understanding, Understanding and reactions regarding individual items, Additions, General evaluation, and Content validity.

#### *Completion behaviour*

1  
2  
3 With 'completion behaviour' is meant the behaviour participants showed when completing the  
4 questionnaire. Observations revealed that many participants skipped the instruction text partly or  
5 even completely. For some participants, reading these instructions was demanding, others did not  
6 understand how a table works and where to place a mark. Adding an example table with instructions  
7 showing how and where to place a mark brought no improvements, since some participants started  
8 to complete the example, although 'example' was indicated very explicitly in the table. In the final  
9 version boxes to tick were included in the table.  
10  
11  
12  
13  
14

### 15 16 *Global understanding*

17 Many examples of correct understanding were coded. For example:

18  
19  
20 *Item regaining weight, step 1: Oops, dear, pooh, let's see, that is certainly important,*  
21 *because I have lost weight lately since I had not been feeling well for a while, that is, not*  
22 *shortness of breath or anything, but, very tired, listless. So, a little weight gain is important. I*  
23 *came from [other hospital], where I was first admitted and so I got help here, and there I*  
24 *already got a little bottle of nutritional drink twice a day, which I, yes, I always call it baby*  
25 *food, to strengthen myself. Lots of calories, proteins, etc. So that is important. (P9)*

26  
27  
28 Or:

29  
30  
31 *Item walking, step 1: Well, I walk well. Doesn't apply to me. (P17)*  
32  
33  
34

35 A few participants interpreted the questions as if it was an evaluation of their current level of  
36 functioning. For example:

37  
38 *Item energy, step 2: I: You have filled in 'not at all' in 'you have more energy'. What is the*  
39 *reason that you just ...? P: Because I feel lethargic. That is what I mean to say. I used to be a*  
40 *very energetic person. I was talking about it with my son and my wife last week: I could do*  
41 *everything, I did everything and I tried everything. That is gone. I: That's gone, yes. P: That is*  
42 *what I mean by that question. I: Yes, so you actually filled in how you are feeling now. P: Yes,*  
43 *now. At the time. I: Yes, so you say .. P: Not from last year or half a year ago. They are*  
44 *snapshots, aren't they? That was what you meant, right? (...) I: And when I ask you the*  
45 *question: 'How important is it that you get energy again?' P: Very important. I: That's very*  
46 *important. P: Because I've always been energetic. Very important. I: Yes, okay. P: Terribly*  
47 *important. (P2)*  
48  
49  
50  
51  
52  
53  
54  
55  
56

57 Other participants had difficulties relating the goals to their own situation. For example:

58  
59 *Item shortness of breath, step 1 I'm actually never short of breath. But it is quite important.*  
60 *(P25)*

1  
2  
3 There were also participants who did recognize that a certain goal did not apply for them, but they  
4 did not understand how to indicate that in the tool. For example:

5  
6 *Item regaining weight, step 2: I: I see that you have left open question 2, about regaining*  
7 *weight. P: Oh, that, uh, regain weight. (...) I: So I wondered does that have a special reason*  
8 *that you left it open? P: I don't have to regain weight. I don't have to. I have to go down. See,*  
9 *that is not there. So, what am I supposed to do with that, I don't, I don't know what... I: Then*  
10 *you don't know what to do with it. P: No. Then I think, I just continue. (P18)*

11  
12  
13  
14  
15 Some participants were reluctant to use the options 'not at all important' or 'doesn't apply to me',  
16 because they deemed those answers socially undesirable.

17  
18  
19  
20 Since many older persons have multiple health problems, it is possible that a participant experiences  
21 a problem with an item, but is admitted for another health problem. Many participants were able to  
22 make this distinction. For example:

23  
24  
25 *Item moving, step 1: Yes, that will never be all right again, I can tell. Does no longer apply at*  
26 *all. Already 30 years ago they said: Mr. B., you have to learn to live with that. And they still*  
27 *say that today. Osteoarthritis, there is nothing you can do about it. (P18)*

28  
29  
30 But for others this distinction was more difficult.

### 31 32 33 *Adaptations*

34  
35 To enhance the general understanding, the following adaptations to the tool were made and tested  
36 in new participants:

37  
38 Several adaptations were made in the instruction text.

39  
40 In the columns with the answer options the word 'important' was added to all answer options. For  
41 example: 'very' was changed into 'very important', to make clear that the question was not to  
42 evaluate current function, but to indicate how important the goal was.

43  
44 The sequence of the questions was changed. To enable participants to relate the goals to their own  
45 situation, the questions related to somatic complaints were moved to the beginning of the  
46 questionnaire.

47  
48  
49  
50 Another adaptation made to improve the understanding to relate the goals to the patients' own  
51 situation, was to add the word 'again' to the goals, to make clear that it is something they had before  
52 and they have to regain by the hospital admission. For example: *How important is it to you that you*  
53 *have normal bowel movements again.*

54  
55  
56 The next adaptation was to move the answer option 'doesn't apply to me' from the last to the first  
57 column. This made it easier to find that option.

1  
2  
3 The final adaptation to improve making the connection between the hospital admission and their  
4 goals, was repeating the question in every line. Instead of having the text '*How important is it to you*  
5 *that by this hospital admission...*' on top of the page alone, this question was repeated in every row.  
6  
7  
8 Apart from this, several adaptations were made to the layout in order to ease the reading for  
9  
10 participants.

### 11 12 13 *Understanding and reactions regarding individual items*

14 The following individual items caused discussion: take pleasure in eating, to know the cause of your  
15 complaints, take a short break, and remain alive.  
16  
17

#### 18 19 20 *Take pleasure in eating*

21 Some participants had a more epicurean association with this item. Therefore, it was changed into:  
22  
23 'regain appetite'.  
24  
25

#### 26 27 *Cause of complaints*

28 With the item 'how important is it for you that you know the cause of your complaints?' some  
29 participants spontaneously started to describe risk factors like smoking. By changing the item into  
30 'knowing what is wrong with you', this was solved.  
31  
32  
33

#### 34 35 *Take a short break*

36 The item 'can take a short break' gave many different interpretations, often without any relationship  
37 with the hospital. Several alternatives were tried: 'to recharge', 'to take a moment', but these did not  
38 improve the understanding. It was therefore decided to remove this item.  
39  
40  
41

#### 42 43 *Remain alive*

44 The item 'remain alive' gave mixed reactions. Some were irritated by the question. For others it was  
45 obvious that it was very important to them that they wanted to remain alive, by adding words like 'of  
46 course!'. However, there were also participants who deemed remaining alive less obvious and  
47 started to think about the question. For example:  
48  
49  
50

51 *Item remain alive, step 1: Yes, at least if my life stays well through it. But if it makes my life*  
52 *much worse, it doesn't matter for me any longer. (P6)*  
53

54 Unless the mixed reactions to this question, it was remained because it was not obvious for all  
55 participants and because the researchers considered it unreasonable to have a questionnaire with  
56 many potential outcomes, but to omit the one outcome that for many participants is considered as  
57 the most important.  
58  
59  
60

### Additions

Participants gave the following suggestions which were added to the questionnaire: family life, driving, hobbies, urinating. The adaptations and additions led to P-BAS HOP Version 2.

### General evaluation

Many participants stated that the questionnaire was quite easy to fill out, although this was not always congruent with the observations about their understanding. Several mentioned enjoying filling in the questionnaire. One participant mentioned that the tool was very important for him in order to state his own priorities. For another participant the questionnaire was considered emotional, because the questions were confronting and he was afraid that many goals were not feasible. For some the questionnaire was somewhat tiring.

### Content Validity

The goals the participants mentioned in their own words, were qualified in the questionnaire as at least 'somewhat important' in almost all cases. For example:

*Yes, that is the quality of life .. Yes, it is important that comes up to standard again. (...) Well, cycling that, that comes in second place. I think **walking** is more important than ehm .. (...) I have been a volunteer for more than forty years now, helping people fill out tax forms. I think that is important to me. And that is, that is, that is also the **volunteer work**. If it is somewhat possible I would like to do that again. (...) Ehm, **go on outings**. I would like to keep doing things like that. (...) I have two grandsons: one is 6 and one is 8. And they are with us then. Well, when they are on holiday, a day to an amusement park with those little boys. Very nice. But what is also nice, is a day with the boys to the petting zoo. Those children like that and I like it when they have fun. That's it. And those kind of things you hope to be able to do that normally again in the future. (P14)*

This participant filled in in the questionnaire: Walking: quite important, (volunteer) work: moderately important, go on outings: moderately important.

### TSTI evaluation questionnaire

#### Sample evaluation questionnaire

Ten patients participated in the TSTI for the evaluation questionnaire at discharge. The sampling of the participants continued until the last version of the questionnaire was considered clear and did not reveal any new problems. Characteristics of the participants are displayed in the third column of Table 1.



### Process of testing and adaptations

The process of testing and adapting the evaluation questionnaire was much faster, because many problems with layout and wording of individual items had already been solved in the baseline phase. In the first version, the wording appeared to be too complicated for some participants. For example:

*P: I find the questions complicated. I: Yes, because what makes it complicated for you? P: Well it says: 'helped you, the hospitalisation helped you to ...' I always find that so difficult, that that is in there. Because what kind of answer should you give? (E5)*

Therefore, the original formulation: 'The hospitalisation helped me to....' Was changed into: 'Because of the hospitalisation....'. This adaptation was clear for all the following participants and led to Version 2.

#### 4. Field test with Version 2. Item reduction based on mean impact score and correlation.

The Benefit Assessment Scale Version 2 consisted of 32 items. In the three month inclusion period, 492 consecutive eligible patients meeting the inclusion criteria were admitted on the selected wards. Of these patients, 238 were not approached for logistic reasons. Hence, 254 patients were approached for informed consent and 106 patients (42%) gave informed consent. Of the 106 included patients, the P-BAS was not administered 15 times because of lack of time (for example patient had to leave for treatment or discharge) or the patient was too tired. This resulted in 91 administered P-BAS questionnaires. Of the 91 participants, 20 answered the questionnaire independently written and 71 were interviewed by the research assistant. Characteristics of the participants are displayed in Table 2 and the results are shown in Table 3.

Table 2. Participants Field test (n=91)

| Characteristic              | n            |
|-----------------------------|--------------|
| Gender                      |              |
| Male                        | 63           |
| Female                      | 28           |
| Age (years), median (range) | 75 (70 – 96) |
| Native language             |              |
| Dutch                       | 55           |
| Local dialect               | 27           |
| Frisian                     | 3            |
| Unknown                     | 6            |

|                    |    |
|--------------------|----|
| Educational level* |    |
| Low                | 22 |
| Middle             | 47 |
| High               | 22 |
| Specialty          |    |
| Medical            | 42 |
| Surgical           | 23 |
| Cardiology         | 26 |
| Admission type     |    |
| Acute              | 60 |
| Elective           | 31 |

\* Definition educational level: Low= no education, primary school, basic vocational training; Middle = secondary education, vocational training; High = bachelor, master

Table 3. Scores of Version 2 Benefit Assessment Scale Baseline. (n=91)

| Item                  | Missing          |                | Does not apply to me now<br>n (%) | Importance          |                        |                          |                |               |
|-----------------------|------------------|----------------|-----------------------------------|---------------------|------------------------|--------------------------|----------------|---------------|
|                       | Failed*<br>n (%) | n.d.†<br>n (%) |                                   | Not at all<br>n (%) | Some-<br>what<br>n (%) | Mode-<br>rately<br>n (%) | Quite<br>n (%) | Very<br>n (%) |
|                       | Better           | 1 (1.1)        |                                   | 0                   | 8 (8.8)                | 0                        | 1 (1.1)        | 2 (2.2)       |
| Weight                | 1 (1.1)          | 1 (1.1)        | 57 (62.6)                         | 10 (11.0)           | 4 (4.4)                | 7 (7.7)                  | 3 (3.3)        | 8 (8.8)       |
| Condition             | 0                | 0              | 17 (18.7)                         | 2 (2.2)             | 1 (1.1)                | 6 (6.6)                  | 31 (34.1)      | 34 (37.4)     |
| Energy                | 0                | 1 (1.1)        | 18 (19.8)                         | 1 (1.1)             | 0                      | 3 (3.3)                  | 33 (36.3)      | 35 (38.5)     |
| Pain                  | 1 (1.1)          | 1 (1.1)        | 33 (36.3)                         | 0                   | 2 (2.2)                | 4 (4.4)                  | 9 (9.9)        | 41 (45.1)     |
| Bowel movements       | 0                | 1 (1.1)        | 58 (63.7)                         | 4 (4.4)             | 2 (2.2)                | 1 (1.1)                  | 12 (13.2)      | 13 (14.3)     |
| Urinate               | 0                | 1 (1.1)        | 64 (70.3)                         | 4 (4.6)             | 0                      | 1 (1.1)                  | 10 (11.0)      | 11 (12.1)     |
| Shortness of breath   | 1 (1.1)          | 0              | 39 (42.9)                         | 1 (1.1)             | 2 (2.3)                | 5 (5.5)                  | 11 (12.1)      | 32 (35.2)     |
| Walking               | 0                | 1 (1.1)        | 32 (35.2)                         | 1 (1.1)             | 3 (3.3)                | 5 (5.5)                  | 16 (17.6)      | 33 (36.3)     |
| Moving                | 0                | 1 (1.1)        | 35 (38.5)                         | 1 (1.1)             | 2 (2.2)                | 5 (5.5)                  | 18 (19.8)      | 29 (31.9)     |
| Appetite              | 0                | 2 (2.2)        | 55 (60.4)                         | 1 (1.1)             | 2 (2.2)                | 6 (6.6)                  | 9 (9.9)        | 16 (17.6)     |
| Knowing what is wrong | 0                | 1 (1.1)        | 32 (35.2)                         | 2 (2.2)             | 2 (2.2)                | 1 (1.1)                  | 12 (13.2)      | 41 (45.1)     |
| Disease under control | 0                | 1 (1.1)        | 10 (11.0)                         | 0                   | 0                      | 2 (2.2)                  | 15 (16.5)      | 63 (69.2)     |
| Alive                 | 0                | 1 (1.1)        | 2 (2.2)                           | 2 (2.2)             | 1 (1.1)                | 1 (1.1)                  | 13 (14.3)      | 71 (78.0)     |
| Enjoy                 | 0                | 2 (2.2)        | 20 (22.0)                         | 0                   | 0                      | 2 (2.2)                  | 13 (14.3)      | 54 (59.3)     |

|                |         |         |           |         |         |         |           |           |
|----------------|---------|---------|-----------|---------|---------|---------|-----------|-----------|
| Freedom        | 0       | 1 (1.1) | 31 (34.1) | 0       | 1 (1.1) | 1 (1.1) | 12 (13.2) | 45 (49.5) |
| Cooking        | 0       | 2 (2.3) | 51 (56.0) | 1 (1.1) | 4 (4.4) | 2 (2.2) | 14 (15.4) | 17 (18.7) |
| Housework      | 0       | 1 (1.1) | 51 (56.0) | 2 (2.2) | 5 (5.5) | 5 (5.5) | 10 (11.0) | 17 (18.7) |
| Groceries      | 0       | 1 (1.1) | 42 (46.2) | 1 (1.1) | 5 (5.5) | 9 (9.9) | 12 (13.2) | 21 (23.1) |
| Wash and dress | 0       | 2 (2.3) | 51 (56.0) | 0       | 0       | 2 (2.2) | 14 (15.4) | 22 (24.2) |
| Garden         | 0       | 1 (1.1) | 48 (52.7) | 2 (2.2) | 1 (1.1) | 8 (8.8) | 10 (11.0) | 21 (23.1) |
| Sports         | 0       | 1 (1.1) | 46 (50.5) | 7 (7.7) | 2 (2.2) | 9 (9.9) | 7 (7.7)   | 19 (20.9) |
| Hobbies        | 0       | 1 (1.1) | 39 (42.9) | 1 (1.1) | 2 (2.2) | 4 (4.4) | 13 (14.3) | 31 (34.1) |
| Work           | 0       | 3 (3.3) | 63 (69.2) | 3 (3.3) | 0       | 4 (4.4) | 7 (7.7)   | 11 (12.1) |
| Driving        | 0       | 2 (2.2) | 46 (50.2) | 1 (1.1) | 0       | 2 (2.2) | 8 (8.8)   | 32 (35.2) |
| Outings        | 0       | 1 (1.1) | 28 (30.8) | 1 (1.1) | 3 (3.3) | 8 (8.8) | 19 (20.9) | 31 (34.1) |
| Visiting       | 0       | 3 (3.3) | 28 (30.8) | 1 (1.1) | 4 (4.4) | 6 (6.6) | 19 (20.9) | 30 (33.0) |
| Family life    | 0       | 4 (4.4) | 39 (42.9) | 0       | 0       | 2 (2.2) | 12 (13.2) | 34 (37.4) |
| Home           | 0       | 2 (2.3) | 21 (23.1) | 1 (1.1) | 0       | 1 (1.1) | 4 (4.4)   | 62 (68.1) |
| Independence   | 1 (1.1) | 3 (3.3) | 29 (31.9) | 0       | 1 (1.1) | 2 (2.2) | 6 (6.6)   | 49 (53.8) |

\* Measurement failed: invalid answer due to two options filled in

† n.d. = not done. No answer was given.

As seen in Table 3, the number of missing values ranges from zero to four per item. The answer options with the lowest priorities were used the least, especially 'not at all important' and 'somewhat important'. Therefore, and also because the options 'somewhat' and 'moderately' were very close, we decided to remove the option 'moderately'.

Four dyads had a Spearman's rank-order correlation coefficient > 0.7: energy and condition ( $r_s = .80$ ); moving and walking ( $r_s = .87$ ); cooking and groceries ( $r_s = .75$ ); cooking and housekeeping ( $r_s = .70$ ). Therefore of these dyads, one item was removed (condition, moving and cooking), inspired by the information derived from the TSTI's.

Table 4 shows the items with mean impact scores, sorted per category and descending mean impact scores. From the categories with at least two items, the item with the lowest mean impact score was removed. To give participants still the opportunity to indicate their individual priorities, even when being a minority, we added an open option to add extra individual goals.

Table 4. Mean impact scores per category.

| Goals                      | University hospital |                      |                   | Regional teaching hospital |                      |                   |
|----------------------------|---------------------|----------------------|-------------------|----------------------------|----------------------|-------------------|
|                            | Applied (%)         | Importance score (M) | Mean impact score | Applied (%)                | Importance score (M) | Mean impact score |
| <b>Remain alive</b>        |                     |                      |                   |                            |                      |                   |
| Remain alive               | 98                  | 3.70                 | 3.62              | 75                         | 2.64                 | 1.90              |
| <b>Controlling disease</b> |                     |                      |                   |                            |                      |                   |
| Controlling                | 89                  | 3.76                 | 3.34              | 29                         | 2.43                 | 0.70              |

|                                                    |    |      |      |    |      |      |
|----------------------------------------------------|----|------|------|----|------|------|
| disease                                            |    |      |      |    |      |      |
| <b>Improving condition</b>                         |    |      |      |    |      |      |
| Feeling better                                     | 91 | 3.71 | 3.38 | 71 | 2.73 | 1.94 |
| Energy                                             | 80 | 3.40 | 2.72 | 50 | 2.23 | 1.12 |
| <i>Condition</i>                                   | 81 | 3.27 | 2.66 | 65 | 2.34 | 1.53 |
| <i>Weight</i>                                      | 36 | 1.84 | 0.66 | 9  | 2.33 | 0.20 |
| <b>Alleviating complaints</b>                      |    |      |      |    |      |      |
| Pain                                               | 63 | 3.59 | 2.26 | 44 | 2.72 | 1.20 |
| Breath                                             | 57 | 3.39 | 1.92 | 38 | 2.64 | 0.99 |
| Appetite                                           | 38 | 3.09 | 1.18 | 35 | 2.39 | 0.83 |
| Bowel                                              | 35 | 2.88 | 1.03 | 29 | 2.47 | 0.71 |
| <i>Urinate</i>                                     | 29 | 2.92 | 0.83 | 17 | 2.67 | 0.46 |
| <b>Enjoying life</b>                               |    |      |      |    |      |      |
| Enjoying life                                      | 78 | 3.75 | 2.91 | 31 | 2.53 | 0.78 |
| <b>Improving/maintaining social functioning</b>    |    |      |      |    |      |      |
| Outing                                             | 69 | 3.23 | 2.23 | 27 | 2.11 | 0.57 |
| Visiting                                           | 68 | 3.22 | 2.20 | 21 | 1.91 | 0.40 |
| <i>Family life</i>                                 | 55 | 3.67 | 2.03 | 5  | 2.80 | 0.13 |
| <b>Knowing what is wrong</b>                       |    |      |      |    |      |      |
| Wrong                                              | 64 | 3.52 | 2.27 | 39 | 2.58 | 0.99 |
| <b>Regaining/maintaining independence, freedom</b> |    |      |      |    |      |      |
| Home                                               | 76 | 3.85 | 2.94 | 15 | 2.50 | 0.39 |
| Independence                                       | 67 | 3.78 | 2.52 | 17 | 2.44 | 0.42 |
| <i>Freedom</i>                                     | 66 | 3.71 | 2.43 | 23 | 2.54 | 0.59 |
| <b>Improving daily functioning</b>                 |    |      |      |    |      |      |
| Walking                                            | 64 | 3.33 | 2.14 | 54 | 2.57 | 1.38 |
| <i>Moving</i>                                      | 61 | 3.31 | 2.02 | 34 | 2.54 | 0.86 |
| Driving                                            | 48 | 3.63 | 1.75 | 14 | 2.13 | 0.31 |
| Groceries                                          | 53 | 2.98 | 1.59 | 19 | 2.30 | 0.44 |
| Wash/dress                                         | 43 | 3.53 | 1.52 | 26 | 2.52 | 0.65 |
| <i>Cooking</i>                                     | 43 | 3.11 | 1.33 | 15 | 1.75 | 0.27 |
| <i>Housework</i>                                   | 43 | 2.90 | 1.26 | 20 | 1.86 | 0.38 |
| <b>Resuming work/hobbies</b>                       |    |      |      |    |      |      |
| Hobbies                                            | 57 | 3.39 | 1.92 | 20 | 2.00 | 0.40 |
| Garden                                             | 47 | 3.12 | 1.46 | 16 | 1.24 | 0.20 |
| Sports                                             | 49 | 2.66 | 1.30 | 23 | 1.58 | 0.37 |
| <i>Work</i>                                        | 28 | 2.92 | 0.83 | 13 | 1.92 | 0.24 |

The removed items are indicated in italic.

Repetition field test in regional teaching hospital

The field test was repeated in a regional teaching hospital with the same items, but with fewer answer options and the questions in two steps, as explained in the next paragraph. In the eight week

1  
2  
3 inclusion period, 209 patients meeting the inclusion criteria were admitted on the wards. Of these  
4 patients, 56 were not approached for logistic reasons. 153 Were therefore approached for informed  
5 consent and 104 patients (67%) gave informed consent. The items with the lowest mean impact  
6 scores were the same for most categories, except for the categories independence/freedom,  
7 improving daily functioning and work/hobbies.  
8  
9  
10  
11  
12

### 13 Splitting tool into two phases

14 Since some problems with understanding remained, especially the difficulties relating the goals to  
15 their own situation, as described in the TSTI, we decided to split the tool into two phases. In the first  
16 phase an inventory of subjects with problems or limitations was made. These could be  
17 problems/limitations at the moment of interview, at the moment of admission, or expected  
18 problems/limitations. In the second phase, only the importance was asked for the goals related to  
19 the subjects that applied. As this adaptation complicated the tool, we decided to use it as an  
20 interview-based tool. The item reduction and splitting into two phases, resulted in P-BAS HOP version  
21 3.  
22  
23  
24  
25  
26  
27  
28  
29

### 30 5. TSTI with Version 3.

31 P-BAS HOP Version 3 was only suitable as an interview version, therefore, this interview was always  
32 conducted by an interviewer and an observant. Eight participants participated in the TSTI about  
33 Version 3. Characteristics of the participants are displayed in the last column of Table 1.  
34  
35  
36  
37

### 38 General understanding

39 In general, the tool in two phases was well-understood. For example:

40  
41 Item *shortness of breath*, phase 1, step 1: *No, I have no problems with that, you know,*  
42 *shortness of breath. (A1)*  
43  
44

45 Or:

46  
47 Item *shortness of breath*, phase 1, step 1: *Yes, that is present! And for that reason, I am*  
48 *admitted here. My oxygen was too low. And my carbon dioxide level is not good, much too*  
49 *high. Yes, complication of, yes. (A3)*  
50  
51  
52

53 We shortened the instructions, but did not modify the content of the tool. This last adaptation led to  
54 the final questionnaire (Appendix 2). The completion of this baseline questionnaire took 5 to 24  
55 minutes, with a median of 11 minutes.  
56  
57

### 58 DISCUSSION

1  
2  
3 The Patient Benefit Assessment Scale for Hospitalised Older patients (P-BAS HOP) was constructed as  
4 a tool that should be capable both to identify the goals and priorities of the individual older  
5 hospitalised patient and to measure his relevant outcomes regarding hospitalisation.  
6

7  
8 The items of the P-BAS HOP were based on interviews with hospitalised older patients. Including  
9 patients in the generation of patient reported outcomes is not self-evident and is even absent in  
10 many cases.<sup>17</sup> But even when patients are involved in the generations of outcomes, they still only  
11 reflect the priorities of the overall patient population and not the individual patient. Therefore, the  
12 major advantage of the P-BAS HOP is that patients can indicate their individual priorities, which also  
13 leads to individual benefits.  
14

15  
16 Indicating individual priorities is also possible with the GAS, but the GAS is more time consuming,  
17 varying from 15-20 minutes for experienced assessors,<sup>18</sup> to 90 minutes per patient,<sup>19</sup> while the P-BAS  
18 HOP takes 5 to 24 minutes, with a median of 11 minutes.  
19

20  
21 The pilot and field tests of the P-BAS HOP started before we achieved complete saturation of the  
22 goals in the qualitative interviews. Therefore, patients had the possibility to add goals during the  
23 TSTI. Several goals were added during the TSTI, which also appeared later in the qualitative  
24 interviews.<sup>14</sup> Still, the qualitative interviews revealed later some extra target complaints, which were  
25 not included in the P-BAS HOP, such as vomiting, dizziness and sweating. Yet, in the final version of  
26 the P-BAS HOP, patients still have the opportunity to add personal goals which were not mentioned  
27 before.  
28

29  
30 As this is a formative tool, item reduction could be problematic since procedures suitable for  
31 reflective tools, such as based on factor analysis and internal consistency, are not relevant.<sup>12</sup> By using  
32 the mean impact score to reduce items, items considered least important by the overall sample were  
33 removed, though this does not take account of the priorities of individuals who deviate from the  
34 majority. For this reason the extra open option was added. Most removed items, based on mean  
35 impact score, were confirmed when repeated in the regional teaching hospital. The only exceptions  
36 were in the categories *improving daily functioning*, *resuming work/hobbies*, and  
37 *regaining/maintaining independence/freedom*.  
38

39  
40 In the categories *improving daily functioning* and *resuming work/hobbies*, the lowest priorities were  
41 'housework' and 'work' in the first sample and 'driving' and 'gardening' in the second. Since driving  
42 and work were the second lowest priority in the second sample, the removal of housework and work  
43 could be justified.  
44

45  
46 In the category *regaining/maintaining independence/freedom* priorities in both hospitals were  
47 entirely opposite. We therefore have to conclude that we were too early to remove the item  
48 freedom. It is unclear whether these differences are caused by different contexts or because the field  
49  
50  
51  
52  
53  
54  
55  
56  
57  
58  
59  
60

1  
2  
3 test in the regional hospital was after splitting the questionnaire into two phases and therefore the  
4 questions were altered.

5  
6 The P-BAS HOP is only tested in hospitalised patients without cognitive impairment. It is therefore  
7 unknown if it is suitable in other contexts and it might be too complex for patients with cognitive  
8 impairment. In addition, the P-BAS HOP is only tested in the Netherlands and the translated English  
9 version has not yet been tested. Therefore, it is unknown whether the P-BAS HOP is applicable in  
10 other languages and cultures.

11  
12 The TSTI gave valuable insights into the understanding of the questionnaire and the completion  
13 behaviour of the participants. Many adaptations were made, but it proved difficult to make the  
14 questionnaire understandable for all patients. These kinds of difficulties were seen in various  
15 examples where the TSTI was used.<sup>15, 20-22</sup> Unfortunately, the final version is only suitable to be  
16 completed with an interviewer and not as a self-administered questionnaire. The TSTI gave a first  
17 indication of the content validity, but further quantitative research into the construct validity,  
18 reliability and responsiveness is needed.  
19  
20  
21  
22  
23  
24  
25  
26  
27

## 28 **Conclusions**

29  
30 The Patient Benefit Assessment Scale for Hospitalised Older Patients (P-BAS HOP) is a potentially  
31 suitable interview-based tool to identify the priorities and relevant outcomes of the individual older  
32 hospitalised adult. Based on these data it is possible to compute an individual Patient Benefit Index,  
33 which is an overall value between 0 (no benefit) and 3 (maximal benefit), which reflects the  
34 achievement of the goals weighted by the importance. Further quantitative research is needed to  
35 investigate the construct validity, reliability and responsiveness.  
36  
37  
38  
39  
40  
41

42 **Acknowledgements** We would like to thank all patients who participated in the interviews for  
43 sharing their stories with us and their feedback on the different versions of the P-BAS HOP. We thank  
44 the panel members for their feedback on the draft version. We would also like to thank all the  
45 research assistants and students for the many interviews they conducted, especially Gerdine Boot for  
46 all the patients she interviewed in the regional teaching hospital. We would like to thank Daniël  
47 Bosold, Janet Vroomen, Caroline Mutsaers, Margaretha Schenkeveld and Anna Pot for their role in  
48 the translation process of the P-BAS HOP.  
49  
50  
51  
52

53 **Funding** This study was funded by an unrestricted grant from the Dutch Foundation for Effective  
54 Elderly Care and the University of Groningen.  
55

56 **Author's contribution** MJvdK designed the study. MJvdK conducted the Three Step Test Interviews  
57 (TSTI's). MJvdK coded the data of the TSTI's. MJvdK and SEdR regularly discussed the codes and the  
58 progress and adaptations of the different versions of the P-BAS HOP. SEdR supervised the field test in  
59  
60

1  
2  
3 the University hospital, BCvM in the Regional teaching hospital. MJvdK wrote the first draft of the  
4 manuscript, GJD, BCvM and SEdR contributed significantly to subsequent manuscript revisions. All  
5 authors have read and approved the final version of the manuscript.  
6  
7

8 **Competing interests** None declared

9  
10 **Data sharing** All data relevant to the study are included in the article

11 **Patient consent** All patients gave informed consent

12  
13 **Ethical approval**

14  
15 The Medical Ethics Research Committee of the UMCG (file number M16.192615 and M16.199647)  
16 confirmed that the Medical Research Involving Human Subjects Act did not apply to the research  
17 project. Official approval by the committee was therefore not required.  
18  
19

20  
21 **REFERENCES**

22  
23  
24 1 Reuben DB, Tinetti ME. Goal-oriented patient care--an alternative health outcomes paradigm. *N*  
25 *Engl J Med* 2012;366:777-9 doi:10.1056/NEJMp1113631.

26  
27  
28 2 Tinetti ME, Naik AD, Dodson JA. Moving from disease-centered to patient goals-directed care for  
29 patients with multiple chronic conditions: Patient value-based care. *JAMA Cardiology* 2016;1:9-10  
30 doi:10.1001/jamacardio.2015.0248.

31  
32  
33 3 Donnelly C, Carswell A. Individualized outcome measures: a review of the literature. *Can J Occup*  
34 *Ther* 2002;69:84-94.

35  
36  
37 4 Mangin D, Stephen G, Bismah V, et al. Making patient values visible in healthcare: a systematic  
38 review of tools to assess patient treatment priorities and preferences in the context of  
39 multimorbidity. *BMJ Open* 2016;6:e010903- doi:10.1136/bmjopen-2015-010903.

40  
41  
42 5 van Seben R, Reichardt L, Smorenburg S, et al. Goal-Setting Instruments in Geriatric Rehabilitation:  
43 A Systematic Review. *J Frailty Aging* 2017;6:37-45 doi:10.14283/jfa.2016.103.

44  
45  
46 6 Fried TR, Tinetti M, Agostini J, et al. Health outcome prioritization to elicit preferences of older  
47 persons with multiple health conditions. *Patient Educ Couns* 2011;83:278-82  
48 doi:10.1016/j.pec.2010.04.032.

49  
50  
51 7 Stolee P, Awad M, Byrne K, et al. A multi-site study of the feasibility and clinical utility of Goal  
52 Attainment Scaling in geriatric day hospitals. *Disabil Rehabil* 2012;34:1716-26  
53 doi:10.3109/09638288.2012.660600 [doi].

54  
55  
56 8 Battle CC, Imber SD, Hoehn-Saric R, et al. Target complaints as criteria of improvement. *Am J*  
57 *Psychother* 1966;20:184-92 doi:10.1176/appi.psychotherapy.1966.20.1.184 [doi].

58  
59  
60 9 Hesbacher PT, Rickels K, Weise C. Target symptoms: a promising improvement criterion in  
psychiatric drug research. *Arch Gen Psychiatry* 1968;18:595-600.



- 1  
2  
3 10 Schulman-Green DJ, Naik AD, Bradley EH, et al. Goal setting as a shared decision making strategy  
4 among clinicians and their older patients. *Patient Educ Couns* 2006;63:145-51 doi:S0738-  
5 3991(05)00275-2 [pii].  
6  
7  
8 11 Augustin M, Reich C, Schaefer I, et al. Development and validation of a new instrument for the  
9 assessment of patient-defined benefit in the treatment of acne. *J Dtsch Dermatol Ges* 2008;6:113-20  
10 doi:10.1111/j.1610-0387.2007.06540.x.  
11  
12 12 De Vet HCW, Terwee CB, Mokkink LB, et al. Measurement in Medicine. A Practical Guide.  
13 Cambridge: Cambridge University Press 2011.  
14  
15 13 Beaton DE, Bombardier C, Guillemin F, et al. Guidelines for the Process of Cross-Cultural  
16 Adaptation of Self-Report Measures. *Spine* 2000;25:3186-91 doi:10.1097/00007632-200012150-  
17 00014.  
18  
19  
20 14 Van der Kluit MJ, Dijkstra GJ, de Rooij S,E. Goals of older hospitalised patients: a qualitative  
21 descriptive study. *BMJ open* 2019;9:e029993- doi:10.1136/bmjopen-2019-029993.  
22  
23 15 Pool JJM, Hiralal S, Ostelo, Raymond W J G, et al. Added value of qualitative studies in the  
24 development of health related patient reported outcomes such as the Pain Coping and Cognition List  
25 in patients with sub-acute neck pain. *Man Ther* 2010;15:43-7 doi:10.1016/j.math.2009.05.010.  
26  
27  
28 16 Van Der Veer K, Ommundsen R, Hak T, et al. Meaning Shift of Items in Different Language  
29 Versions. A Cross-National Validation Study of the Illegal Aliens Scale. *Quality and Quantity*  
30 2003;37:193-206.  
31  
32  
33 17 Wiering B, de Boer D, Delnoij D. Patient involvement in the development of patient-reported  
34 outcome measures: a scoping review. *Health Expect* 2017;20:11-23 doi:10.1111/hex.12442 [doi].  
35  
36 18 Stolee P, Rockwood K, Fox RA, et al. The use of goal attainment scaling in a geriatric care setting. *J*  
37 *Am Geriatr Soc* 1992;40:574-8.  
38  
39  
40 19 Toto PE, Skidmore ER, Terhorst L, et al. Goal Attainment Scaling (GAS) in geriatric primary care: a  
41 feasibility study. *Arch Gerontol Geriatr* 2015;60:16-21 doi:10.1016/j.archger.2014.10.022 [doi].  
42  
43 20 Jansen H, Hak T. The Productivity of the Three-step Test-interview (TSTI) Compared to an Expert  
44 Review of a Self-administered Questionnaire on Alcohol Consumption. *Journal of official statistics*  
45 2005;21:103-20.  
46  
47 21 Liu RD, Buffart LM, Kersten MJ, et al. Psychometric properties of two physical activity  
48 questionnaires, the AQuAA and the PASE, in cancer patients. *BMC Med Res Methodol*  
49 2011;11:30,2288-11-30 doi:10.1186/1471-2288-11-30 [doi].  
50  
51  
52 22 van Alphen A, Westerman MJ, Visschedijk JH, et al. A qualitative study of Falls Efficacy Scale-  
53 International/Hips. What do we measure?. *Tijdschr Gerontol Geriatr* 2013;44:3-11  
54 doi:10.1007/s12439-013-0005-9 [doi].  
55  
56  
57  
58  
59  
60

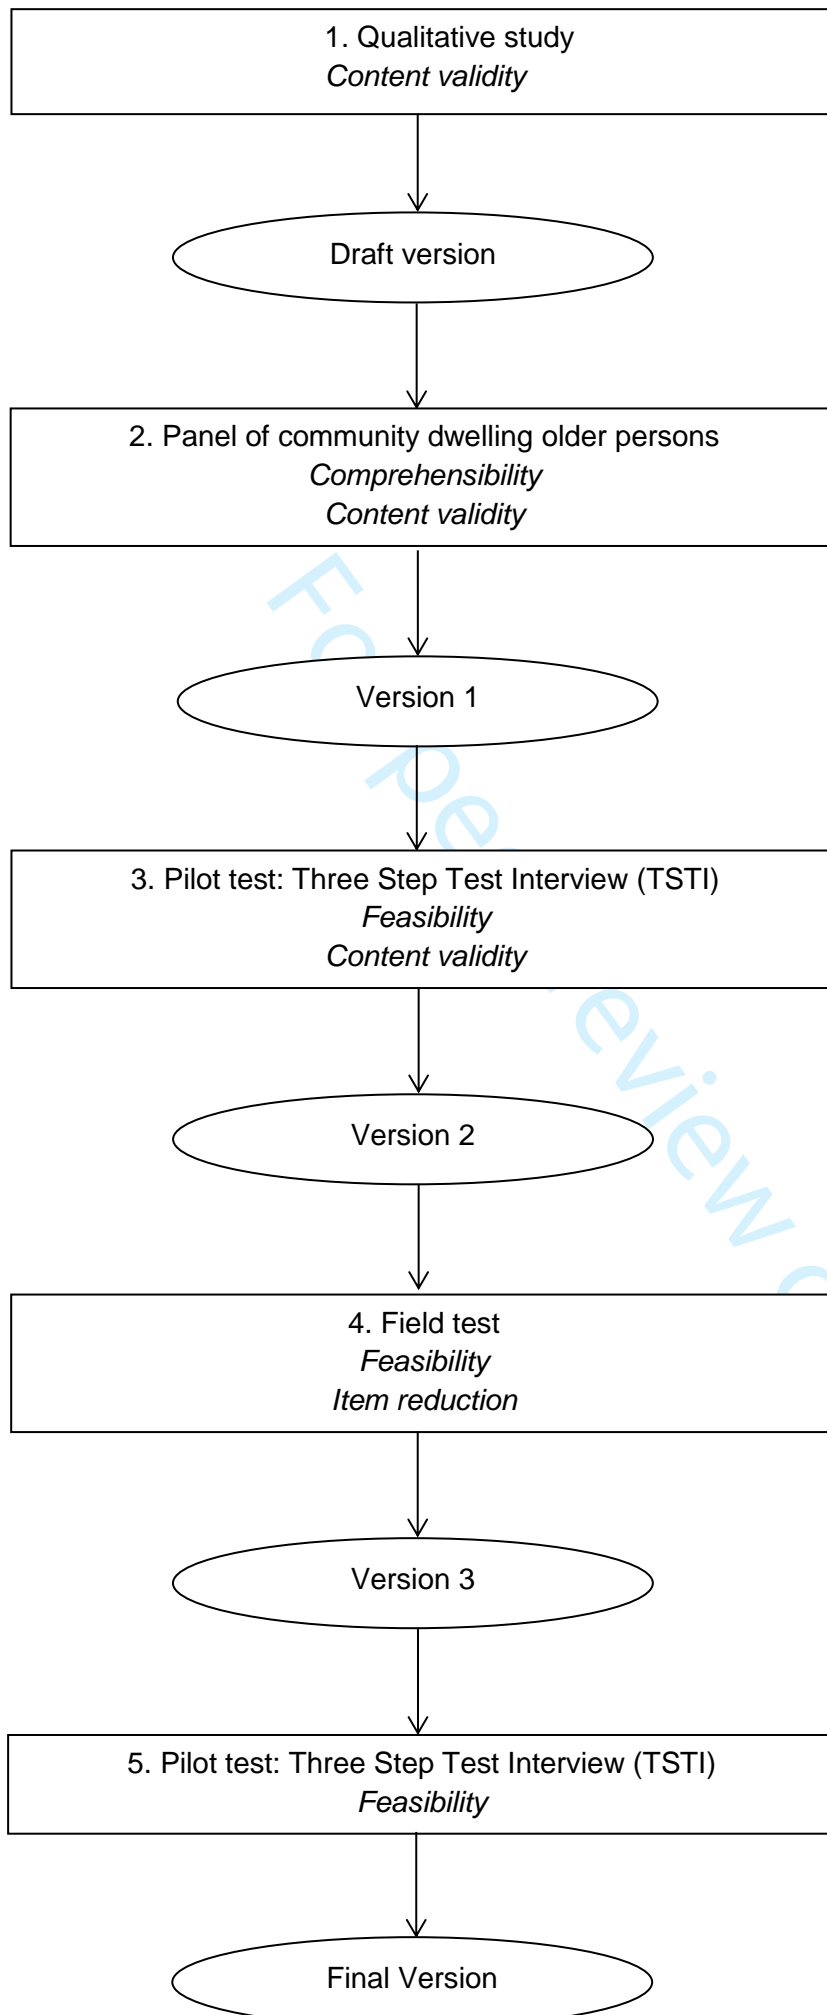

## Appendix 1. Version 1. Patient Benefit Assessment Scale

### Hospitalisation goals

The following questions cover how important the goals below are for you during your current hospitalisation.

Can you indicate how important each goal below is for you? You can choose from: 'not at all', 'somewhat', 'moderately', 'quite', or 'very'. If a goal doesn't apply to you, for example because you don't have difficulty with the listed problem (for example with bowel movements, or shortness of breath) or because you don't have a garden, then choose 'does not apply to me'.

|    | How important is it for you that through this hospitalisation... | Not at all | Somewhat | Moderately | Quite | Very | Does not apply to me |
|----|------------------------------------------------------------------|------------|----------|------------|-------|------|----------------------|
| 1  | You feel better                                                  |            |          |            |       |      |                      |
| 2  | You regain weight                                                |            |          |            |       |      |                      |
| 3  | Your condition improves                                          |            |          |            |       |      |                      |
| 4  | You have more energy                                             |            |          |            |       |      |                      |
| 5  | You can walk better                                              |            |          |            |       |      |                      |
| 6  | You move easier                                                  |            |          |            |       |      |                      |
| 7  | You can do housework                                             |            |          |            |       |      |                      |
| 8  | You can cook                                                     |            |          |            |       |      |                      |
| 9  | You can do the groceries                                         |            |          |            |       |      |                      |
| 10 | You can garden                                                   |            |          |            |       |      |                      |
| 11 | You can take pleasure in eating                                  |            |          |            |       |      |                      |
| 12 | You can wash and dress yourself                                  |            |          |            |       |      |                      |
| 13 | You can exercise or participate in sports                        |            |          |            |       |      |                      |
| 14 | You have no pain                                                 |            |          |            |       |      |                      |
| 15 | You have normal bowel movements                                  |            |          |            |       |      |                      |
| 16 | You have less shortness of breath                                |            |          |            |       |      |                      |
| 17 | Your disease is under control                                    |            |          |            |       |      |                      |
| 18 | You remain alive                                                 |            |          |            |       |      |                      |
| 19 | You can enjoy life                                               |            |          |            |       |      |                      |
| 20 | You regain your freedom                                          |            |          |            |       |      |                      |
| 21 | You can resume your (volunteer) work                             |            |          |            |       |      |                      |
| 22 | You can go on outings                                            |            |          |            |       |      |                      |
| 23 | You can visit friends or family                                  |            |          |            |       |      |                      |
| 24 | You can take a short break                                       |            |          |            |       |      |                      |
| 25 | You know the cause of your complaints                            |            |          |            |       |      |                      |
| 26 | You can go back home                                             |            |          |            |       |      |                      |
| 27 | You regain your independence                                     |            |          |            |       |      |                      |

### Evaluation of hospitalisation goals

In the beginning of your hospitalisation you indicated how important various goals for you were. Can you indicate for each of the goals below how much the hospitalisation has helped to achieving the goal? You can indicate whether the hospitalisation helped you 'not at all', 'somewhat', 'moderately' 'quite', or 'very'. If a goal didn't apply to you, for example because you didn't have difficulty with the listed problem (for example with bowel movements, or shortness of breath) or because you have no garden, then choose 'did not apply to me'.

|    | The hospitalisation helped me to...         | Not at all | Somewhat | Moderately | Quite | Very | Did not apply to me |
|----|---------------------------------------------|------------|----------|------------|-------|------|---------------------|
| 1  | Feel better                                 |            |          |            |       |      |                     |
| 2  | Regain weight                               |            |          |            |       |      |                     |
| 3  | Improve my condition                        |            |          |            |       |      |                     |
| 4  | Have more energy                            |            |          |            |       |      |                     |
| 5  | Walk better                                 |            |          |            |       |      |                     |
| 6  | Move easier                                 |            |          |            |       |      |                     |
| 7  | Do the housework                            |            |          |            |       |      |                     |
| 8  | Cook                                        |            |          |            |       |      |                     |
| 9  | Do the groceries                            |            |          |            |       |      |                     |
| 10 | Garden                                      |            |          |            |       |      |                     |
| 11 | Take pleasure in eating                     |            |          |            |       |      |                     |
| 12 | Wash and dress myself                       |            |          |            |       |      |                     |
| 13 | Exercise or Participate in sports           |            |          |            |       |      |                     |
| 14 | Have no pain                                |            |          |            |       |      |                     |
| 15 | Have normal bowel movements                 |            |          |            |       |      |                     |
| 16 | Have less shortness of breath               |            |          |            |       |      |                     |
| 17 | Keep my disease under control               |            |          |            |       |      |                     |
| 18 | Remain alive                                |            |          |            |       |      |                     |
| 19 | Enjoy life                                  |            |          |            |       |      |                     |
| 20 | Regain my freedom                           |            |          |            |       |      |                     |
| 21 | Resume my volunteer work                    |            |          |            |       |      |                     |
| 22 | Go on outings                               |            |          |            |       |      |                     |
| 23 | Visit family or friends                     |            |          |            |       |      |                     |
| 24 | Can take a short break                      |            |          |            |       |      |                     |
| 25 | Know what the cause of my complaints is/was |            |          |            |       |      |                     |
| 26 | Go back to my home                          |            |          |            |       |      |                     |
| 27 | Regain my independence                      |            |          |            |       |      |                     |

## Appendix 2. Final Version Patient Benefit Assessment Scale

### Hospitalisation Goals

People differ in what they wish to achieve with a hospitalisation. They have different goals. This depends on what they suffer from, what they are hospitalised for, and what they find important in life.

I am now going to mention some subjects that may be important to you during this hospitalisation. Can you say whether each applies to you?

A subject applies to you if you experience or anticipate problems or limitations and this applies to your life. For people who, for example, are short of breath, the subject shortness of breath probably applies, but not for others. For others they may be struggling to enjoy life because of their illness, but if you experience no problems with it, then this doesn't apply to you.

*Instruction for the interviewer: Circle the number for the subject that applies to the participant.*

*If a participant asks what you mean by a subject, say:*

*Are you experiencing problems with [subject] now, or when you were admitted, or are you expecting problems with it because of your illness or hospitalisation?*

*For the functional subjects, prefer not to use the word 'problem', but rather 'trouble' or 'limitation'.*

Now follow the subjects, you should indicate whether each subject applies to you or not:

1. Wanting to feel better

*Explanation if necessary: do you feel sick or miserable and would you like to feel better?*

2. Energy

3. Pain

4. Bowel movements

5. Shortness of breath

6. Walking

7. Appetite

8. Unclear about what is wrong with me

*Explanation if necessary: you may be wondering what is wrong with you. If this was already clear for you when you were admitted then this does not apply.*

9. Controlling my disease

*Explanation if necessary: Do you suffer from a disease that needs to be controlled?*

10. Remain alive

*Explanation if necessary: Was your life in danger when you were admitted or do you think that this hospitalisation must contribute to remain alive?*

11. Enjoying life

12. Housework

13. Groceries

14. Washing and dressing myself

15. Gardening

16. Exercise or Sports

17. Hobbies

18. Driving

19. Going on outings

20. Visiting family or friends

1  
2  
3 21. Return back to my home

4 *Explanation if necessary: Are you unsure whether you can return to your own home?*

5  
6 22. Independence

7 23. Are there other themes which are important to you during this hospitalisation that I have not  
8 mentioned yet? If so, which?  
9

10  
11 Now that we have identified the themes that apply to you, I am going to ask to what extent they are  
12 goals during this hospitalisation.  
13

14  
15 Can you indicate for each goal that I mention how important it is during this hospitalisation? You can  
16 choose from 'not at all important', 'moderately important' 'quite important', or 'very important'.  
17

18  
19 For some goals you may still say that they do not apply, for example because they do not matter  
20 during this hospitalisation. Then you indicate "does not apply to me now".  
21

22  
23 *Instruction to interviewer: Read only the goals which you have circled.*  
24  
25  
26  
27  
28  
29  
30  
31  
32  
33  
34  
35  
36  
37  
38  
39  
40  
41  
42  
43  
44  
45  
46  
47  
48  
49  
50  
51  
52  
53  
54  
55  
56  
57  
58  
59  
60

|    |                                                                                                                   | does<br>not apply<br>to me now | not at all<br>important  | somewhat<br>important    | quite<br>important       | very<br>important        |
|----|-------------------------------------------------------------------------------------------------------------------|--------------------------------|--------------------------|--------------------------|--------------------------|--------------------------|
| 1  | How important is it for you that you <b>feel better again</b> as a result of this hospitalisation                 | <input type="checkbox"/>       | <input type="checkbox"/> | <input type="checkbox"/> | <input type="checkbox"/> | <input type="checkbox"/> |
| 2  | How important is it for you that you <b>have more energy</b> as a result of this hospitalisation                  | <input type="checkbox"/>       | <input type="checkbox"/> | <input type="checkbox"/> | <input type="checkbox"/> | <input type="checkbox"/> |
| 3  | How important is it for you that you <b>have less pain</b> as a result of this hospitalisation                    | <input type="checkbox"/>       | <input type="checkbox"/> | <input type="checkbox"/> | <input type="checkbox"/> | <input type="checkbox"/> |
| 4  | How important is it for you that you <b>have normal bowel movements again</b> as a result of this hospitalisation | <input type="checkbox"/>       | <input type="checkbox"/> | <input type="checkbox"/> | <input type="checkbox"/> | <input type="checkbox"/> |
| 5  | How important is it for you that you <b>are less short of breath</b> as a result of this hospitalisation          | <input type="checkbox"/>       | <input type="checkbox"/> | <input type="checkbox"/> | <input type="checkbox"/> | <input type="checkbox"/> |
| 6  | How important is it for you that you can <b>walk better again</b> as a result of this hospitalisation             | <input type="checkbox"/>       | <input type="checkbox"/> | <input type="checkbox"/> | <input type="checkbox"/> | <input type="checkbox"/> |
| 7  | How important is it for you that you <b>regain your appetite</b> as a result of this hospitalisation              | <input type="checkbox"/>       | <input type="checkbox"/> | <input type="checkbox"/> | <input type="checkbox"/> | <input type="checkbox"/> |
| 8  | How important is it for you that you <b>know what is wrong with you</b> as a result of this hospitalisation       | <input type="checkbox"/>       | <input type="checkbox"/> | <input type="checkbox"/> | <input type="checkbox"/> | <input type="checkbox"/> |
| 9  | How important is it for you that <b>your disease is under control</b> as a result of this hospitalisation         | <input type="checkbox"/>       | <input type="checkbox"/> | <input type="checkbox"/> | <input type="checkbox"/> | <input type="checkbox"/> |
| 10 | How important is it for you that you <b>remain alive</b> as a result of this hospitalisation                      | <input type="checkbox"/>       | <input type="checkbox"/> | <input type="checkbox"/> | <input type="checkbox"/> | <input type="checkbox"/> |
| 11 | How important is it for you that you can <b>enjoy life again</b> as a result of this hospitalisation              | <input type="checkbox"/>       | <input type="checkbox"/> | <input type="checkbox"/> | <input type="checkbox"/> | <input type="checkbox"/> |
| 12 | How important is it for you that you can <b>do housework again</b> as a result of this hospitalisation            | <input type="checkbox"/>       | <input type="checkbox"/> | <input type="checkbox"/> | <input type="checkbox"/> | <input type="checkbox"/> |

|    |                                                                                                                                 | does<br>not apply<br>to me now | not at all<br>important  | somewhat<br>important    | quite<br>important       | very<br>important        |
|----|---------------------------------------------------------------------------------------------------------------------------------|--------------------------------|--------------------------|--------------------------|--------------------------|--------------------------|
| 13 | How important is it for you that you can <b>do the groceries again</b> as a result of this hospitalisation                      | <input type="checkbox"/>       | <input type="checkbox"/> | <input type="checkbox"/> | <input type="checkbox"/> | <input type="checkbox"/> |
| 14 | How important is it for you that you <b>can wash and dress yourself again</b> as a result of this hospitalisation               | <input type="checkbox"/>       | <input type="checkbox"/> | <input type="checkbox"/> | <input type="checkbox"/> | <input type="checkbox"/> |
| 15 | How important is it for you that you <b>can garden again</b> as a result of this hospitalisation                                | <input type="checkbox"/>       | <input type="checkbox"/> | <input type="checkbox"/> | <input type="checkbox"/> | <input type="checkbox"/> |
| 16 | How important is it for you that you <b>can exercise or participate in sports again</b> as a result of this hospitalisation     | <input type="checkbox"/>       | <input type="checkbox"/> | <input type="checkbox"/> | <input type="checkbox"/> | <input type="checkbox"/> |
| 17 | How important is it for you that you <b>can exercise your hobbies again</b> as a result of this hospitalisation                 | <input type="checkbox"/>       | <input type="checkbox"/> | <input type="checkbox"/> | <input type="checkbox"/> | <input type="checkbox"/> |
| 18 | How important is it for you that you <b>can drive again</b> as a result of this hospitalisation                                 | <input type="checkbox"/>       | <input type="checkbox"/> | <input type="checkbox"/> | <input type="checkbox"/> | <input type="checkbox"/> |
| 19 | How important is it for you that you <b>go on outings again</b> as a result of this hospitalisation                             | <input type="checkbox"/>       | <input type="checkbox"/> | <input type="checkbox"/> | <input type="checkbox"/> | <input type="checkbox"/> |
| 20 | How important is it for you that you <b>can visit family or friends again</b> as a result of this hospitalisation               | <input type="checkbox"/>       | <input type="checkbox"/> | <input type="checkbox"/> | <input type="checkbox"/> | <input type="checkbox"/> |
| 21 | How important is it for you that you <b>can return to your own home again</b> as a result of this hospitalisation               | <input type="checkbox"/>       | <input type="checkbox"/> | <input type="checkbox"/> | <input type="checkbox"/> | <input type="checkbox"/> |
| 22 | How important is it for you that you <b>regain your independence</b> as a result of this hospitalisation                        | <input type="checkbox"/>       | <input type="checkbox"/> | <input type="checkbox"/> | <input type="checkbox"/> | <input type="checkbox"/> |
| 23 | How important is it for you that you _____ as a result of this hospitalisation                                                  | <input type="checkbox"/>       | <input type="checkbox"/> | <input type="checkbox"/> | <input type="checkbox"/> | <input type="checkbox"/> |
| 24 | Do you have any goals I haven't mentioned yet? If so: How important is it to you that _____ as a result of this hospitalisation | <input type="checkbox"/>       | <input type="checkbox"/> | <input type="checkbox"/> | <input type="checkbox"/> | <input type="checkbox"/> |



1  
2  
3  
4  
5  
6  
7  
8  
9  
10  
11  
12  
13  
14  
15  
16  
17  
18  
19  
20  
21  
22  
23  
24  
25  
26  
27  
28  
29  
30  
31  
32  
33  
34  
35  
36  
37  
38  
39  
40  
41  
42  
43  
44  
45  
46

**Evaluation of hospitalisation goals**

In the beginning of your hospitalisation you indicated how important various goals for you were. A goal is something you want to achieve with a hospitalisation. Some goals you may have achieved, others maybe not or not entirely.

Can you indicate for each of the goals below how much the hospitalisation has helped to achieving the goal? You can indicate whether the hospitalisation has helped you 'not at all', 'moderately', 'quite', or 'completely'.

*Only the goals which applied at baseline are evaluated with the participant.*

|    |                                                                           | Not at all               | Somewhat                 | Quite                    | Completely               |
|----|---------------------------------------------------------------------------|--------------------------|--------------------------|--------------------------|--------------------------|
| 1  | Because of the hospitalisation I <b>feel better again</b>                 | <input type="checkbox"/> | <input type="checkbox"/> | <input type="checkbox"/> | <input type="checkbox"/> |
| 2  | Because of the hospitalisation I have <b>more energy</b>                  | <input type="checkbox"/> | <input type="checkbox"/> | <input type="checkbox"/> | <input type="checkbox"/> |
| 3  | Because of the hospitalisation I have <b>no more pain</b>                 | <input type="checkbox"/> | <input type="checkbox"/> | <input type="checkbox"/> | <input type="checkbox"/> |
| 4  | Because of the hospitalisation I have <b>normal bowel movements again</b> | <input type="checkbox"/> | <input type="checkbox"/> | <input type="checkbox"/> | <input type="checkbox"/> |
| 5  | Because of the hospitalisation I am <b>less short of breath</b>           | <input type="checkbox"/> | <input type="checkbox"/> | <input type="checkbox"/> | <input type="checkbox"/> |
| 6  | Because of the hospitalisation I <b>walk better again</b>                 | <input type="checkbox"/> | <input type="checkbox"/> | <input type="checkbox"/> | <input type="checkbox"/> |
| 7  | Because of the hospitalisation I <b>regained appetite</b>                 | <input type="checkbox"/> | <input type="checkbox"/> | <input type="checkbox"/> | <input type="checkbox"/> |
| 8  | Because of the hospitalisation I <b>know what is/ was wrong with me</b>   | <input type="checkbox"/> | <input type="checkbox"/> | <input type="checkbox"/> | <input type="checkbox"/> |
| 9  | Because of the hospitalisation <b>my disease is under control</b>         | <input type="checkbox"/> | <input type="checkbox"/> | <input type="checkbox"/> | <input type="checkbox"/> |
| 10 | Because of the hospitalisation I <b>remained alive</b>                    | <input type="checkbox"/> | <input type="checkbox"/> | <input type="checkbox"/> | <input type="checkbox"/> |
| 11 | Because of the hospitalisation I <b>enjoy life again</b>                  | <input type="checkbox"/> | <input type="checkbox"/> | <input type="checkbox"/> | <input type="checkbox"/> |
| 12 | Because of the hospitalisation I <b>do my housework again</b>             | <input type="checkbox"/> | <input type="checkbox"/> | <input type="checkbox"/> | <input type="checkbox"/> |
| 13 | Because of the hospitalisation I <b>do the groceries again</b>            | <input type="checkbox"/> | <input type="checkbox"/> | <input type="checkbox"/> | <input type="checkbox"/> |
| 14 | Because of the hospitalisation I <b>wash and dress myself again</b>       | <input type="checkbox"/> | <input type="checkbox"/> | <input type="checkbox"/> | <input type="checkbox"/> |
| 15 | Because of the hospitalisation I <b>garden again</b>                      | <input type="checkbox"/> | <input type="checkbox"/> | <input type="checkbox"/> | <input type="checkbox"/> |
| 16 | Because of the hospitalisation I <b>participate in sports again</b>       | <input type="checkbox"/> | <input type="checkbox"/> | <input type="checkbox"/> | <input type="checkbox"/> |

|    |                                                                       | Not at all               | Somewhat                 | Quite                    | Completely               |
|----|-----------------------------------------------------------------------|--------------------------|--------------------------|--------------------------|--------------------------|
| 17 | Because of the hospitalisation I <b>can resumed my hobbies</b>        | <input type="checkbox"/> | <input type="checkbox"/> | <input type="checkbox"/> | <input type="checkbox"/> |
| 18 | Because of the hospitalisation I <b>drive again</b>                   | <input type="checkbox"/> | <input type="checkbox"/> | <input type="checkbox"/> | <input type="checkbox"/> |
| 19 | Because of the hospitalisation I <b>go on outings again</b>           | <input type="checkbox"/> | <input type="checkbox"/> | <input type="checkbox"/> | <input type="checkbox"/> |
| 20 | Because of the hospitalisation I <b>visit family or friends again</b> | <input type="checkbox"/> | <input type="checkbox"/> | <input type="checkbox"/> | <input type="checkbox"/> |
| 21 | Because of the hospitalisation I <b>am back in my own home</b>        | <input type="checkbox"/> | <input type="checkbox"/> | <input type="checkbox"/> | <input type="checkbox"/> |
| 22 | Because of the hospitalisation I <b>regained independence</b>         | <input type="checkbox"/> | <input type="checkbox"/> | <input type="checkbox"/> | <input type="checkbox"/> |
| 23 | Because of the hospitalisation _____                                  | <input type="checkbox"/> | <input type="checkbox"/> | <input type="checkbox"/> | <input type="checkbox"/> |

# BMJ Open

## Development of a new tool for the assessment of patient defined benefit in hospitalised older patients: the Patient Benefit Assessment Scale for Hospitalised Older Patients (P-BAS HOP)

|                                 |                                                                                                                                                                                                                                                                                                                                                                                                                                                                                                                     |
|---------------------------------|---------------------------------------------------------------------------------------------------------------------------------------------------------------------------------------------------------------------------------------------------------------------------------------------------------------------------------------------------------------------------------------------------------------------------------------------------------------------------------------------------------------------|
| Journal:                        | <i>BMJ Open</i>                                                                                                                                                                                                                                                                                                                                                                                                                                                                                                     |
| Manuscript ID                   | bmjopen-2020-038203.R1                                                                                                                                                                                                                                                                                                                                                                                                                                                                                              |
| Article Type:                   | Original research                                                                                                                                                                                                                                                                                                                                                                                                                                                                                                   |
| Date Submitted by the Author:   | 07-Jul-2020                                                                                                                                                                                                                                                                                                                                                                                                                                                                                                         |
| Complete List of Authors:       | van der Kluit, Maria; University of Groningen, University Medical Center Groningen, University Center for Geriatric Medicine<br>Dijkstra, Geke; Department of Health Sciences, Applied Health Research van Munster, Barbara; University of Groningen, University Medical Center Groningen, University Center for Geriatric Medicine; Gelre Hospitals, Geriatrics<br>De Rooij, Sophia; University Medical Center Groningen, University Center for Geriatric Medicine; Medical Spectrum Twente, Medical School Twente |
| <b>Primary Subject Heading</b>: | Geriatric medicine                                                                                                                                                                                                                                                                                                                                                                                                                                                                                                  |
| Secondary Subject Heading:      | Communication, Health services research, Research methods                                                                                                                                                                                                                                                                                                                                                                                                                                                           |
| Keywords:                       | GERIATRIC MEDICINE, QUALITATIVE RESEARCH, Quality in health care < HEALTH SERVICES ADMINISTRATION & MANAGEMENT                                                                                                                                                                                                                                                                                                                                                                                                      |
|                                 |                                                                                                                                                                                                                                                                                                                                                                                                                                                                                                                     |

SCHOLARONE™  
Manuscripts



I, the Submitting Author has the right to grant and does grant on behalf of all authors of the Work (as defined in the below author licence), an exclusive licence and/or a non-exclusive licence for contributions from authors who are: i) UK Crown employees; ii) where BMJ has agreed a CC-BY licence shall apply, and/or iii) in accordance with the terms applicable for US Federal Government officers or employees acting as part of their official duties; on a worldwide, perpetual, irrevocable, royalty-free basis to BMJ Publishing Group Ltd ("BMJ") its licensees and where the relevant Journal is co-owned by BMJ to the co-owners of the Journal, to publish the Work in this journal and any other BMJ products and to exploit all rights, as set out in our [licence](#).

The Submitting Author accepts and understands that any supply made under these terms is made by BMJ to the Submitting Author unless you are acting as an employee on behalf of your employer or a postgraduate student of an affiliated institution which is paying any applicable article publishing charge ("APC") for Open Access articles. Where the Submitting Author wishes to make the Work available on an Open Access basis (and intends to pay the relevant APC), the terms of reuse of such Open Access shall be governed by a Creative Commons licence – details of these licences and which [Creative Commons](#) licence will apply to this Work are set out in our licence referred to above.

Other than as permitted in any relevant BMJ Author's Self Archiving Policies, I confirm this Work has not been accepted for publication elsewhere, is not being considered for publication elsewhere and does not duplicate material already published. I confirm all authors consent to publication of this Work and authorise the granting of this licence.

1  
2  
3 **Development of a new tool for the assessment of patient defined benefit in hospitalised older**  
4 **patients: the Patient Benefit Assessment Scale for Hospitalised Older Patients (P-BAS HOP)**  
5  
6  
7

8 **Authors:**  
9

- 10 1. Maria Johanna van der Kluit, MSc RN (Corresponding author)  
11  
12 University of Groningen, University Medical Center Groningen, University Center for Geriatric  
13  
14 Medicine, Hanzeplein 1, 9700 RB Groningen, The Netherlands  
15  
16 [m.j.van.der.kluit@umcg.nl](mailto:m.j.van.der.kluit@umcg.nl)  
17  
18 +31503613921  
19  
20  
21 2. Geke J. Dijkstra, PhD  
22  
23 University of Groningen, University Medical Center Groningen, Department of Health Sciences,  
24  
25 Applied Health Research, Groningen, The Netherlands  
26  
27 [g.j.dijkstra@umcg.nl](mailto:g.j.dijkstra@umcg.nl)  
28  
29  
30 3. Barbara C. van Munster, MD PhD  
31  
32 University of Groningen, University Medical Center Groningen, University Center for Geriatric  
33  
34 Medicine, Groningen, The Netherlands.  
35  
36 Department of Geriatrics, Gelre Hospitals, Apeldoorn, The Netherlands.  
37  
38 [b.c.van.munster@umcg.nl](mailto:b.c.van.munster@umcg.nl)  
39  
40  
41 4. Sophia E. de Rooij, MD PhD  
42  
43 University of Groningen, University Medical Center Groningen, University Center for Geriatric  
44  
45 Medicine, Groningen, The Netherlands  
46  
47 Medical Spectrum Twente, Medical School Twente, Enschede, The Netherlands  
48  
49  
50 [sejaderooij@gmail.com](mailto:sejaderooij@gmail.com)  
51

52 Words: 4692

53 Words abstract: 299

54 References: 26

55 Figures: 1

56 Tables: 4  
57  
58  
59  
60

## ABSTRACT

**Objectives:** To support the shift from disease-oriented towards goal-oriented care, we aimed to develop a tool which is capable both to identify priorities of an individual older hospitalised patient and to measure the outcomes relevant to him.

**Design:** Mixed methods design with open interviews, Three Step Test Interviews (TSTI), and a quantitative field test.

**Setting:** University teaching hospital and a regional teaching hospital.

**Participants:** Hospitalised patients ages 70 years and older.

**Results:** The Patient Benefit Assessment Scale for Hospitalised Older Patients (P-BAS HOP) consists of a baseline questionnaire and an evaluation questionnaire. Items were based on 15 qualitative interviews with hospitalised older patients. Feedback from a panel of four community-dwelling older persons resulted in some adaptations to wording and one additional item. Twenty-six hospitalised older patients participated in TSTIs with Version 1 of the baseline questionnaire, revealing indications for a good content validity and barriers in completion behaviour, global understanding, and understanding of individual items, which were solved with several adaptations. Four additions were made by participants. After TSTIs with ten patients with the evaluation questionnaire, one adaptation was made. A field test with 91 hospitalised older patients revealed a small number of missing values.

To enhance the feasibility, the number of items was reduced from 32 to 23, based on correlations and mean impact score. The field test was repeated with 104 other patients in a regional teaching hospital. To enhance the understanding, the tool was split into two phases. This version was tested with TSTIs with eight patients and appeared to be understandable. The final version was an interview-based tool and took about 11 minutes to complete.

**Conclusions:** The P-BAS HOP is a potentially suitable tool to identify priorities and relevant outcomes of the individual patient. Further research is needed to investigate its validity, reliability and responsiveness.

**Keywords** Geriatric medicine; Older adults; Hospitalisation; Patient perspective; Goal setting; Patient-reported outcomes; Tool; Value-Based Health Care

## ARTICLE SUMMARY

### Strengths and limitations of this study

- The content of the P-BAS HOP is based on open interviews with hospitalised older patients.
- Patients are able to indicate their individual outcome priorities.

- 1  
2  
3 ● The P-BAS HOP is tested intensively in the target population with Three Step Test Interviews. This  
4 gave valuable insights into the understanding of the tool and the completion behaviour of the  
5 participants.  
6  
7  
8 ● The current version of the P-BAS HOP is only suitable to be completed with an interviewer and  
9 not as a self-administered questionnaire.  
10  
11 ● It is unknown whether the P-BAS HOP is feasible in other healthcare systems, languages and  
12 cultures than in the Netherlands.  
13  
14  
15  
16  
17  
18  
19  
20  
21  
22  
23  
24  
25  
26  
27  
28  
29  
30  
31  
32  
33  
34  
35  
36  
37  
38  
39  
40  
41  
42  
43  
44  
45  
46  
47  
48  
49  
50  
51  
52  
53  
54  
55  
56  
57  
58  
59  
60

For peer review only

## BACKGROUND

To fit the needs of the ageing population, and patients with multiple chronic diseases, a shift is recommended from disease-oriented towards goal-oriented care. Older patients with multimorbidity may be more interested in more personal goals such as for them important symptoms, functional status and social functioning than in traditional outcomes such as survival and biomarkers,<sup>1, 2</sup> but these goals and outcomes differ per individual.<sup>3, 4</sup> When care would be systematically evaluated by personal goal-oriented outcomes, a tool is needed which is capable both to identify the priorities of the individual patient and to measure the outcomes relevant to him.

Three literature reviews<sup>5-7</sup> into tools used to assess patient outcome priorities in the context of multimorbidity revealed a few potentially useful tools. Tools only suitable for specific activities, such as the Canadian Occupational Performance Measure (COPM),<sup>5, 7</sup> Self-Identified Goals Assessment (SIGA),<sup>7</sup> Assessment of Motor and Process Skills (AMPS) and McMaster Toronto Arthritis (MACTAR)<sup>5</sup> were ignored. A general tool is the Outcome Prioritization Instrument,<sup>6, 8</sup> which is suitable to elicit four patient priorities, but these priorities are still very global and it remains unclear how to evaluate them after treatment. Another tool is the Goal Attainment Scaling (GAS)<sup>5, 7</sup> which is designed to set and evaluate individualized goals and outcomes. Disadvantages of the GAS are that it can be too challenging for patients to articulate their own goals and that it is time consuming.<sup>9</sup> The International Classification of Functioning, Disability and Health (ICF) framework for goal setting is used to categorize patient goals set in semi-structured interviews, but has still the same disadvantages as the GAS and has, in addition, a very poor responsiveness.<sup>7</sup> Finally, with the Target Complaints,<sup>5</sup> the patient defines target complaints as those problems for which help was sought. These complaints are scored at the beginning and at the end of the treatment by the patient, or the patient rates the degree of improvement.<sup>10, 11</sup> The Target Complaints is individualized and patient-centred. However, it focuses solely on problems and not on goals. Disadvantages for the GAS, ICF and Target Complaints could be that for some older patients it might be difficult to formulate their own goals and problems because many older persons are not accustomed to defining and discussing personal goals and prompting is often necessary.<sup>12</sup> The quality of the answers is therefore dependent on the interviewer's experiences and techniques.

For this reason, another method of defining patient-defined goals and outcomes was sought and found in the literature about treatment of acne. Augustin et al.<sup>13</sup> developed a tool consisting of two parts: 1) a baseline questionnaire to assess the importance of various predefined goals, based on themes derived from qualitative interviews in patients with acne and 2) an evaluation questionnaire to evaluate the extent to which treatment helped to achieve these goals. Based on these data it is possible to compute an individual Patient Benefit Index. This is an overall value between 0 (no benefit) and 4 (maximal benefit), which reflects the achievement of the goals weighted by the



1  
2  
3 importance.<sup>13</sup> The advantage of this tool is the insight into the individualized patient perspective,  
4 together with standardisation.

5  
6 The aim of this study was to develop a tool to inventory individual goals and benefits of older  
7 hospitalised patients, based on the model of Augustin et al.<sup>13</sup> This article presents its development,  
8 early testing and adaptations.  
9  
10

## 11 12 13 **METHODS**

14  
15 The steps used to develop the Patient Benefit Assessment Scale for Hospitalised Older Patients (P-  
16 BAS HOP) are based on the steps of De Vet et al.<sup>14</sup> and outlined in Figure 1. After each step, the tool  
17 was adapted. The steps are explained in the following sections. For the readability, the methods and  
18 results of each step are alternated. The P-BAS was developed and tested in Dutch. The P-BAS was  
19 translated into English in a translation - back translation procedure involving four translators (two  
20 native English, two native Dutch), a language professional and authors MJvdK and GD.<sup>15</sup>  
21  
22  
23  
24  
25

### 26 **Patient and public involvement**

27  
28 Patients and public were involved in the generation of the items, the importance and relevance of  
29 the items and the assessment of the feasibility and understanding of the tool.  
30  
31  
32

33  
34 Figure 1. Development of the P-BAS HOP

#### 35 36 **1. Qualitative study**

37  
38 Firstly, open interviews with hospitalised older medical and surgical patients about their goals  
39 regarding their hospitalisation were performed. The description of these goals is published  
40 elsewhere.<sup>3</sup> These goals were then coded inductively and transformed into questionnaire items, and  
41 the first draft of the P-BAS HOP was then constructed, consisting of a baseline questionnaire and an  
42 evaluation questionnaire.  
43  
44  
45  
46  
47

#### 48 **2. Panel of community-dwelling older persons**

49  
50 The first draft version was proposed by e-mail to a panel of community-dwelling older persons to  
51 assess the comprehensibility and relevance of the items and the tool and ask for omissions or  
52 redundancies.  
53  
54  
55

### 56 **Results**

57  
58 Four community-dwelling older persons gave written feedback on the draft version of the tool. This  
59 led to adaptation in wording of the introduction text and to some items which were not clear enough  
60

1  
2  
3 or could be interpreted in multiple ways. An example of an item that was adapted: for the item 'to be  
4 able to eat', it was not clear if it concerned the instrumental activity of eating or concerned appetite.  
5 Therefore, the item was changed into 'can take pleasure in eating'.  
6  
7  
8 Further, one additional item was added, namely 'to wash and dress yourself' and the sequence of  
9  
10 two items was changed. Version 1 of the P-BAS HOP is shown in Appendix 1.  
11  
12

### 13 **3. Pilot test: Three Step Test Interview (TSTI).**

14  
15 The adapted tool (Version 1, Appendix 1) was tested with the TSTI<sup>16, 17</sup> in older hospitalised patients.  
16 The TSTI is a type of cognitive interview suitable to assess how people interpret a questionnaire, its  
17 different items and what kind of strategies they use in responding to them. The TSTI consists of the  
18 following steps:  
19

#### 20 Step 1: Concurrent thinking aloud

21  
22 The participant completed version 1 of the P-BAS HOP while thinking aloud. The interviewer  
23 observed, made notes of the participant's behaviour (hesitations, skipping questions, corrections)  
24 and verbalized thoughts. However, the interviewer did not talk, or intervene. The instructions for the  
25 participant were: Please fill in this questionnaire and try to think aloud about what your thoughts are  
26 while reading the questions and choosing the right response category.  
27  
28  
29

#### 30 Step 2: Retrospective interview

31  
32 With the retrospective interview any gaps from the first step were filled in. Every behaviour and  
33 thought from the observation of which the interviewer wanted further information, was clarified.  
34  
35

#### 36 Step 3: Semi-structured interview

37  
38 An in-depth interview was conducted, aimed at eliciting the participant's considerations and  
39 opinions. The participant was given the opportunity to explain behaviour, actions or thoughts that he  
40 had in the previous steps. The participant was asked how he understood different items, was asked  
41 for any omissions and his opinion about filling in the questionnaire. The participant was also asked  
42 to explain his goals in his own words in order to perform a first content validation of the P-BAS HOP.  
43  
44  
45  
46  
47

#### 48 Participants

49  
50 Eligible participants of the TSTI were 70 years and older; planned or unplanned hospitalised on  
51 medical or surgical wards of a university teaching hospital in the Netherlands; able to speak and  
52 understand Dutch and were without cognitive impairment. Inclusion criteria were verified with the  
53 staff nurse, and patients were then approached by the interviewer (MJvdK). Participants were  
54 completely anonymous, no list with names or other identifying data was made, nor did the  
55 researchers have access to medical records. Participants gave verbal consent to the interview and  
56 audio recording.  
57  
58  
59  
60

## Data analysis

Data gathering and data analysis were alternated. Interviews were audio recorded and transcribed verbatim. All remarks were then organised by question and step. After that, the data were coded by MJvdK and grouped into categories. The tool was adapted several times after the feedback until it was considered feasible and understandable.

The TSTI was repeated with the evaluation questionnaire. This was done at patient discharge.

## Results

### Sample baseline questionnaire

Twenty-six older hospitalised patients participated in the TSTI. Characteristics of the participants are displayed in the second column of Table 1.

Table 1. Participants Three Steps Test Interview (TSTI) baseline questionnaire version 1, evaluation questionnaire version 1 and baseline questionnaire version 3.

|                    | Baseline questionnaire version 1 (n=26) | Evaluation questionnaire version 1 (n=10) | Baseline questionnaire version 3 (n=8) |
|--------------------|-----------------------------------------|-------------------------------------------|----------------------------------------|
| Characteristic     | n                                       | n                                         | n                                      |
| Gender             |                                         |                                           |                                        |
| Male               | 19                                      | 8                                         | 4                                      |
| Female             | 7                                       | 2                                         | 4                                      |
| Age (years)        |                                         |                                           |                                        |
| 70-79              | 18                                      | 8                                         | 7                                      |
| 80-89              | 7                                       | 2                                         | 0                                      |
| 90-99              | 1                                       | 0                                         | 1                                      |
| Native language    |                                         |                                           |                                        |
| Dutch              | 14                                      | 7                                         | 7                                      |
| Local dialect      | 10                                      | 2                                         | 1                                      |
| Frisian            | 2                                       | 0                                         | 0                                      |
| Foreign language   | 0                                       | 1                                         | 0                                      |
| Educational level* |                                         |                                           |                                        |
| Low                | 8                                       | 5                                         | 2                                      |

|                      |    |   |   |
|----------------------|----|---|---|
| Middle               | 10 | 4 | 5 |
| High                 | 8  | 1 | 1 |
| Admission reason†    |    |   |   |
| Cardiac problems     | 9  | 1 | 1 |
| Pulmonary problems   | 7  | 3 | 2 |
| Bowel problems       | 2  | 2 | 1 |
| Fever/ infection     | 2  | 2 | 0 |
| Vascular surgery     | 2  | 1 | 0 |
| Cancer               | 2  | 0 | 0 |
| Accident/fracture(s) | 2  | 0 | 1 |
| Kidney problems      | 0  | 1 | 1 |
| Syncope              | 0  | 0 | 1 |
| Ulcers               | 0  | 0 | 1 |

\* Definition educational level: Low= no education, primary school, basic vocational training; Middle = secondary education, vocational training; High = bachelor, master

† Reason according to the patient

#### Coding categories

The codes were sorted into the following categories: Completion behaviour, Global understanding, Understanding and reactions regarding individual items, Additions, General evaluation, and Content validity.

#### *Completion behaviour*

With 'completion behaviour' is meant the behaviour participants showed when completing the questionnaire. Observations revealed that many participants skipped the instruction text partly or even completely. For some participants, reading these instructions was demanding, others did not understand how a table works and where to place a mark. Adding an example table with instructions showing how and where to place a mark brought no improvements. In the final version boxes to tick were included in the table.

#### *Global understanding*

Many examples of correct understanding were coded. For example:

*Item regaining weight, step 1: Oops, dear, pooh, let's see, that is certainly important, because I have lost weight lately since I had not been feeling well for a while, that is, not*

1  
2  
3 *shortness of breath or anything, but, very tired, listless. So, a little weight gain is important.*

4  
5 (P9)

6 Or:

7  
8 Item walking, step 1: *Well, I walk well. Doesn't apply to me. (P17)*

9  
10  
11 A few participants interpreted the questions as if it was an evaluation of their current level of  
12 functioning. For example:

13  
14 Item energy, step 2: *I: You have filled in 'not at all' in 'you have more energy'. What is the*  
15 *reason that you just ...? P: Because I feel lethargic. That is what I mean to say. I used to be a*  
16 *very energetic person. (...) That is gone. (...) That is what I mean by that question. I: Yes, so*  
17 *you actually filled in how you are feeling now. P: Yes, now. At the time. I: Yes, so you say .. P:*  
18 *Not from last year or half a year ago. They are snapshots, aren't they? That was what you*  
19 *meant, right? (...) I: And when I ask you the question: 'How important is it that you get energy*  
20 *again?' P: Very important. (...) Because I've always been energetic. Very important. (P2)*  
21  
22  
23  
24  
25  
26  
27

28 Other participants had difficulties relating the goals to their own situation. For example:

29  
30 Item *shortness of breath, step 1 I'm actually never short of breath. But it is quite important.*  
31 (P25)

32  
33 There were also participants who did recognize that a certain goal did not apply for them, but they  
34 did not understand how to indicate that in the tool.

35 Some participants were reluctant to use the options 'not at all important' or 'doesn't apply to me',  
36 because they deemed those answers socially undesirable.  
37  
38  
39  
40

41 Since many older persons have multiple health problems, it is possible that a participant experiences  
42 a problem with an item, but is admitted for another health problem. Many participants were able to  
43 make this distinction. For example:  
44  
45

46 Item moving, step 1: *Yes, that will never be all right again, I can tell. Does no longer apply at*  
47 *all. Already 30 years ago they said: Mr. B., you have to learn to live with that. And they still*  
48 *say that today. Osteoarthritis, there is nothing you can do about it. (P18)*  
49  
50

51 But for others this distinction was more difficult.  
52  
53

#### 54 Adaptations

55 To enhance the general understanding, the following adaptations to the tool were made and tested  
56 in new participants:  
57  
58

59 Several adaptations were made in the instruction text.  
60

1  
2  
3 In the columns with the answer options the word 'important' was added to all answer options. For  
4 example: 'very' was changed into 'very important', to make clear that the question was not to  
5 evaluate current function, but to indicate how important the goal was.  
6  
7

8 The sequence of the questions was changed. To enable participants to relate the goals to their own  
9 situation, the questions related to somatic complaints were moved to the beginning of the  
10 questionnaire.  
11  
12

13 Another adaptation made to improve the understanding to relate the goals to the patients' own  
14 situation, was to add the word 'again' to the goals, to make clear that it is something they had before  
15 and they have to regain by the hospital admission. For example: *How important is it to you that you*  
16 *have normal bowel movements again.*  
17  
18

19 The next adaptation was to move the answer option 'doesn't apply to me' from the last to the first  
20 column. This made it easier to find that option.  
21  
22

23 The final adaptation to improve making the connection between the hospital admission and their  
24 goals, was repeating the question in every line. Instead of having the text '*How important is it to you*  
25 *that by this hospital admission...*' on top of the page alone, this question was repeated in every row.  
26  
27

28 Apart from this, several adaptations were made to the layout in order to ease the reading for  
29 participants.  
30  
31

### 32 33 *Understanding and reactions regarding individual items*

34 The following individual items caused discussion: take pleasure in eating, to know the cause of your  
35 complaints, take a short break, and remain alive.  
36  
37

#### 38 39 *Take pleasure in eating*

40 Some participants had a more epicurean association with this item. Therefore, it was changed into:  
41  
42 'regain appetite'.  
43  
44

#### 45 46 *Cause of complaints*

47 With the item 'how important is it for you that you know the cause of your complaints?' some  
48 participants spontaneously started to describe risk factors like smoking. By changing the item into  
49 'knowing what is wrong with you', this was solved.  
50  
51  
52

#### 53 54 *Take a short break*

55 The item 'can take a short break' gave many different interpretations, often without any relationship  
56 with the hospital. Several alternatives were tried: 'to recharge', 'to take a moment', but these did not  
57 improve the understanding. It was therefore decided to remove this item.  
58  
59  
60

### *Remain alive*

The item 'remain alive' gave mixed reactions. Some were irritated by the question. For others it was obvious that it was very important to them that they wanted to remain alive, by adding words like 'of course!'. However, there were also participants who deemed remaining alive less obvious and started to think about the question. Unless the mixed reactions to this question, it was remained because it was not obvious for all participants and because the researchers considered it unreasonable to have a questionnaire with many potential outcomes, but to omit the one outcome that for many participants is considered as the most important.

### *Additions*

Participants gave the following suggestions which were added to the questionnaire: family life, driving, hobbies, urinating. The adaptations and additions led to P-BAS HOP Version 2.

### *General evaluation*

Many participants stated that the questionnaire was quite easy to fill out, although this was not always congruent with the observations about their understanding. Several mentioned enjoying filling in the questionnaire. One participant mentioned that the tool was very important for him in order to state his own priorities. For another participant the questionnaire was considered emotional, because the questions were confronting and he was afraid that many goals were not feasible. For some the questionnaire was somewhat tiring.

### *Content Validity*

The goals the participants mentioned in their own words, were qualified in the questionnaire as at least 'somewhat important' in almost all cases. For example:

*Yes, that is the quality of life .. Yes, it is important that comes up to standard again. (..) Well, cycling that, that comes in second place. I think **walking** is more important than ehm .. (...) I have been a volunteer for more than forty years now, helping people fill out tax forms. I think that is important to me. And that is, that is, that is also the **volunteer work**. If it is somewhat possible I would like to do that again. (...) Ehm, **go on outings**. I would like to keep doing things like that. (P14)*

This participant filled in in the questionnaire: Walking: quite important, (volunteer) work: moderately important, go on outings: moderately important.

TSTI evaluation questionnaire

### *Sample evaluation questionnaire*

Ten patients participated in the TSTI for the evaluation questionnaire at discharge. The sampling of the participants continued until the last version of the questionnaire was considered clear and did not reveal any new problems. Characteristics of the participants are displayed in the third column of Table 1.

### *Process of testing and adaptations*

The process of testing and adapting the evaluation questionnaire was much faster, because many problems with layout and wording of individual items had already been solved in the baseline phase. In the first version, the wording appeared to be too complicated for some participants. Therefore, the original formulation: 'The hospitalisation helped me to....' Was changed into: 'Because of the hospitalisation....'. This adaptation was clear for all the following participants and led to Version 2.

#### **4. Field test with Version 2. Item reduction based on mean impact score and correlation.**

Version 2 was tested with a new group of hospitalised older patients. The aim of this field test was to assess the feasibility of the P-BAS HOP in combination with other questionnaires. The trained research assistants observed during the field test that the tool was too time consuming and that some patients still had difficulties relating the questions to their personal situation, as was observed in the TSTI. Therefore, the following extra adaptations were made: item reduction, answer option reduction, and splitting the tool into two phases.

#### **Participants**

Eligible participants were consecutive patients aged 70 years and older; planned or unplanned hospitalised on medical or surgical wards of a university teaching hospital, expected to stay for at least 48 hours; and at maximal four days hospitalised at the moment of interviewing; able to speak and understand Dutch and were without cognitive impairment. Inclusion criteria were verified with the staff nurse. Patients were approached by a trained research assistant and gave signed informed consent to participate. The questionnaire was then conducted in a face to face interview with the research assistant, but to patients in a better condition and with middle or higher education the opportunity was given to fill in the questionnaire themselves, an option which only a minority of patients choose.

#### **Item reduction**



As this is a formative tool, item reduction procedures suitable for reflective tools, such as based on factor analysis and Cronbach's alpha, are not relevant.<sup>14</sup> Item reduction was therefore based on correlation and mean impact score.

Items within one category with a strong correlation, measured probably the same construct.

Therefore, from dyads with a Spearman's rank-order correlation > 0.7, one item was removed.<sup>14</sup> For the calculation of the Spearman's rank-order correlation coefficient, the answer option 'does not apply to me now' and 'not at all important' were coded as 0, the options somewhat, moderately, quite important and very important were coded respectively as 1, 2, 3, 4.

For the reduction based on mean impact score, all items were sorted into categories. For each item the mean impact score was calculated: [% for whom the item played a role] \* [mean importance for that item]. From every category with two or more items, the item with the lowest mean impact score was removed.<sup>14</sup> The field test was repeated in a regional teaching hospital by a trained research assistant, to check whether the impact differed in another context.

## Results

The Benefit Assessment Scale Version 2 consisted of 32 items. In the three month inclusion period, 492 consecutive eligible patients meeting the inclusion criteria were admitted on the selected wards. Of these patients, 238 were not approached for logistic reasons, for example the patient could not be interviewed within the first four days because of absence for treatment, transfer from ward, shortage of research assistants. Hence, 254 patients were approached for informed consent and 106 patients (42%) gave informed consent. Of the 106 included patients, the P-BAS was not administered 15 times because of lack of time (for example patient had to leave for treatment or discharge) or the patient was too tired. This resulted in 91 administered P-BAS questionnaires. Of the 91 participants, 20 answered the questionnaire independently written and 71 were interviewed by the research assistant. Characteristics of the participants are displayed in Table 2 and the results are shown in Table 3.

Table 2. Participants Field test (n=91)

| Characteristic              | n            |
|-----------------------------|--------------|
| Gender                      |              |
| Male                        | 63           |
| Female                      | 28           |
| Age (years), median (range) | 75 (70 – 96) |
| Native language             |              |

|                           |    |
|---------------------------|----|
| Dutch                     | 55 |
| Local dialect             | 27 |
| Frisian                   | 3  |
| Unknown                   | 6  |
| <b>Educational level*</b> |    |
| Low                       | 22 |
| Middle                    | 47 |
| High                      | 22 |
| <b>Specialty</b>          |    |
| Medical                   | 42 |
| Surgical                  | 23 |
| Cardiology                | 26 |
| <b>Admission type</b>     |    |
| Acute                     | 60 |
| Elective                  | 31 |

\* Definition educational level: Low= no education, primary school, basic vocational training; Middle = secondary education, vocational training; High = bachelor, master

Table 3. Scores of Version 2 Benefit Assessment Scale Baseline. (n=91)

| Item                | Missing          |                | Does not apply to me now<br>n (%) | Importance          |                    |                     |                |               |
|---------------------|------------------|----------------|-----------------------------------|---------------------|--------------------|---------------------|----------------|---------------|
|                     | Failed*<br>n (%) | n.d.†<br>n (%) |                                   | Not at all<br>n (%) | Some-what<br>n (%) | Moderately<br>n (%) | Quite<br>n (%) | Very<br>n (%) |
|                     | Better           | 1 (1.1)        |                                   | 0                   | 8 (8.8)            | 0                   | 1 (1.1)        | 2 (2.2)       |
| Weight              | 1 (1.1)          | 1 (1.1)        | 57 (62.6)                         | 10 (11.0)           | 4 (4.4)            | 7 (7.7)             | 3 (3.3)        | 8 (8.8)       |
| Condition           | 0                | 0              | 17 (18.7)                         | 2 (2.2)             | 1 (1.1)            | 6 (6.6)             | 31 (34.1)      | 34 (37.4)     |
| Energy              | 0                | 1 (1.1)        | 18 (19.8)                         | 1 (1.1)             | 0                  | 3 (3.3)             | 33 (36.3)      | 35 (38.5)     |
| Pain                | 1 (1.1)          | 1 (1.1)        | 33 (36.3)                         | 0                   | 2 (2.2)            | 4 (4.4)             | 9 (9.9)        | 41 (45.1)     |
| Bowel movements     | 0                | 1 (1.1)        | 58 (63.7)                         | 4 (4.4)             | 2 (2.2)            | 1 (1.1)             | 12 (13.2)      | 13 (14.3)     |
| Urinate             | 0                | 1 (1.1)        | 64 (70.3)                         | 4 (4.6)             | 0                  | 1 (1.1)             | 10 (11.0)      | 11 (12.1)     |
| Shortness of breath | 1 (1.1)          | 0              | 39 (42.9)                         | 1 (1.1)             | 2 (2.3)            | 5 (5.5)             | 11 (12.1)      | 32 (35.2)     |
| Walking             | 0                | 1 (1.1)        | 32 (35.2)                         | 1 (1.1)             | 3 (3.3)            | 5 (5.5)             | 16 (17.6)      | 33 (36.3)     |
| Moving              | 0                | 1 (1.1)        | 35 (38.5)                         | 1 (1.1)             | 2 (2.2)            | 5 (5.5)             | 18 (19.8)      | 29 (31.9)     |
| Appetite            | 0                | 2 (2.2)        | 55 (60.4)                         | 1 (1.1)             | 2 (2.2)            | 6 (6.6)             | 9 (9.9)        | 16 (17.6)     |
| Knowing what is     | 0                | 1 (1.1)        | 32 (35.2)                         | 2 (2.2)             | 2 (2.2)            | 1 (1.1)             | 12 (13.2)      | 41 (45.1)     |

|                       |         |         |           |         |         |         |           |           |
|-----------------------|---------|---------|-----------|---------|---------|---------|-----------|-----------|
| wrong                 |         |         |           |         |         |         |           |           |
| Disease under control | 0       | 1 (1.1) | 10 (11.0) | 0       | 0       | 2 (2.2) | 15 (16.5) | 63 (69.2) |
| Alive                 | 0       | 1 (1.1) | 2 (2.2)   | 2 (2.2) | 1 (1.1) | 1 (1.1) | 13 (14.3) | 71 (78.0) |
| Enjoy                 | 0       | 2 (2.2) | 20 (22.0) | 0       | 0       | 2 (2.2) | 13 (14.3) | 54 (59.3) |
| Freedom               | 0       | 1 (1.1) | 31 (34.1) | 0       | 1 (1.1) | 1 (1.1) | 12 (13.2) | 45 (49.5) |
| Cooking               | 0       | 2 (2.3) | 51 (56.0) | 1 (1.1) | 4 (4.4) | 2 (2.2) | 14 (15.4) | 17 (18.7) |
| Housework             | 0       | 1 (1.1) | 51 (56.0) | 2 (2.2) | 5 (5.5) | 5 (5.5) | 10 (11.0) | 17 (18.7) |
| Groceries             | 0       | 1 (1.1) | 42 (46.2) | 1 (1.1) | 5 (5.5) | 9 (9.9) | 12 (13.2) | 21 (23.1) |
| Wash and dress        | 0       | 2 (2.3) | 51 (56.0) | 0       | 0       | 2 (2.2) | 14 (15.4) | 22 (24.2) |
| Garden                | 0       | 1 (1.1) | 48 (52.7) | 2 (2.2) | 1 (1.1) | 8 (8.8) | 10 (11.0) | 21 (23.1) |
| Sports                | 0       | 1 (1.1) | 46 (50.5) | 7 (7.7) | 2 (2.2) | 9 (9.9) | 7 (7.7)   | 19 (20.9) |
| Hobbies               | 0       | 1 (1.1) | 39 (42.9) | 1 (1.1) | 2 (2.2) | 4 (4.4) | 13 (14.3) | 31 (34.1) |
| Work                  | 0       | 3 (3.3) | 63 (69.2) | 3 (3.3) | 0       | 4 (4.4) | 7 (7.7)   | 11 (12.1) |
| Driving               | 0       | 2 (2.2) | 46 (50.2) | 1 (1.1) | 0       | 2 (2.2) | 8 (8.8)   | 32 (35.2) |
| Outings               | 0       | 1 (1.1) | 28 (30.8) | 1 (1.1) | 3 (3.3) | 8 (8.8) | 19 (20.9) | 31 (34.1) |
| Visiting              | 0       | 3 (3.3) | 28 (30.8) | 1 (1.1) | 4 (4.4) | 6 (6.6) | 19 (20.9) | 30 (33.0) |
| Family life           | 0       | 4 (4.4) | 39 (42.9) | 0       | 0       | 2 (2.2) | 12 (13.2) | 34 (37.4) |
| Home                  | 0       | 2 (2.3) | 21 (23.1) | 1 (1.1) | 0       | 1 (1.1) | 4 (4.4)   | 62 (68.1) |
| Independence          | 1 (1.1) | 3 (3.3) | 29 (31.9) | 0       | 1 (1.1) | 2 (2.2) | 6 (6.6)   | 49 (53.8) |

\* Measurement failed: invalid answer due to two options filled in

† n.d. = not done. No answer was given.

As seen in Table 3, the number of missing values ranges from zero to four per item. The answer options with the lowest priorities were used the least, especially 'not at all important' and 'somewhat important'. Therefore, and also because on reflection the options 'somewhat' and 'moderately' were very close, we decided to remove the option 'moderately'.

Four dyads had a Spearman's rank-order correlation coefficient > 0.7: energy and condition ( $r_s = .80$ ); moving and walking ( $r_s = .87$ ); cooking and groceries ( $r_s = .75$ ); cooking and housekeeping ( $r_s = .70$ ). Therefore of these dyads, one item was removed (condition, moving and cooking), inspired by the information derived from the TSTI's.

Table 4 shows the items with mean impact scores, sorted per category and descending mean impact scores. From the categories with at least two items, the item with the lowest mean impact score was removed. To give participants still the opportunity to indicate their individual priorities, even when being a minority, we added an open option to add extra individual goals.

Table 4. Mean impact scores per category.

| Goals | University hospital |            |      | Regional teaching hospital |            |      |
|-------|---------------------|------------|------|----------------------------|------------|------|
|       | Applied             | Importance | Mean | Applied                    | Importance | Mean |

|                                                    | (%) | score (M) | impact score | (%) | score (M) | impact score |
|----------------------------------------------------|-----|-----------|--------------|-----|-----------|--------------|
| <b>Remain alive</b>                                |     |           |              |     |           |              |
| Remain alive                                       | 98  | 3.70      | 3.62         | 75  | 2.64      | 1.90         |
| <b>Controlling disease</b>                         |     |           |              |     |           |              |
| Controlling disease                                | 89  | 3.76      | 3.34         | 29  | 2.43      | 0.70         |
| <b>Improving condition</b>                         |     |           |              |     |           |              |
| Feeling better                                     | 91  | 3.71      | 3.38         | 71  | 2.73      | 1.94         |
| Energy                                             | 80  | 3.40      | 2.72         | 50  | 2.23      | 1.12         |
| <i>Condition</i>                                   | 81  | 3.27      | 2.66         | 65  | 2.34      | 1.53         |
| <i>Weight</i>                                      | 36  | 1.84      | 0.66         | 9   | 2.33      | 0.20         |
| <b>Alleviating complaints</b>                      |     |           |              |     |           |              |
| Pain                                               | 63  | 3.59      | 2.26         | 44  | 2.72      | 1.20         |
| Breath                                             | 57  | 3.39      | 1.92         | 38  | 2.64      | 0.99         |
| Appetite                                           | 38  | 3.09      | 1.18         | 35  | 2.39      | 0.83         |
| Bowel                                              | 35  | 2.88      | 1.03         | 29  | 2.47      | 0.71         |
| <i>Urinate</i>                                     | 29  | 2.92      | 0.83         | 17  | 2.67      | 0.46         |
| <b>Enjoying life</b>                               |     |           |              |     |           |              |
| Enjoying life                                      | 78  | 3.75      | 2.91         | 31  | 2.53      | 0.78         |
| <b>Improving/maintaining social functioning</b>    |     |           |              |     |           |              |
| Outing                                             | 69  | 3.23      | 2.23         | 27  | 2.11      | 0.57         |
| Visiting                                           | 68  | 3.22      | 2.20         | 21  | 1.91      | 0.40         |
| <i>Family life</i>                                 | 55  | 3.67      | 2.03         | 5   | 2.80      | 0.13         |
| <b>Knowing what is wrong</b>                       |     |           |              |     |           |              |
| Wrong                                              | 64  | 3.52      | 2.27         | 39  | 2.58      | 0.99         |
| <b>Regaining/maintaining independence, freedom</b> |     |           |              |     |           |              |
| Home                                               | 76  | 3.85      | 2.94         | 15  | 2.50      | 0.39         |
| Independence                                       | 67  | 3.78      | 2.52         | 17  | 2.44      | 0.42         |
| <i>Freedom</i>                                     | 66  | 3.71      | 2.43         | 23  | 2.54      | 0.59         |
| <b>Improving daily functioning</b>                 |     |           |              |     |           |              |
| Walking                                            | 64  | 3.33      | 2.14         | 54  | 2.57      | 1.38         |
| <i>Moving</i>                                      | 61  | 3.31      | 2.02         | 34  | 2.54      | 0.86         |
| Driving                                            | 48  | 3.63      | 1.75         | 14  | 2.13      | 0.31         |
| Groceries                                          | 53  | 2.98      | 1.59         | 19  | 2.30      | 0.44         |
| Wash/dress                                         | 43  | 3.53      | 1.52         | 26  | 2.52      | 0.65         |
| <i>Cooking</i>                                     | 43  | 3.11      | 1.33         | 15  | 1.75      | 0.27         |
| <i>Housework</i>                                   | 43  | 2.90      | 1.26         | 20  | 1.86      | 0.38         |
| <b>Resuming work/hobbies</b>                       |     |           |              |     |           |              |
| Hobbies                                            | 57  | 3.39      | 1.92         | 20  | 2.00      | 0.40         |
| Garden                                             | 47  | 3.12      | 1.46         | 16  | 1.24      | 0.20         |
| Sports                                             | 49  | 2.66      | 1.30         | 23  | 1.58      | 0.37         |
| <i>Work</i>                                        | 28  | 2.92      | 0.83         | 13  | 1.92      | 0.24         |

The removed items are indicated in italic.

#### Repetition field test in regional teaching hospital

The field test was repeated in a regional teaching hospital with the same items, but with fewer answer options and the questions in two steps, as explained in the next paragraph. In the eight week inclusion period, 209 patients meeting the inclusion criteria were admitted on the wards. Of these patients, 56 were not approached for logistic reasons. 153 Were therefore approached for informed consent and 104 patients (67%) gave informed consent. The items with the lowest mean impact scores were the same for most categories, except for the categories independence/freedom, improving daily functioning and work/hobbies.

#### Splitting tool into two phases

Since some problems with understanding remained, especially the difficulties relating the goals to their own situation, as described in the TSTI, we decided to split the tool into two phases. In the first phase an inventory of subjects with problems or limitations was made. These could be problems/limitations at the moment of interview, at admission, or expected problems/limitations. In the second phase, only the importance was asked for the goals related to the subjects that applied. As this adaptation complicated the tool, we decided to use it as an interview-based tool. The item reduction and splitting into two phases, resulted in P-BAS HOP version 3.

### 5. TSTI with Version 3.

Version 3 was tested again with the TSTI in hospitalised older patients. The procedure was identical as in step 3, however as this version is only applicable as an interview version, this was done with an interviewer and observant. The observant only observed during the first step, and took over the interview role in the second and third steps.

#### Results

Eight participants participated in the TSTI about Version 3. Characteristics of the participants are displayed in the last column of Table 1.

#### General understanding

In general, the tool in two phases was well-understood. For example:

Item *shortness of breath*, phase 1, step 1: *No, I have no problems with that, you know, shortness of breath. (A1)*

Or:

1  
2  
3 Item *shortness of breath*, phase 1, step 1: *Yes, that is present! And for that reason, I am*  
4 *admitted here. My oxygen was too low. And my carbon dioxide level is not good, much too*  
5 *high. Yes, complication of, yes. (A3)*  
6  
7

8 We shortened the instructions, but did not modify the content of the tool. This last adaptation led to  
9 the final questionnaire (Appendix 2). The completion of this baseline questionnaire took 5 to 24  
10 minutes, with a median of 11 minutes.  
11  
12  
13

## 14 15 16 **DISCUSSION**

17 The Patient Benefit Assessment Scale for Hospitalised Older patients (P-BAS HOP) was constructed as  
18 a tool that should be capable both to identify the goals and priorities of the individual older  
19 hospitalised patient and to measure the outcomes relevant to him regarding hospitalisation.  
20

21 The items of the P-BAS HOP were based on interviews with hospitalised older patients. Including  
22 patients in the generation of patient reported outcomes is not self-evident and is even absent in  
23 many cases.<sup>18</sup> But even when patients are involved in the generation of outcomes, they still only  
24 reflect the priorities of the overall patient population and not the individual patient. Therefore, the  
25 major advantage of the P-BAS HOP is that patients can indicate their individual priorities, which also  
26 leads to individual benefit-scores.  
27  
28

29 Indicating individual priorities is also possible with the GAS, but the GAS is more time consuming,  
30 varying from 15-20 minutes for experienced assessors,<sup>19</sup> to 90 minutes per patient,<sup>20</sup> while the P-BAS  
31 HOP takes 5 to 24 minutes, with a median of 11 minutes. Moreover, for some older patients it might  
32 be difficult to formulate their own goals,<sup>12</sup> and the P-BAS HOP helps patients with examples of  
33 predefined goals.  
34  
35

36 More recently, models for goal based decision making were developed,<sup>21-23</sup> but these method are  
37 more suitable for clinical encounters to align treatment option with patient goals. The major  
38 advantage of the P-BAS HOP is that it is a more suitable and efficient tool to measure personalised  
39 outcomes in, for example, trials. It also could replace a diversity of existing tools, since it covers  
40 several dimension like symptoms, daily functioning, social functioning.  
41  
42

43 The pilot and field tests of the P-BAS HOP started already before we achieved complete saturation of  
44 goals in the qualitative interviews. Therefore, patients had the possibility to add goals during the  
45 TSTI. Several goals were added during the TSTI, which also appeared later in the qualitative  
46 interviews.<sup>3</sup> Still, the qualitative interviews revealed later some extra target complaints, which were  
47 not included in the P-BAS HOP, such as vomiting, dizziness and sweating. Yet, in the final version of  
48 the P-BAS HOP, patients still have the opportunity to add personal goals which were not mentioned  
49 before.  
50  
51  
52  
53  
54  
55  
56  
57  
58  
59  
60

1  
2  
3 By using the mean impact score to reduce items, items considered least important by the overall  
4 sample were removed, though this does not take account of the priorities of individuals who deviate  
5 from the majority. For this reason the extra open option was added. Most removed items, based on  
6 mean impact score, were confirmed when repeated in the regional teaching hospital. The only  
7 exceptions were in the categories *improving daily functioning, resuming work/hobbies, and*  
8 *regaining/maintaining independence/freedom.*

9  
10 In the categories improving daily functioning and resuming work/hobbies, the lowest priorities were  
11 'housework' and 'work' in the first sample and 'driving' and 'gardening' in the second. Since driving  
12 and work were the second lowest priority in the second sample, the removal of housework and work  
13 could be justified.

14  
15 In the category *regaining/maintaining independence/freedom* priorities in both hospitals were  
16 entirely opposite. We therefore have to conclude that we were too early to remove the item  
17 freedom. It is unclear whether these differences are caused by different contexts or because the field  
18 test in the regional hospital was after splitting the questionnaire into two phases and therefore the  
19 questions were altered.

### 20 21 22 23 24 25 26 27 28 **Limitations**

29  
30 The P-BAS HOP is only tested in hospitalised patients without cognitive impairment. It is therefore  
31 unknown if it is suitable in other contexts and it might be too complex for patients with cognitive  
32 impairment. In addition, the P-BAS HOP is only tested in the Netherlands and the translated English  
33 version has not yet been tested. Therefore, it is unknown whether the P-BAS HOP is applicable in  
34 other languages and cultures.

35  
36 The TSTI gave valuable insights into the understanding of the questionnaire and the completion  
37 behaviour of the participants. Many adaptations were made, but it proved difficult to make the  
38 questionnaire understandable for all patients. These kinds of difficulties were seen in various  
39 examples where the TSTI was used.<sup>16, 24-26</sup> Unfortunately, the final version is only suitable to be  
40 completed with an interviewer and not as a self-administered questionnaire. The TSTI gave a first  
41 indication of the content validity, but further quantitative research into the construct validity,  
42 reliability and responsivity is needed.

### 43 44 45 46 47 48 49 50 51 **Conclusions**

52  
53 The Patient Benefit Assessment Scale for Hospitalised Older Patients (P-BAS HOP) is a potentially  
54 suitable interview-based tool to identify the priorities and relevant outcomes of the individual older  
55 hospitalised adult. Based on these data it is possible to compute an individual Patient Benefit Index,  
56 which is an overall value between 0 (no benefit) and 3 (maximal benefit), which reflects the  
57  
58  
59  
60

1  
2  
3 achievement of the goals weighted by the importance. Further quantitative research is needed to  
4 investigate the construct validity, reliability and responsiveness.  
5  
6  
7

8 **Acknowledgements** We would like to thank all patients who participated in the interviews for  
9 sharing their stories with us and their feedback on the different versions of the P-BAS HOP. We thank  
10 the panel members for their feedback on the draft version. We would also like to thank all the  
11 research assistants and students for the many interviews they conducted, especially Gerdine Boot for  
12 all the patients she interviewed in the regional teaching hospital. We would like to thank Daniël  
13 Bosold, Janet Vroomen, Caroline Mutsaers, Margaretha Schenkeveld and Anna Pot for their role in  
14 the translation process of the P-BAS HOP.  
15  
16  
17  
18

19 **Funding** This study was funded by an unrestricted grant from the Dutch Foundation for Effective  
20 Elderly Care and the University of Groningen.  
21  
22

23 **Author's contribution** MJvdK designed the study. MJvdK conducted the Three Step Test Interviews  
24 (TSTI's). MJvdK coded the data of the TSTI's. MJvdK and SEdR regularly discussed the codes and the  
25 progress and adaptations of the different versions of the P-BAS HOP. SEdR supervised the field test in  
26 the University hospital, BCvM in the Regional teaching hospital. MJvdK wrote the first draft of the  
27 manuscript, GJD, BCvM and SEdR contributed significantly to subsequent manuscript revisions. All  
28 authors have read and approved the final version of the manuscript.  
29  
30  
31  
32

33 **Competing interests** None declared  
34

35 **Data sharing** All data relevant to the study are included in the article  
36

37 **Patient consent** All patients gave informed consent  
38

#### 39 **Ethical approval**

40 The Medical Ethics Research Committee of the UMCG (file number M16.192615 and M16.199647)  
41 confirmed that the Medical Research Involving Human Subjects Act did not apply to the research  
42 project. Official approval by the committee was therefore not required.  
43  
44  
45  
46

#### 47 **REFERENCES**

48  
49 1 Reuben DB, Tinetti ME. Goal-oriented patient care--an alternative health outcomes paradigm. *N*  
50 *Engl J Med* 2012;366:777-9 doi:10.1056/NEJMp1113631.  
51

52  
53 2 Tinetti ME, Naik AD, Dodson JA. Moving from disease-centered to patient goals-directed care for  
54 patients with multiple chronic conditions: Patient value-based care. *JAMA Cardiology* 2016;1:9-10  
55 doi:10.1001/jamacardio.2015.0248.  
56

57 3 Van der Kluit MJ, Dijkstra GJ, de Rooij S,E. Goals of older hospitalised patients: a qualitative  
58 descriptive study. *BMJ open* 2019;9:e029993- doi:10.1136/bmjopen-2019-029993.  
59  
60



- 1  
2  
3 4 Vermunt NP, Harmsen M, Elwyn G, et al. A three-goal model for patients with multimorbidity: A  
4 qualitative approach. *Health Expect* 2018;21:528-38 doi:10.1111/hex.12647 [doi].  
5  
6  
7 5 Donnelly C, Carswell A. Individualized outcome measures: a review of the literature. *Can J Occup*  
8 *Ther* 2002;69:84-94.  
9  
10 6 Mangin D, Stephen G, Bismah V, et al. Making patient values visible in healthcare: a systematic  
11 review of tools to assess patient treatment priorities and preferences in the context of  
12 multimorbidity. *BMJ Open* 2016;6:e010903- doi:10.1136/bmjopen-2015-010903.  
13  
14 7 van Seben R, Reichardt L, Smorenburg S, et al. Goal-Setting Instruments in Geriatric Rehabilitation:  
15 A Systematic Review. *J Frailty Aging* 2017;6:37-45 doi:10.14283/jfa.2016.103.  
16  
17 8 Fried TR, Tinetti M, Agostini J, et al. Health outcome prioritization to elicit preferences of older  
18 persons with multiple health conditions. *Patient Educ Couns* 2011;83:278-82  
19 doi:10.1016/j.pec.2010.04.032.  
20  
21 9 Stolee P, Awad M, Byrne K, et al. A multi-site study of the feasibility and clinical utility of Goal  
22 Attainment Scaling in geriatric day hospitals. *Disabil Rehabil* 2012;34:1716-26  
23 doi:10.3109/09638288.2012.660600 [doi].  
24  
25 10 Battle CC, Imber SD, Hoehn-Saric R, et al. Target complaints as criteria of improvement. *Am J*  
26 *Psychother* 1966;20:184-92 doi:10.1176/appi.psychotherapy.1966.20.1.184 [doi].  
27  
28 11 Hesbacher PT, Rickels K, Weise C. Target symptoms: a promising improvement criterion in  
29 psychiatric drug research. *Arch Gen Psychiatry* 1968;18:595-600.  
30  
31 12 Schulman-Green DJ, Naik AD, Bradley EH, et al. Goal setting as a shared decision making strategy  
32 among clinicians and their older patients. *Patient Educ Couns* 2006;63:145-51 doi:S0738-  
33 3991(05)00275-2 [pii].  
34  
35 13 Augustin M, Reich C, Schaefer I, et al. Development and validation of a new instrument for the  
36 assessment of patient-defined benefit in the treatment of acne. *J Dtsch Dermatol Ges* 2008;6:113-20  
37 doi:10.1111/j.1610-0387.2007.06540.x.  
38  
39 14 De Vet HCW, Terwee CB, Mokkink LB, et al. Measurement in Medicine. A Practical Guide.  
40 Cambridge: Cambridge University Press 2011.  
41  
42 15 Beaton DE, Bombardier C, Guillemin F, et al. Guidelines for the Process of Cross-Cultural  
43 Adaptation of Self-Report Measures. *Spine* 2000;25:3186-91 doi:10.1097/00007632-200012150-  
44 00014.  
45  
46 16 Pool JJM, Hiralal S, Ostelo, Raymond W J G, et al. Added value of qualitative studies in the  
47 development of health related patient reported outcomes such as the Pain Coping and Cognition List  
48 in patients with sub-acute neck pain. *Man Ther* 2010;15:43-7 doi:10.1016/j.math.2009.05.010.  
49  
50 17 Van Der Veer K, Ommundsen R, Hak T, et al. Meaning Shift of Items in Different Language  
51 Versions. A Cross-National Validation Study of the Illegal Aliens Scale. *Quality and Quantity*  
52 2003;37:193-206.  
53  
54  
55  
56  
57  
58  
59  
60

1  
2  
3 18 Wiering B, de Boer D, Delnoij D. Patient involvement in the development of patient-reported  
4 outcome measures: a scoping review. *Health Expect* 2017;20:11-23 doi:10.1111/hex.12442 [doi].  
5

6 19 Stolee P, Rockwood K, Fox RA, et al. The use of goal attainment scaling in a geriatric care setting. *J*  
7 *Am Geriatr Soc* 1992;40:574-8.  
8

9  
10 20 Toto PE, Skidmore ER, Terhorst L, et al. Goal Attainment Scaling (GAS) in geriatric primary care: a  
11 feasibility study. *Arch Gerontol Geriatr* 2015;60:16-21 doi:10.1016/j.archger.2014.10.022 [doi].  
12

13 21 Elwyn G, Vermunt NPCA. Goal-Based Shared Decision-Making: Developing an Integrated Model.  
14 *Journal of Patient Experience* 2019:1-9 doi:10.1177/2374373519878604.  
15

16 22 Naik AD, Dindo LN, Van Liew JR, et al. Development of a Clinically Feasible Process for Identifying  
17 Individual Health Priorities. *J Am Geriatr Soc* 2018;66:1872-9 doi:10.1111/jgs.15437 [doi].  
18

19 23 Tinetti ME, Naik AD, Dindo L, et al. Association of Patient Priorities-Aligned Decision-Making With  
20 Patient Outcomes and Ambulatory Health Care Burden Among Older Adults With Multiple Chronic  
21 Conditions: A Nonrandomized Clinical Trial. *JAMA Intern Med* 2019;179:1688-97  
22 doi:10.1001/jamainternmed.2019.4235 [doi].  
23

24 24 Jansen H, Hak T. The Productivity of the Three-step Test-interview (TSTI) Compared to an Expert  
25 Review of a Self-administered Questionnaire on Alcohol Consumption. *Journal of official statistics*  
26 2005;21:103-20.  
27

28 29  
30 25 Liu RD, Buffart LM, Kersten MJ, et al. Psychometric properties of two physical activity  
31 questionnaires, the AQuAA and the PASE, in cancer patients. *BMC Med Res Methodol*  
32 2011;11:30,2288-11-30 doi:10.1186/1471-2288-11-30 [doi].  
33

34 26 van Alphen A, Westerman MJ, Visschedijk JH, et al. A qualitative study of Falls Efficacy Scale-  
35 International/Hips. What do we measure?. *Tijdschr Gerontol Geriatr* 2013;44:3-11  
36 doi:10.1007/s12439-013-0005-9 [doi].  
37  
38  
39  
40  
41  
42  
43  
44  
45  
46  
47  
48  
49  
50  
51  
52  
53  
54  
55  
56  
57  
58  
59  
60



## Appendix 1. Version 1. Patient Benefit Assessment Scale

### Hospitalisation goals

The following questions cover how important the goals below are for you during your current hospitalisation.

Can you indicate how important each goal below is for you? You can choose from: 'not at all', 'somewhat', 'moderately', 'quite', or 'very'. If a goal doesn't apply to you, for example because you don't have difficulty with the listed problem (for example with bowel movements, or shortness of breath) or because you don't have a garden, then choose 'does not apply to me'.

|    | How important is it for you that through this hospitalisation... | Not at all | Somewhat | Moderately | Quite | Very | Does not apply to me |
|----|------------------------------------------------------------------|------------|----------|------------|-------|------|----------------------|
| 1  | You feel better                                                  |            |          |            |       |      |                      |
| 2  | You regain weight                                                |            |          |            |       |      |                      |
| 3  | Your condition improves                                          |            |          |            |       |      |                      |
| 4  | You have more energy                                             |            |          |            |       |      |                      |
| 5  | You can walk better                                              |            |          |            |       |      |                      |
| 6  | You move easier                                                  |            |          |            |       |      |                      |
| 7  | You can do housework                                             |            |          |            |       |      |                      |
| 8  | You can cook                                                     |            |          |            |       |      |                      |
| 9  | You can do the groceries                                         |            |          |            |       |      |                      |
| 10 | You can garden                                                   |            |          |            |       |      |                      |
| 11 | You can take pleasure in eating                                  |            |          |            |       |      |                      |
| 12 | You can wash and dress yourself                                  |            |          |            |       |      |                      |
| 13 | You can exercise or participate in sports                        |            |          |            |       |      |                      |
| 14 | You have no pain                                                 |            |          |            |       |      |                      |
| 15 | You have normal bowel movements                                  |            |          |            |       |      |                      |
| 16 | You have less shortness of breath                                |            |          |            |       |      |                      |
| 17 | Your disease is under control                                    |            |          |            |       |      |                      |
| 18 | You remain alive                                                 |            |          |            |       |      |                      |
| 19 | You can enjoy life                                               |            |          |            |       |      |                      |
| 20 | You regain your freedom                                          |            |          |            |       |      |                      |
| 21 | You can resume your (volunteer) work                             |            |          |            |       |      |                      |
| 22 | You can go on outings                                            |            |          |            |       |      |                      |
| 23 | You can visit friends or family                                  |            |          |            |       |      |                      |
| 24 | You can take a short break                                       |            |          |            |       |      |                      |
| 25 | You know the cause of your complaints                            |            |          |            |       |      |                      |
| 26 | You can go back home                                             |            |          |            |       |      |                      |
| 27 | You regain your independence                                     |            |          |            |       |      |                      |

### Evaluation of hospitalisation goals

In the beginning of your hospitalisation you indicated how important various goals for you were. Can you indicate for each of the goals below how much the hospitalisation has helped to achieving the goal? You can indicate whether the hospitalisation helped you 'not at all', 'somewhat', 'moderately' 'quite', or 'very'. If a goal didn't apply to you, for example because you didn't have difficulty with the listed problem (for example with bowel movements, or shortness of breath) or because you have no garden, then choose 'did not apply to me'.

|    | The hospitalisation helped me to...         | Not at all | Somewhat | Moderately | Quite | Very | Did not apply to me |
|----|---------------------------------------------|------------|----------|------------|-------|------|---------------------|
| 1  | Feel better                                 |            |          |            |       |      |                     |
| 2  | Regain weight                               |            |          |            |       |      |                     |
| 3  | Improve my condition                        |            |          |            |       |      |                     |
| 4  | Have more energy                            |            |          |            |       |      |                     |
| 5  | Walk better                                 |            |          |            |       |      |                     |
| 6  | Move easier                                 |            |          |            |       |      |                     |
| 7  | Do the housework                            |            |          |            |       |      |                     |
| 8  | Cook                                        |            |          |            |       |      |                     |
| 9  | Do the groceries                            |            |          |            |       |      |                     |
| 10 | Garden                                      |            |          |            |       |      |                     |
| 11 | Take pleasure in eating                     |            |          |            |       |      |                     |
| 12 | Wash and dress myself                       |            |          |            |       |      |                     |
| 13 | Exercise or Participate in sports           |            |          |            |       |      |                     |
| 14 | Have no pain                                |            |          |            |       |      |                     |
| 15 | Have normal bowel movements                 |            |          |            |       |      |                     |
| 16 | Have less shortness of breath               |            |          |            |       |      |                     |
| 17 | Keep my disease under control               |            |          |            |       |      |                     |
| 18 | Remain alive                                |            |          |            |       |      |                     |
| 19 | Enjoy life                                  |            |          |            |       |      |                     |
| 20 | Regain my freedom                           |            |          |            |       |      |                     |
| 21 | Resume my volunteer work                    |            |          |            |       |      |                     |
| 22 | Go on outings                               |            |          |            |       |      |                     |
| 23 | Visit family or friends                     |            |          |            |       |      |                     |
| 24 | Can take a short break                      |            |          |            |       |      |                     |
| 25 | Know what the cause of my complaints is/was |            |          |            |       |      |                     |
| 26 | Go back to my home                          |            |          |            |       |      |                     |
| 27 | Regain my independence                      |            |          |            |       |      |                     |

## Appendix 2. Final Version Patient Benefit Assessment Scale

### Hospitalisation Goals

People differ in what they wish to achieve with a hospitalisation. They have different goals. This depends on what they suffer from, what they are hospitalised for, and what they find important in life.

I am now going to mention some subjects that may be important to you during this hospitalisation. Can you say whether each applies to you?

A subject applies to you if you experience or anticipate problems or limitations and this applies to your life. For people who, for example, are short of breath, the subject shortness of breath probably applies, but not for others. For others they may be struggling to enjoy life because of their illness, but if you experience no problems with it, then this doesn't apply to you.

*Instruction for the interviewer: Circle the number for the subject that applies to the participant.*

*If a participant asks what you mean by a subject, say:*

*Are you experiencing problems with [subject] now, or when you were admitted, or are you expecting problems with it because of your illness or hospitalisation?*

*For the functional subjects, prefer not to use the word 'problem', but rather 'trouble' or 'limitation'.*

Now follow the subjects, you should indicate whether each subject applies to you or not:

1. Wanting to feel better

*Explanation if necessary: do you feel sick or miserable and would you like to feel better?*

2. Energy

3. Pain

4. Bowel movements

5. Shortness of breath

6. Walking

7. Appetite

8. Uncertainty about what is wrong with me

*Explanation if necessary: you may be wondering what is wrong with you. If this was already clear for you when you were admitted then this does not apply.*

9. Controlling my disease

*Explanation if necessary: Do you suffer from a disease that needs to be controlled?*

10. Remain alive

*Explanation if necessary: Was your life in danger when you were admitted or do you think that this hospitalisation must contribute to remain alive?*

11. Enjoying life

12. Housework

13. Groceries

14. Washing and dressing myself

15. Gardening

16. Exercise or Sports

17. Hobbies

18. Driving

19. Going on outings

20. Visiting family or friends

1  
2  
3 21. Return back to my home

4 *Explanation if necessary: Are you unsure whether you can return to your own home?*

5  
6 22. Independence

7 23. Are there other themes which are important to you during this hospitalisation that I have not  
8 mentioned yet? If so, which?  
9

10  
11 Now that we have identified the themes that apply to you, I am going to ask to what extent they are  
12 goals during this hospitalisation.  
13

14  
15 Can you indicate for each goal that I mention how important it is during this hospitalisation? You can  
16 choose from 'not at all important', 'moderately important' 'quite important', or 'very important'.  
17

18  
19 For some goals you may still say that they do not apply, for example because they do not matter  
20 during this hospitalisation. Then you indicate "does not apply to me now".  
21

22  
23 *Instruction to interviewer: Read only the goals which you have circled.*  
24  
25  
26  
27  
28  
29  
30  
31  
32  
33  
34  
35  
36  
37  
38  
39  
40  
41  
42  
43  
44  
45  
46  
47  
48  
49  
50  
51  
52  
53  
54  
55  
56  
57  
58  
59  
60

|    |                                                                                                                   | does<br>not apply<br>to me now | not at all<br>important  | somewhat<br>important    | quite<br>important       | very<br>important        |
|----|-------------------------------------------------------------------------------------------------------------------|--------------------------------|--------------------------|--------------------------|--------------------------|--------------------------|
| 1  | How important is it for you that you <b>feel better again</b> as a result of this hospitalisation                 | <input type="checkbox"/>       | <input type="checkbox"/> | <input type="checkbox"/> | <input type="checkbox"/> | <input type="checkbox"/> |
| 2  | How important is it for you that you <b>have more energy</b> as a result of this hospitalisation                  | <input type="checkbox"/>       | <input type="checkbox"/> | <input type="checkbox"/> | <input type="checkbox"/> | <input type="checkbox"/> |
| 3  | How important is it for you that you <b>have less pain</b> as a result of this hospitalisation                    | <input type="checkbox"/>       | <input type="checkbox"/> | <input type="checkbox"/> | <input type="checkbox"/> | <input type="checkbox"/> |
| 4  | How important is it for you that you <b>have normal bowel movements again</b> as a result of this hospitalisation | <input type="checkbox"/>       | <input type="checkbox"/> | <input type="checkbox"/> | <input type="checkbox"/> | <input type="checkbox"/> |
| 5  | How important is it for you that you <b>are less short of breath</b> as a result of this hospitalisation          | <input type="checkbox"/>       | <input type="checkbox"/> | <input type="checkbox"/> | <input type="checkbox"/> | <input type="checkbox"/> |
| 6  | How important is it for you that you can <b>walk better again</b> as a result of this hospitalisation             | <input type="checkbox"/>       | <input type="checkbox"/> | <input type="checkbox"/> | <input type="checkbox"/> | <input type="checkbox"/> |
| 7  | How important is it for you that you <b>regain your appetite</b> as a result of this hospitalisation              | <input type="checkbox"/>       | <input type="checkbox"/> | <input type="checkbox"/> | <input type="checkbox"/> | <input type="checkbox"/> |
| 8  | How important is it for you that you <b>know what is wrong with you</b> as a result of this hospitalisation       | <input type="checkbox"/>       | <input type="checkbox"/> | <input type="checkbox"/> | <input type="checkbox"/> | <input type="checkbox"/> |
| 9  | How important is it for you that <b>your disease is under control</b> as a result of this hospitalisation         | <input type="checkbox"/>       | <input type="checkbox"/> | <input type="checkbox"/> | <input type="checkbox"/> | <input type="checkbox"/> |
| 10 | How important is it for you that you <b>remain alive</b> as a result of this hospitalisation                      | <input type="checkbox"/>       | <input type="checkbox"/> | <input type="checkbox"/> | <input type="checkbox"/> | <input type="checkbox"/> |
| 11 | How important is it for you that you can <b>enjoy life again</b> as a result of this hospitalisation              | <input type="checkbox"/>       | <input type="checkbox"/> | <input type="checkbox"/> | <input type="checkbox"/> | <input type="checkbox"/> |
| 12 | How important is it for you that you can <b>do housework again</b> as a result of this hospitalisation            | <input type="checkbox"/>       | <input type="checkbox"/> | <input type="checkbox"/> | <input type="checkbox"/> | <input type="checkbox"/> |



|    |                                                                                                                                 | does<br>not apply<br>to me now | not at all<br>important  | somewhat<br>important    | quite<br>important       | very<br>important        |
|----|---------------------------------------------------------------------------------------------------------------------------------|--------------------------------|--------------------------|--------------------------|--------------------------|--------------------------|
| 13 | How important is it for you that you can <b>do the groceries again</b> as a result of this hospitalisation                      | <input type="checkbox"/>       | <input type="checkbox"/> | <input type="checkbox"/> | <input type="checkbox"/> | <input type="checkbox"/> |
| 14 | How important is it for you that you <b>can wash and dress yourself again</b> as a result of this hospitalisation               | <input type="checkbox"/>       | <input type="checkbox"/> | <input type="checkbox"/> | <input type="checkbox"/> | <input type="checkbox"/> |
| 15 | How important is it for you that you <b>can garden again</b> as a result of this hospitalisation                                | <input type="checkbox"/>       | <input type="checkbox"/> | <input type="checkbox"/> | <input type="checkbox"/> | <input type="checkbox"/> |
| 16 | How important is it for you that you <b>can exercise or participate in sports again</b> as a result of this hospitalisation     | <input type="checkbox"/>       | <input type="checkbox"/> | <input type="checkbox"/> | <input type="checkbox"/> | <input type="checkbox"/> |
| 17 | How important is it for you that you <b>can exercise your hobbies again</b> as a result of this hospitalisation                 | <input type="checkbox"/>       | <input type="checkbox"/> | <input type="checkbox"/> | <input type="checkbox"/> | <input type="checkbox"/> |
| 18 | How important is it for you that you <b>can drive again</b> as a result of this hospitalisation                                 | <input type="checkbox"/>       | <input type="checkbox"/> | <input type="checkbox"/> | <input type="checkbox"/> | <input type="checkbox"/> |
| 19 | How important is it for you that you <b>go on outings again</b> as a result of this hospitalisation                             | <input type="checkbox"/>       | <input type="checkbox"/> | <input type="checkbox"/> | <input type="checkbox"/> | <input type="checkbox"/> |
| 20 | How important is it for you that you <b>can visit family or friends again</b> as a result of this hospitalisation               | <input type="checkbox"/>       | <input type="checkbox"/> | <input type="checkbox"/> | <input type="checkbox"/> | <input type="checkbox"/> |
| 21 | How important is it for you that you <b>can return to your own home again</b> as a result of this hospitalisation               | <input type="checkbox"/>       | <input type="checkbox"/> | <input type="checkbox"/> | <input type="checkbox"/> | <input type="checkbox"/> |
| 22 | How important is it for you that you <b>regain your independence</b> as a result of this hospitalisation                        | <input type="checkbox"/>       | <input type="checkbox"/> | <input type="checkbox"/> | <input type="checkbox"/> | <input type="checkbox"/> |
| 23 | How important is it for you that you _____ as a result of this hospitalisation                                                  | <input type="checkbox"/>       | <input type="checkbox"/> | <input type="checkbox"/> | <input type="checkbox"/> | <input type="checkbox"/> |
| 24 | Do you have any goals I haven't mentioned yet? If so: How important is it to you that _____ as a result of this hospitalisation | <input type="checkbox"/>       | <input type="checkbox"/> | <input type="checkbox"/> | <input type="checkbox"/> | <input type="checkbox"/> |

1  
2  
3  
4  
5  
6  
7  
8  
9  
10  
11  
12  
13  
14  
15  
16  
17  
18  
19  
20  
21  
22  
23  
24  
25  
26  
27  
28  
29  
30  
31  
32  
33  
34  
35  
36  
37  
38  
39  
40  
41  
42  
43  
44  
45  
46

**Evaluation of hospitalisation goals**

In the beginning of your hospitalisation you indicated how important various goals for you were. A goal is something you want to achieve with a hospitalisation. Some goals you may have achieved, others maybe not or not entirely.

Can you indicate for each of the goals below how much the hospitalisation has helped to achieving the goal? You can indicate whether the hospitalisation has helped you 'not at all', 'moderately', 'quite', or 'completely'.

*Only the goals which applied at baseline are evaluated with the participant.*

|    |                                                                           | <b>Not at all</b>        | <b>Somewhat</b>          | <b>Quite</b>             | <b>Completely</b>        |
|----|---------------------------------------------------------------------------|--------------------------|--------------------------|--------------------------|--------------------------|
| 1  | Because of the hospitalisation I <b>feel better again</b>                 | <input type="checkbox"/> | <input type="checkbox"/> | <input type="checkbox"/> | <input type="checkbox"/> |
| 2  | Because of the hospitalisation I have <b>more energy</b>                  | <input type="checkbox"/> | <input type="checkbox"/> | <input type="checkbox"/> | <input type="checkbox"/> |
| 3  | Because of the hospitalisation I have <b>no more pain</b>                 | <input type="checkbox"/> | <input type="checkbox"/> | <input type="checkbox"/> | <input type="checkbox"/> |
| 4  | Because of the hospitalisation I have <b>normal bowel movements again</b> | <input type="checkbox"/> | <input type="checkbox"/> | <input type="checkbox"/> | <input type="checkbox"/> |
| 5  | Because of the hospitalisation I am <b>less short of breath</b>           | <input type="checkbox"/> | <input type="checkbox"/> | <input type="checkbox"/> | <input type="checkbox"/> |
| 6  | Because of the hospitalisation I <b>walk better again</b>                 | <input type="checkbox"/> | <input type="checkbox"/> | <input type="checkbox"/> | <input type="checkbox"/> |
| 7  | Because of the hospitalisation I <b>regained appetite</b>                 | <input type="checkbox"/> | <input type="checkbox"/> | <input type="checkbox"/> | <input type="checkbox"/> |
| 8  | Because of the hospitalisation I <b>know what is/ was wrong with me</b>   | <input type="checkbox"/> | <input type="checkbox"/> | <input type="checkbox"/> | <input type="checkbox"/> |
| 9  | Because of the hospitalisation <b>my disease is under control</b>         | <input type="checkbox"/> | <input type="checkbox"/> | <input type="checkbox"/> | <input type="checkbox"/> |
| 10 | Because of the hospitalisation I <b>remained alive</b>                    | <input type="checkbox"/> | <input type="checkbox"/> | <input type="checkbox"/> | <input type="checkbox"/> |
| 11 | Because of the hospitalisation I <b>enjoy life again</b>                  | <input type="checkbox"/> | <input type="checkbox"/> | <input type="checkbox"/> | <input type="checkbox"/> |
| 12 | Because of the hospitalisation I <b>do my housework again</b>             | <input type="checkbox"/> | <input type="checkbox"/> | <input type="checkbox"/> | <input type="checkbox"/> |
| 13 | Because of the hospitalisation I <b>do the groceries again</b>            | <input type="checkbox"/> | <input type="checkbox"/> | <input type="checkbox"/> | <input type="checkbox"/> |
| 14 | Because of the hospitalisation I <b>wash and dress myself again</b>       | <input type="checkbox"/> | <input type="checkbox"/> | <input type="checkbox"/> | <input type="checkbox"/> |
| 15 | Because of the hospitalisation I <b>garden again</b>                      | <input type="checkbox"/> | <input type="checkbox"/> | <input type="checkbox"/> | <input type="checkbox"/> |
| 16 | Because of the hospitalisation I <b>participate in sports again</b>       | <input type="checkbox"/> | <input type="checkbox"/> | <input type="checkbox"/> | <input type="checkbox"/> |

|    |                                                                       | Not at all               | Somewhat                 | Quite                    | Completely               |
|----|-----------------------------------------------------------------------|--------------------------|--------------------------|--------------------------|--------------------------|
| 17 | Because of the hospitalisation I <b>can resumed my hobbies</b>        | <input type="checkbox"/> | <input type="checkbox"/> | <input type="checkbox"/> | <input type="checkbox"/> |
| 18 | Because of the hospitalisation I <b>drive again</b>                   | <input type="checkbox"/> | <input type="checkbox"/> | <input type="checkbox"/> | <input type="checkbox"/> |
| 19 | Because of the hospitalisation I <b>go on outings again</b>           | <input type="checkbox"/> | <input type="checkbox"/> | <input type="checkbox"/> | <input type="checkbox"/> |
| 20 | Because of the hospitalisation I <b>visit family or friends again</b> | <input type="checkbox"/> | <input type="checkbox"/> | <input type="checkbox"/> | <input type="checkbox"/> |
| 21 | Because of the hospitalisation I <b>am back in my own home</b>        | <input type="checkbox"/> | <input type="checkbox"/> | <input type="checkbox"/> | <input type="checkbox"/> |
| 22 | Because of the hospitalisation I <b>regained independence</b>         | <input type="checkbox"/> | <input type="checkbox"/> | <input type="checkbox"/> | <input type="checkbox"/> |
| 23 | Because of the hospitalisation _____                                  | <input type="checkbox"/> | <input type="checkbox"/> | <input type="checkbox"/> | <input type="checkbox"/> |

# BMJ Open

## Development of a new tool for the assessment of patient defined benefit in hospitalised older patients: the Patient Benefit Assessment Scale for Hospitalised Older Patients (P-BAS HOP)

|                                 |                                                                                                                                                                                                                                                                                                                                                                                                                                                                                            |
|---------------------------------|--------------------------------------------------------------------------------------------------------------------------------------------------------------------------------------------------------------------------------------------------------------------------------------------------------------------------------------------------------------------------------------------------------------------------------------------------------------------------------------------|
| Journal:                        | <i>BMJ Open</i>                                                                                                                                                                                                                                                                                                                                                                                                                                                                            |
| Manuscript ID                   | bmjopen-2020-038203.R2                                                                                                                                                                                                                                                                                                                                                                                                                                                                     |
| Article Type:                   | Original research                                                                                                                                                                                                                                                                                                                                                                                                                                                                          |
| Date Submitted by the Author:   | 01-Oct-2020                                                                                                                                                                                                                                                                                                                                                                                                                                                                                |
| Complete List of Authors:       | van der Kluit, Maria; University Medical Centre Groningen, University Center for Geriatric Medicine<br>Dijkstra, Geke; Department of Health Sciences, Applied Health Research van Munster, Barbara; University of Groningen, University Medical Center Groningen, University Center for Geriatric Medicine; Gelre Hospitals, Geriatrics<br>De Rooij, Sophia; University Medical Center Groningen, University Center for Geriatric Medicine; Medical Spectrum Twente, Medical School Twente |
| <b>Primary Subject Heading</b>: | Geriatric medicine                                                                                                                                                                                                                                                                                                                                                                                                                                                                         |
| Secondary Subject Heading:      | Communication, Health services research, Research methods                                                                                                                                                                                                                                                                                                                                                                                                                                  |
| Keywords:                       | GERIATRIC MEDICINE, QUALITATIVE RESEARCH, Quality in health care < HEALTH SERVICES ADMINISTRATION & MANAGEMENT                                                                                                                                                                                                                                                                                                                                                                             |
|                                 |                                                                                                                                                                                                                                                                                                                                                                                                                                                                                            |

SCHOLARONE™  
Manuscripts



I, the Submitting Author has the right to grant and does grant on behalf of all authors of the Work (as defined in the below author licence), an exclusive licence and/or a non-exclusive licence for contributions from authors who are: i) UK Crown employees; ii) where BMJ has agreed a CC-BY licence shall apply, and/or iii) in accordance with the terms applicable for US Federal Government officers or employees acting as part of their official duties; on a worldwide, perpetual, irrevocable, royalty-free basis to BMJ Publishing Group Ltd ("BMJ") its licensees and where the relevant Journal is co-owned by BMJ to the co-owners of the Journal, to publish the Work in this journal and any other BMJ products and to exploit all rights, as set out in our [licence](#).

The Submitting Author accepts and understands that any supply made under these terms is made by BMJ to the Submitting Author unless you are acting as an employee on behalf of your employer or a postgraduate student of an affiliated institution which is paying any applicable article publishing charge ("APC") for Open Access articles. Where the Submitting Author wishes to make the Work available on an Open Access basis (and intends to pay the relevant APC), the terms of reuse of such Open Access shall be governed by a Creative Commons licence – details of these licences and which [Creative Commons](#) licence will apply to this Work are set out in our licence referred to above.

Other than as permitted in any relevant BMJ Author's Self Archiving Policies, I confirm this Work has not been accepted for publication elsewhere, is not being considered for publication elsewhere and does not duplicate material already published. I confirm all authors consent to publication of this Work and authorise the granting of this licence.

1  
2  
3 **Development of a new tool for the assessment of patient defined benefit in hospitalised older**  
4 **patients: the Patient Benefit Assessment Scale for Hospitalised Older Patients (P-BAS HOP)**  
5  
6  
7

8 **Authors:**  
9

- 10 1. Maria Johanna van der Kluit, MSc RN (Corresponding author)  
11  
12 University of Groningen, University Medical Center Groningen, University Center for Geriatric  
13  
14 Medicine, Hanzeplein 1, 9700 RB Groningen, The Netherlands  
15  
16 [m.j.van.der.kluit@umcg.nl](mailto:m.j.van.der.kluit@umcg.nl)  
17  
18 +31503613921  
19  
20  
21 2. Geke J. Dijkstra, PhD  
22  
23 University of Groningen, University Medical Center Groningen, Department of Health Sciences,  
24  
25 Applied Health Research, Groningen, The Netherlands  
26  
27 [g.j.dijkstra@umcg.nl](mailto:g.j.dijkstra@umcg.nl)  
28  
29  
30 3. Barbara C. van Munster, MD PhD  
31  
32 University of Groningen, University Medical Center Groningen, University Center for Geriatric  
33  
34 Medicine, Groningen, The Netherlands.  
35  
36 Department of Geriatrics, Gelre Hospitals, Apeldoorn, The Netherlands.  
37  
38 [b.c.van.munster@umcg.nl](mailto:b.c.van.munster@umcg.nl)  
39  
40  
41 4. Sophia E. de Rooij, MD PhD  
42  
43 University of Groningen, University Medical Center Groningen, University Center for Geriatric  
44  
45 Medicine, Groningen, The Netherlands  
46  
47 Medical Spectrum Twente, Medical School Twente, Enschede, The Netherlands  
48  
49  
50 [sejaderooij@gmail.com](mailto:sejaderooij@gmail.com)  
51

52 Words: 4784

53 Words abstract: 299

54 References: 31

55 Figures: 1

56 Tables: 4  
57  
58  
59  
60

## ABSTRACT

**Objectives:** To support the shift from disease-oriented towards goal-oriented care, we aimed to develop a tool which is capable both to identify priorities of an individual older hospitalised patient and to measure the outcomes relevant to him.

**Design:** Mixed methods design with open interviews, Three Step Test Interviews (TSTI), and a quantitative field test.

**Setting:** University teaching hospital and a regional teaching hospital.

**Participants:** Hospitalised patients ages 70 years and older.

**Results:** The Patient Benefit Assessment Scale for Hospitalised Older Patients (P-BAS HOP) consists of a baseline questionnaire and an evaluation questionnaire. Items were based on 15 qualitative interviews with hospitalised older patients. Feedback from a panel of four community-dwelling older persons resulted in some adaptations to wording and one additional item. Twenty-six hospitalised older patients participated in TSTIs with Version 1 of the baseline questionnaire, revealing indications for a good content validity and barriers in completion behaviour, global understanding, and understanding of individual items, which were solved with several adaptations. Four additions were made by participants. After TSTIs with ten patients with the evaluation questionnaire, one adaptation was made. A field test with 91 hospitalised older patients revealed a small number of missing values.

To enhance the feasibility, the number of items was reduced from 32 to 23, based on correlations and mean impact score. The field test was repeated with 104 other patients in a regional teaching hospital. To enhance the understanding, the tool was split into two phases. This version was tested with TSTIs with eight patients and appeared to be understandable. The final version was an interview-based tool and took about 11 minutes to complete.

**Conclusions:** The P-BAS HOP is a potentially suitable tool to identify priorities and relevant outcomes of the individual patient. Further research is needed to investigate its validity, reliability and responsiveness.

**Keywords** Geriatric medicine; Older adults; Hospitalisation; Patient perspective; Goal setting; Patient-reported outcomes; Tool; Value-Based Health Care

## ARTICLE SUMMARY

### Strengths and limitations of this study

- The content of the P-BAS HOP is based on open interviews with hospitalised older patients.
- Patients are able to indicate their individual outcome priorities.

- 1  
2  
3 ● The P-BAS HOP is tested intensively in the target population with Three Step Test Interviews. This  
4 gave valuable insights into the understanding of the tool and the completion behaviour of the  
5 participants.  
6  
7  
8 ● The current version of the P-BAS HOP is only suitable to be completed with an interviewer and  
9 not as a self-administered questionnaire.  
10  
11 ● It is unknown whether the P-BAS HOP is feasible in other healthcare systems, languages and  
12 cultures than in the Netherlands.  
13  
14  
15  
16  
17  
18  
19  
20  
21  
22  
23  
24  
25  
26  
27  
28  
29  
30  
31  
32  
33  
34  
35  
36  
37  
38  
39  
40  
41  
42  
43  
44  
45  
46  
47  
48  
49  
50  
51  
52  
53  
54  
55  
56  
57  
58  
59  
60

For peer review only



## BACKGROUND

To fit the needs of the ageing population, and patients with multiple chronic diseases, a shift is recommended from disease-oriented towards goal-oriented care. Older patients with multimorbidity may be more interested in more personal goals such as for them important symptoms, functional status and social functioning than in traditional outcomes such as survival and biomarkers,<sup>1, 2</sup> but these goals and outcomes differ per individual.<sup>3, 4</sup> When care would be systematically evaluated by personal goal-oriented outcomes, a tool is needed which is capable both to identify the priorities of the individual patient and to measure the outcomes relevant to him.

Three literature reviews<sup>5-7</sup> into tools used to assess patient outcome priorities in the context of multimorbidity revealed a few potentially useful tools. Tools only suitable for specific activities, such as the Canadian Occupational Performance Measure (COPM),<sup>5, 7</sup> Self-Identified Goals Assessment (SIGA),<sup>7</sup> Assessment of Motor and Process Skills (AMPS) and McMaster Toronto Arthritis (MACTAR)<sup>5</sup> were ignored. A general tool is the Outcome Prioritization Instrument,<sup>6, 8</sup> which is suitable to elicit four patient priorities, but these priorities are still very global and it remains unclear how to evaluate them after treatment. Another tool is the Goal Attainment Scaling (GAS)<sup>5, 7</sup> which is designed to set and evaluate individualized goals and outcomes. Disadvantages of the GAS are that it can be too challenging for patients to articulate their own goals and that it is time consuming.<sup>9</sup> The International Classification of Functioning, Disability and Health (ICF) framework for goal setting is used to categorize patient goals set in semi-structured interviews, but has still the same disadvantages as the GAS and has, in addition, a very poor responsiveness.<sup>7</sup> Finally, with the Target Complaints,<sup>5</sup> the patient defines target complaints as those problems for which help was sought. These complaints are scored at the beginning and at the end of the treatment by the patient, or the patient rates the degree of improvement.<sup>10, 11</sup> The Target Complaints is individualized and patient-centred. However, it focuses solely on problems and not on goals. Disadvantages for the GAS, ICF and Target Complaints could be that for some older patients it might be difficult to formulate their own goals and problems because many older persons are not accustomed to defining and discussing personal goals and prompting is often necessary.<sup>12</sup> The quality of the answers is therefore dependent on the interviewer's experiences and techniques.

For this reason, another method of defining patient-defined goals and outcomes was sought and found in the literature about treatment of acne. Augustin et al.<sup>13</sup> developed a tool consisting of two parts: 1) a baseline questionnaire to assess the importance of various predefined goals, based on themes derived from qualitative interviews in patients with acne and 2) an evaluation questionnaire to evaluate the extent to which treatment helped to achieve these goals. Based on these data it is possible to compute an individual Patient Benefit Index. This is an overall value between 0 (no benefit) and 4 (maximal benefit), which reflects the achievement of the goals weighted by the

1  
2  
3 importance.<sup>13</sup> The advantage of this tool is the insight into the individualized patient perspective,  
4 together with standardisation.

5  
6 The aim of this study was to develop a tool to inventory individual goals and benefits of older  
7 hospitalised patients, based on the model of Augustin et al.<sup>13</sup> This article presents its development,  
8 early testing and adaptations.  
9  
10

## 11 12 13 **METHODS**

14 The steps used to develop the Patient Benefit Assessment Scale for Hospitalised Older Patients (P-  
15 BAS HOP) are based on the steps of De Vet et al.<sup>14</sup> and outlined in Figure 1. After each step, the tool  
16 was adapted. The steps are explained in the following sections. For the readability, the methods and  
17 results of each step are alternated. The P-BAS was developed and tested in Dutch. The P-BAS was  
18 translated into English in a translation - back translation procedure involving four translators (two  
19 native English, two native Dutch), a language professional and authors MJvdK and GD.<sup>15</sup>  
20  
21  
22  
23  
24  
25

### 26 **Patient and public involvement**

27 Patients and public were involved in the generation of the items, the importance and relevance of  
28 the items and the assessment of the feasibility and understanding of the tool.  
29  
30  
31  
32

33 Figure 1. Development of the P-BAS HOP  
34  
35

#### 36 **1. Qualitative study**

37 Firstly, open interviews with hospitalised older medical and surgical patients about their goals  
38 regarding their hospitalisation were performed. The description of these goals is published  
39 elsewhere.<sup>3</sup> These goals were then coded inductively and transformed into questionnaire items, and  
40 the first draft of the P-BAS HOP was then constructed, consisting of a baseline questionnaire and an  
41 evaluation questionnaire.  
42  
43  
44  
45  
46  
47

#### 48 **2. Panel of community-dwelling older persons**

49 The first draft version was proposed by e-mail to a panel of community-dwelling older persons to  
50 assess the comprehensibility and relevance of the items and the tool and ask for omissions or  
51 redundancies.  
52  
53  
54  
55

## 56 **Results**

57 Four community-dwelling older persons gave written feedback on the draft version of the tool. This  
58 led to adaptation in wording of the introduction text and to some items which were not clear enough  
59  
60

1  
2  
3 or could be interpreted in multiple ways. An example of an item that was adapted: for the item 'to be  
4 able to eat', it was not clear if it concerned the instrumental activity of eating or concerned appetite.  
5 Therefore, the item was changed into 'can take pleasure in eating'.  
6  
7  
8 Further, one additional item was added, namely 'to wash and dress yourself' and the sequence of  
9 two items was changed. Version 1 of the P-BAS HOP is shown in Appendix 1.  
10  
11  
12

### 13 **3. Pilot test: Three Step Test Interview (TSTI).**

14  
15 The adapted tool (Version 1, Appendix 1) was tested with the TSTI<sup>16, 17</sup> in older hospitalised patients.  
16 The TSTI is a type of cognitive interview suitable to assess how people interpret a questionnaire, its  
17 different items and what kind of strategies they use in responding to them. The TSTI consists of the  
18 following steps:  
19  
20

#### 21 **Step 1: Concurrent thinking aloud**

22  
23 The participant completed version 1 of the P-BAS HOP while thinking aloud. The interviewer  
24 observed, made notes of the participant's behaviour (hesitations, skipping questions, corrections)  
25 and verbalized thoughts. However, the interviewer did not talk, or intervene. The instructions for the  
26 participant were: Please fill in this questionnaire and try to think aloud about what your thoughts are  
27 while reading the questions and choosing the right response category.  
28  
29

#### 30 **Step 2: Retrospective interview**

31  
32 With the retrospective interview any gaps from the first step were filled in. Every behaviour and  
33 thought from the observation of which the interviewer wanted further information, was clarified.  
34  
35

#### 36 **Step 3: Semi-structured interview**

37  
38 An in-depth interview was conducted, aimed at eliciting the participant's considerations and  
39 opinions. The participant was given the opportunity to explain behaviour, actions or thoughts that he  
40 had in the previous steps. The participant was asked how he understood different items, was asked  
41 for any omissions and his opinion about filling in the questionnaire. The participant was also asked  
42 to explain his goals in his own words in order to perform a first content validation of the P-BAS HOP.  
43  
44  
45  
46  
47

#### 48 **Participants**

49  
50 Eligible participants of the TSTI were 70 years and older; planned or unplanned hospitalised on  
51 medical or surgical wards of a university teaching hospital in the Netherlands; able to speak and  
52 understand Dutch and were without cognitive impairment. Inclusion criteria were verified with the  
53 staff nurse, and patients were then approached by the interviewer (MJvdK). Participants were  
54 completely anonymous, no list with names or other identifying data was made, nor did the  
55 researchers have access to medical records. Participants gave verbal consent to the interview and  
56 audio recording.  
57  
58  
59  
60

## Data analysis

Data gathering and data analysis were alternated. Interviews were audio recorded and transcribed verbatim. All remarks were then organised by question and step. After that, the data were coded by MJvdK and grouped into categories. The tool was adapted several times after the feedback until it was considered feasible and understandable.

The TSTI was repeated with the evaluation questionnaire. This was done at patient discharge.

## Results

### Sample baseline questionnaire

Twenty-six older hospitalised patients participated in the TSTI. Characteristics of the participants are displayed in the second column of Table 1.

Table 1. Participants Three Steps Test Interview (TSTI) baseline questionnaire version 1, evaluation questionnaire version 1 and baseline questionnaire version 3.

|                    | Baseline questionnaire version 1 (n=26) | Evaluation questionnaire version 1 (n=10) | Baseline questionnaire version 3 (n=8) |
|--------------------|-----------------------------------------|-------------------------------------------|----------------------------------------|
| Characteristic     | n                                       | n                                         | n                                      |
| Gender             |                                         |                                           |                                        |
| Male               | 19                                      | 8                                         | 4                                      |
| Female             | 7                                       | 2                                         | 4                                      |
| Age (years)        |                                         |                                           |                                        |
| 70-79              | 18                                      | 8                                         | 7                                      |
| 80-89              | 7                                       | 2                                         | 0                                      |
| 90-99              | 1                                       | 0                                         | 1                                      |
| Native language    |                                         |                                           |                                        |
| Dutch              | 14                                      | 7                                         | 7                                      |
| Local dialect      | 10                                      | 2                                         | 1                                      |
| Frisian            | 2                                       | 0                                         | 0                                      |
| Foreign language   | 0                                       | 1                                         | 0                                      |
| Educational level* |                                         |                                           |                                        |
| Low                | 8                                       | 5                                         | 2                                      |

|                      |    |   |   |
|----------------------|----|---|---|
| Middle               | 10 | 4 | 5 |
| High                 | 8  | 1 | 1 |
| Admission reason†    |    |   |   |
| Cardiac problems     | 9  | 1 | 1 |
| Pulmonary problems   | 7  | 3 | 2 |
| Bowel problems       | 2  | 2 | 1 |
| Fever/ infection     | 2  | 2 | 0 |
| Vascular surgery     | 2  | 1 | 0 |
| Cancer               | 2  | 0 | 0 |
| Accident/fracture(s) | 2  | 0 | 1 |
| Kidney problems      | 0  | 1 | 1 |
| Syncope              | 0  | 0 | 1 |
| Ulcers               | 0  | 0 | 1 |

\* Definition educational level: Low= no education, primary school, basic vocational training; Middle = secondary education, vocational training; High = bachelor, master

† Reason according to the patient

### Coding categories

The codes were sorted into the following categories: Completion behaviour, Global understanding, Understanding and reactions regarding individual items, Additions, General evaluation, and Content validity.

### *Completion behaviour*

With 'completion behaviour' is meant the behaviour participants showed when completing the questionnaire. Observations revealed that many participants skipped the instruction text partly or even completely. For some participants, reading these instructions was demanding, others did not understand how a table works and where to place a mark. Adding an example table with instructions showing how and where to place a mark brought no improvements. In the final version boxes to tick were included in the table.

### *Global understanding*

Many examples of correct understanding were coded. For example:

*Item regaining weight, step 1: Oops, dear, pooh, let's see, that is certainly important, because I have lost weight lately since I had not been feeling well for a while, that is, not*

1  
2  
3 *shortness of breath or anything, but, very tired, listless. So, a little weight gain is important.*

4  
5 (P9)

6  
7 Or:

8  
9 Item walking, step 1: *Well, I walk well. Doesn't apply to me. (P17)*

10  
11 A few participants interpreted the questions as if it was an evaluation of their current level of  
12 functioning. For example:

13  
14 Item energy, step 2: *I: You have filled in 'not at all' in 'you have more energy'. What is the*  
15 *reason that you just ...? P: Because I feel lethargic. That is what I mean to say. I used to be a*  
16 *very energetic person. (...) That is gone. (...) That is what I mean by that question. I: Yes, so*  
17 *you actually filled in how you are feeling now. P: Yes, now. At the time. I: Yes, so you say .. P:*  
18 *Not from last year or half a year ago. They are snapshots, aren't they? That was what you*  
19 *meant, right? (...) I: And when I ask you the question: 'How important is it that you get energy*  
20 *again?' P: Very important. (...) Because I've always been energetic. Very important. (P2)*  
21  
22  
23  
24  
25  
26  
27

28 Other participants had difficulties relating the goals to their own situation. For example:

29  
30 Item *shortness of breath, step 1 I'm actually never short of breath. But it is quite important.*  
31  
32 (P25)

33 There were also participants who did recognize that a certain goal did not apply for them, but they  
34 did not understand how to indicate that in the tool.

35 Some participants were reluctant to use the options 'not at all important' or 'doesn't apply to me',  
36 because they deemed those answers socially undesirable.  
37  
38  
39  
40

41 Since many older persons have multiple health problems, it is possible that a participant experiences  
42 a problem with an item, but is admitted for another health problem. Many participants were able to  
43 make this distinction. For example:  
44  
45

46 Item moving, step 1: *Yes, that will never be all right again, I can tell. Does no longer apply at*  
47 *all. Already 30 years ago they said: Mr. B., you have to learn to live with that. And they still*  
48 *say that today. Osteoarthritis, there is nothing you can do about it. (P18)*  
49  
50

51 But for others this distinction was more difficult.  
52  
53

#### 54 55 *Adaptations*

56 To enhance the general understanding, the following adaptations to the tool were made and tested  
57 in new participants:  
58  
59

60 Several adaptations were made in the instruction text.

1  
2  
3 In the columns with the answer options the word 'important' was added to all answer options. For  
4 example: 'very' was changed into 'very important', to make clear that the question was not to  
5 evaluate current function, but to indicate how important the goal was.  
6  
7

8 The sequence of the questions was changed. To enable participants to relate the goals to their own  
9 situation, the questions related to somatic complaints were moved to the beginning of the  
10 questionnaire.  
11  
12

13 Another adaptation made to improve the understanding to relate the goals to the patients' own  
14 situation, was to add the word 'again' to the goals, to make clear that it is something they had before  
15 and they have to regain by the hospital admission. For example: *How important is it to you that you*  
16 *have normal bowel movements again.*  
17  
18

19 The next adaptation was to move the answer option 'doesn't apply to me' from the last to the first  
20 column. This made it easier to find that option.  
21  
22

23 The final adaptation to improve making the connection between the hospital admission and their  
24 goals, was repeating the question in every line. Instead of having the text '*How important is it to you*  
25 *that by this hospital admission...*' on top of the page alone, this question was repeated in every row.  
26  
27

28 Apart from this, several adaptations were made to the layout in order to ease the reading for  
29 participants.  
30  
31

### 32 33 *Understanding and reactions regarding individual items*

34 The following individual items caused discussion: take pleasure in eating, to know the cause of your  
35 complaints, take a short break, and remain alive.  
36  
37

#### 38 39 *Take pleasure in eating*

40 Some participants had a more epicurean association with this item. Therefore, it was changed into:  
41  
42 'regain appetite'.  
43  
44

#### 45 46 *Cause of complaints*

47 With the item 'how important is it for you that you know the cause of your complaints?' some  
48 participants spontaneously started to describe risk factors like smoking. By changing the item into  
49 'knowing what is wrong with you', this was solved.  
50  
51  
52

#### 53 54 *Take a short break*

55 The item 'can take a short break' gave many different interpretations, often without any relationship  
56 with the hospital. Several alternatives were tried: 'to recharge', 'to take a moment', but these did not  
57 improve the understanding. It was therefore decided to remove this item.  
58  
59  
60

### *Remain alive*

The item 'remain alive' gave mixed reactions. Some were irritated by the question. For others it was obvious that it was very important to them that they wanted to remain alive, by adding words like 'of course!'. However, there were also participants who deemed remaining alive less obvious and started to think about the question. Unless the mixed reactions to this question, it was remained because it was not obvious for all participants and because the researchers considered it unreasonable to have a questionnaire with many potential outcomes, but to omit the one outcome that for many participants is considered as the most important.

### *Additions*

Participants gave the following suggestions which were added to the questionnaire: family life, driving, hobbies, urinating. The adaptations and additions led to P-BAS HOP Version 2.

### *General evaluation*

Many participants stated that the questionnaire was quite easy to fill out, although this was not always congruent with the observations about their understanding. Several mentioned enjoying filling in the questionnaire. One participant mentioned that the tool was very important for him in order to state his own priorities. For another participant the questionnaire was considered emotional, because the questions were confronting and he was afraid that many goals were not feasible. For some the questionnaire was somewhat tiring.

### *Content Validity*

The goals the participants mentioned in their own words, were qualified in the questionnaire as at least 'somewhat important' in almost all cases. For example:

*Yes, that is the quality of life .. Yes, it is important that comes up to standard again. (..) Well, cycling that, that comes in second place. I think **walking** is more important than ehm .. (...) I have been a volunteer for more than forty years now, helping people fill out tax forms. I think that is important to me. And that is, that is, that is also the **volunteer work**. If it is somewhat possible I would like to do that again. (...) Ehm, **go on outings**. I would like to keep doing things like that. (P14)*

This participant filled in in the questionnaire: Walking: quite important, (volunteer) work: moderately important, go on outings: moderately important.

TSTI evaluation questionnaire



### *Sample evaluation questionnaire*

Ten patients participated in the TSTI for the evaluation questionnaire at discharge. The sampling of the participants continued until the last version of the questionnaire was considered clear and did not reveal any new problems. Characteristics of the participants are displayed in the third column of Table 1.

### *Process of testing and adaptations*

The process of testing and adapting the evaluation questionnaire was much faster, because many problems with layout and wording of individual items had already been solved in the baseline phase. In the first version, the wording appeared to be too complicated for some participants. Therefore, the original formulation: 'The hospitalisation helped me to....' Was changed into: 'Because of the hospitalisation....'. This adaptation was clear for all the following participants and led to Version 2.

#### **4. Field test with Version 2. Item reduction based on mean impact score and correlation.**

Version 2 was tested with a new group of hospitalised older patients. The aim of this field test was to assess the feasibility of the P-BAS HOP in combination with other questionnaires. The trained research assistants observed during the field test that the tool was too time consuming and that some patients still had difficulties relating the questions to their personal situation, as was observed in the TSTI. Therefore, the following extra adaptations were made: item reduction, answer option reduction, and splitting the tool into two phases.

#### **Participants**

Eligible participants were consecutive patients aged 70 years and older; planned or unplanned hospitalised on medical or surgical wards of a university teaching hospital, expected to stay for at least 48 hours; and at maximal four days hospitalised at the moment of interviewing; able to speak and understand Dutch and were without cognitive impairment. Inclusion criteria were verified with the staff nurse. Patients were approached by a trained research assistant and gave signed informed consent to participate. The questionnaire was then conducted in a face to face interview with the research assistant, but to patients in a better condition and with middle or higher education the opportunity was given to fill in the questionnaire themselves, an option which only a minority of patients choose.

#### **Item reduction**

As this is a formative tool, item reduction procedures suitable for reflective tools, such as based on factor analysis and Cronbach's alpha, are not relevant.<sup>14</sup> Item reduction was therefore based on correlation and mean impact score.

Items within one category with a strong correlation, measured probably the same construct.

Therefore, from dyads with a Spearman's rank-order correlation > 0.7, one item was removed.<sup>14</sup> For the calculation of the Spearman's rank-order correlation coefficient, the answer option 'does not apply to me now' and 'not at all important' were coded as 0, the options somewhat, moderately, quite important and very important were coded respectively as 1, 2, 3, 4.

For the reduction based on mean impact score, all items were sorted into categories. For each item the mean impact score was calculated: [% for whom the item played a role] \* [mean importance for that item]. From every category with two or more items, the item with the lowest mean impact score was removed.<sup>14</sup> The field test was repeated in a regional teaching hospital by a trained research assistant, to check whether the impact differed in another context.

## Results

The Benefit Assessment Scale Version 2 consisted of 32 items. In the three month inclusion period, 492 consecutive eligible patients meeting the inclusion criteria were admitted on the selected wards. Of these patients, 238 were not approached for logistic reasons, for example the patient could not be interviewed within the first four days because of absence for treatment, transfer from ward, shortage of research assistants. Hence, 254 patients were approached for informed consent and 106 patients (42%) gave informed consent. Of the 106 included patients, the P-BAS was not administered 15 times because of lack of time (for example patient had to leave for treatment or discharge) or the patient was too tired. This resulted in 91 administered P-BAS questionnaires. Of the 91 participants, 20 answered the questionnaire independently written and 71 were interviewed by the research assistant. Characteristics of the participants are displayed in Table 2 and the results are shown in Table 3.

Table 2. Participants Field test (n=91)

| Characteristic              | n            |
|-----------------------------|--------------|
| Gender                      |              |
| Male                        | 63           |
| Female                      | 28           |
| Age (years), median (range) | 75 (70 – 96) |
| Native language             |              |

|                           |    |
|---------------------------|----|
| Dutch                     | 55 |
| Local dialect             | 27 |
| Frisian                   | 3  |
| Unknown                   | 6  |
| <b>Educational level*</b> |    |
| Low                       | 22 |
| Middle                    | 47 |
| High                      | 22 |
| <b>Specialty</b>          |    |
| Medical                   | 42 |
| Surgical                  | 23 |
| Cardiology                | 26 |
| <b>Admission type</b>     |    |
| Acute                     | 60 |
| Elective                  | 31 |

\* Definition educational level: Low= no education, primary school, basic vocational training; Middle = secondary education, vocational training; High = bachelor, master

Table 3. Scores of Version 2 Benefit Assessment Scale Baseline. (n=91)

| Item                | Missing |         | Does not apply to me now<br>n (%) | Importance |           |            |           |           |
|---------------------|---------|---------|-----------------------------------|------------|-----------|------------|-----------|-----------|
|                     | Failed* | n.d.†   |                                   | Not at all | Some-what | Moderately | Quite     | Very      |
|                     | n (%)   | n (%)   |                                   | n (%)      | n (%)     | n (%)      | n (%)     | n (%)     |
| Better              | 1 (1.1) | 0       | 8 (8.8)                           | 0          | 1 (1.1)   | 2 (2.2)    | 17 (18.7) | 62 (68.1) |
| Weight              | 1 (1.1) | 1 (1.1) | 57 (62.6)                         | 10 (11.0)  | 4 (4.4)   | 7 (7.7)    | 3 (3.3)   | 8 (8.8)   |
| Condition           | 0       | 0       | 17 (18.7)                         | 2 (2.2)    | 1 (1.1)   | 6 (6.6)    | 31 (34.1) | 34 (37.4) |
| Energy              | 0       | 1 (1.1) | 18 (19.8)                         | 1 (1.1)    | 0         | 3 (3.3)    | 33 (36.3) | 35 (38.5) |
| Pain                | 1 (1.1) | 1 (1.1) | 33 (36.3)                         | 0          | 2 (2.2)   | 4 (4.4)    | 9 (9.9)   | 41 (45.1) |
| Bowel movements     | 0       | 1 (1.1) | 58 (63.7)                         | 4 (4.4)    | 2 (2.2)   | 1 (1.1)    | 12 (13.2) | 13 (14.3) |
| Urinate             | 0       | 1 (1.1) | 64 (70.3)                         | 4 (4.6)    | 0         | 1 (1.1)    | 10 (11.0) | 11 (12.1) |
| Shortness of breath | 1 (1.1) | 0       | 39 (42.9)                         | 1 (1.1)    | 2 (2.3)   | 5 (5.5)    | 11 (12.1) | 32 (35.2) |
| Walking             | 0       | 1 (1.1) | 32 (35.2)                         | 1 (1.1)    | 3 (3.3)   | 5 (5.5)    | 16 (17.6) | 33 (36.3) |
| Moving              | 0       | 1 (1.1) | 35 (38.5)                         | 1 (1.1)    | 2 (2.2)   | 5 (5.5)    | 18 (19.8) | 29 (31.9) |
| Appetite            | 0       | 2 (2.2) | 55 (60.4)                         | 1 (1.1)    | 2 (2.2)   | 6 (6.6)    | 9 (9.9)   | 16 (17.6) |
| Knowing what is     | 0       | 1 (1.1) | 32 (35.2)                         | 2 (2.2)    | 2 (2.2)   | 1 (1.1)    | 12 (13.2) | 41 (45.1) |

|                       |         |         |           |         |         |         |           |           |
|-----------------------|---------|---------|-----------|---------|---------|---------|-----------|-----------|
| wrong                 |         |         |           |         |         |         |           |           |
| Disease under control | 0       | 1 (1.1) | 10 (11.0) | 0       | 0       | 2 (2.2) | 15 (16.5) | 63 (69.2) |
| Alive                 | 0       | 1 (1.1) | 2 (2.2)   | 2 (2.2) | 1 (1.1) | 1 (1.1) | 13 (14.3) | 71 (78.0) |
| Enjoy                 | 0       | 2 (2.2) | 20 (22.0) | 0       | 0       | 2 (2.2) | 13 (14.3) | 54 (59.3) |
| Freedom               | 0       | 1 (1.1) | 31 (34.1) | 0       | 1 (1.1) | 1 (1.1) | 12 (13.2) | 45 (49.5) |
| Cooking               | 0       | 2 (2.3) | 51 (56.0) | 1 (1.1) | 4 (4.4) | 2 (2.2) | 14 (15.4) | 17 (18.7) |
| Housework             | 0       | 1 (1.1) | 51 (56.0) | 2 (2.2) | 5 (5.5) | 5 (5.5) | 10 (11.0) | 17 (18.7) |
| Groceries             | 0       | 1 (1.1) | 42 (46.2) | 1 (1.1) | 5 (5.5) | 9 (9.9) | 12 (13.2) | 21 (23.1) |
| Wash and dress        | 0       | 2 (2.3) | 51 (56.0) | 0       | 0       | 2 (2.2) | 14 (15.4) | 22 (24.2) |
| Garden                | 0       | 1 (1.1) | 48 (52.7) | 2 (2.2) | 1 (1.1) | 8 (8.8) | 10 (11.0) | 21 (23.1) |
| Sports                | 0       | 1 (1.1) | 46 (50.5) | 7 (7.7) | 2 (2.2) | 9 (9.9) | 7 (7.7)   | 19 (20.9) |
| Hobbies               | 0       | 1 (1.1) | 39 (42.9) | 1 (1.1) | 2 (2.2) | 4 (4.4) | 13 (14.3) | 31 (34.1) |
| Work                  | 0       | 3 (3.3) | 63 (69.2) | 3 (3.3) | 0       | 4 (4.4) | 7 (7.7)   | 11 (12.1) |
| Driving               | 0       | 2 (2.2) | 46 (50.2) | 1 (1.1) | 0       | 2 (2.2) | 8 (8.8)   | 32 (35.2) |
| Outings               | 0       | 1 (1.1) | 28 (30.8) | 1 (1.1) | 3 (3.3) | 8 (8.8) | 19 (20.9) | 31 (34.1) |
| Visiting              | 0       | 3 (3.3) | 28 (30.8) | 1 (1.1) | 4 (4.4) | 6 (6.6) | 19 (20.9) | 30 (33.0) |
| Family life           | 0       | 4 (4.4) | 39 (42.9) | 0       | 0       | 2 (2.2) | 12 (13.2) | 34 (37.4) |
| Home                  | 0       | 2 (2.3) | 21 (23.1) | 1 (1.1) | 0       | 1 (1.1) | 4 (4.4)   | 62 (68.1) |
| Independence          | 1 (1.1) | 3 (3.3) | 29 (31.9) | 0       | 1 (1.1) | 2 (2.2) | 6 (6.6)   | 49 (53.8) |

\* Measurement failed: invalid answer due to two options filled in

† n.d. = not done. No answer was given.

As seen in Table 3, the number of missing values ranges from zero to four per item. The answer options with the lowest priorities were used the least, especially 'not at all important' and 'somewhat important'. Therefore, and also because on reflection the options 'somewhat' and 'moderately' were very close, we decided to remove the option 'moderately'.

Four dyads had a Spearman's rank-order correlation coefficient > 0.7: energy and condition ( $r_s = .80$ ); moving and walking ( $r_s = .87$ ); cooking and groceries ( $r_s = .75$ ); cooking and housekeeping ( $r_s = .70$ ). Therefore of these dyads, one item was removed (condition, moving and cooking), inspired by the information derived from the TSTI's.

Table 4 shows the items with mean impact scores, sorted per category and descending mean impact scores. From the categories with at least two items, the item with the lowest mean impact score was removed. To give participants still the opportunity to indicate their individual priorities, even when being a minority, we added an open option to add extra individual goals.

Table 4. Mean impact scores per category.

| Goals | University hospital |            |      | Regional teaching hospital |            |      |
|-------|---------------------|------------|------|----------------------------|------------|------|
|       | Applied             | Importance | Mean | Applied                    | Importance | Mean |

|                                                    | (%) | score (M) | impact score | (%) | score (M) | impact score |
|----------------------------------------------------|-----|-----------|--------------|-----|-----------|--------------|
| <b>Remain alive</b>                                |     |           |              |     |           |              |
| Remain alive                                       | 98  | 3.70      | 3.62         | 75  | 2.64      | 1.90         |
| <b>Controlling disease</b>                         |     |           |              |     |           |              |
| Controlling disease                                | 89  | 3.76      | 3.34         | 29  | 2.43      | 0.70         |
| <b>Improving condition</b>                         |     |           |              |     |           |              |
| Feeling better                                     | 91  | 3.71      | 3.38         | 71  | 2.73      | 1.94         |
| Energy                                             | 80  | 3.40      | 2.72         | 50  | 2.23      | 1.12         |
| <i>Condition</i>                                   | 81  | 3.27      | 2.66         | 65  | 2.34      | 1.53         |
| <i>Weight</i>                                      | 36  | 1.84      | 0.66         | 9   | 2.33      | 0.20         |
| <b>Alleviating complaints</b>                      |     |           |              |     |           |              |
| Pain                                               | 63  | 3.59      | 2.26         | 44  | 2.72      | 1.20         |
| Breath                                             | 57  | 3.39      | 1.92         | 38  | 2.64      | 0.99         |
| Appetite                                           | 38  | 3.09      | 1.18         | 35  | 2.39      | 0.83         |
| Bowel                                              | 35  | 2.88      | 1.03         | 29  | 2.47      | 0.71         |
| <i>Urinate</i>                                     | 29  | 2.92      | 0.83         | 17  | 2.67      | 0.46         |
| <b>Enjoying life</b>                               |     |           |              |     |           |              |
| Enjoying life                                      | 78  | 3.75      | 2.91         | 31  | 2.53      | 0.78         |
| <b>Improving/maintaining social functioning</b>    |     |           |              |     |           |              |
| Outing                                             | 69  | 3.23      | 2.23         | 27  | 2.11      | 0.57         |
| Visiting                                           | 68  | 3.22      | 2.20         | 21  | 1.91      | 0.40         |
| <i>Family life</i>                                 | 55  | 3.67      | 2.03         | 5   | 2.80      | 0.13         |
| <b>Knowing what is wrong</b>                       |     |           |              |     |           |              |
| Wrong                                              | 64  | 3.52      | 2.27         | 39  | 2.58      | 0.99         |
| <b>Regaining/maintaining independence, freedom</b> |     |           |              |     |           |              |
| Home                                               | 76  | 3.85      | 2.94         | 15  | 2.50      | 0.39         |
| Independence                                       | 67  | 3.78      | 2.52         | 17  | 2.44      | 0.42         |
| <i>Freedom</i>                                     | 66  | 3.71      | 2.43         | 23  | 2.54      | 0.59         |
| <b>Improving daily functioning</b>                 |     |           |              |     |           |              |
| Walking                                            | 64  | 3.33      | 2.14         | 54  | 2.57      | 1.38         |
| <i>Moving</i>                                      | 61  | 3.31      | 2.02         | 34  | 2.54      | 0.86         |
| Driving                                            | 48  | 3.63      | 1.75         | 14  | 2.13      | 0.31         |
| Groceries                                          | 53  | 2.98      | 1.59         | 19  | 2.30      | 0.44         |
| Wash/dress                                         | 43  | 3.53      | 1.52         | 26  | 2.52      | 0.65         |
| <i>Cooking</i>                                     | 43  | 3.11      | 1.33         | 15  | 1.75      | 0.27         |
| <i>Housework</i>                                   | 43  | 2.90      | 1.26         | 20  | 1.86      | 0.38         |
| <b>Resuming work/hobbies</b>                       |     |           |              |     |           |              |
| Hobbies                                            | 57  | 3.39      | 1.92         | 20  | 2.00      | 0.40         |
| Garden                                             | 47  | 3.12      | 1.46         | 16  | 1.24      | 0.20         |
| Sports                                             | 49  | 2.66      | 1.30         | 23  | 1.58      | 0.37         |
| <i>Work</i>                                        | 28  | 2.92      | 0.83         | 13  | 1.92      | 0.24         |

The removed items are indicated in italic.

#### Repetition field test in regional teaching hospital

The field test was repeated in a regional teaching hospital with the same items, but with fewer answer options and the questions in two steps, as explained in the next paragraph. In the eight week inclusion period, 209 patients meeting the inclusion criteria were admitted on the wards. Of these patients, 56 were not approached for logistic reasons. 153 Were therefore approached for informed consent and 104 patients (67%) gave informed consent. The items with the lowest mean impact scores were the same for most categories, except for the categories independence/freedom, improving daily functioning and work/hobbies.

#### Splitting tool into two phases

Since some problems with understanding remained, especially the difficulties relating the goals to their own situation, as described in the TSTI, we decided to split the tool into two phases. In the first phase an inventory of subjects with problems or limitations was made. These could be problems/limitations at the moment of interview, at admission, or expected problems/limitations. In the second phase, only the importance was asked for the goals related to the subjects that applied. As this adaptation complicated the tool, we decided to use it as an interview-based tool. The item reduction and splitting into two phases, resulted in P-BAS HOP version 3.

### 5. TSTI with Version 3.

Version 3 was tested again with the TSTI in hospitalised older patients. The procedure was identical as in step 3, however as this version is only applicable as an interview version, this was done with an interviewer and observant. The observant only observed during the first step, and took over the interview role in the second and third steps.

#### Results

Eight participants participated in the TSTI about Version 3. Characteristics of the participants are displayed in the last column of Table 1.

#### General understanding

In general, the tool in two phases was well-understood. For example:

Item *shortness of breath*, phase 1, step 1: *No, I have no problems with that, you know, shortness of breath. (A1)*

Or:

1  
2  
3 Item *shortness of breath*, phase 1, step 1: *Yes, that is present! And for that reason, I am*  
4 *admitted here. My oxygen was too low. And my carbon dioxide level is not good, much too*  
5 *high. Yes, complication of, yes. (A3)*  
6  
7

8 We shortened the instructions, but did not modify the content of the tool. This last adaptation led to  
9 the final questionnaire (Appendix 2). The completion of this baseline questionnaire took 5 to 24  
10 minutes, with a median of 11 minutes.  
11  
12  
13

## 14 15 16 **DISCUSSION**

17 The Patient Benefit Assessment Scale for Hospitalised Older patients (P-BAS HOP) was constructed as  
18 a tool that should be capable both to identify the goals and priorities of the individual older  
19 hospitalised patient and to measure the outcomes relevant to him regarding hospitalisation.  
20

21 The items of the P-BAS HOP were based on interviews with hospitalised older patients. Including  
22 patients in the generation of patient reported outcomes is not self-evident and is even absent in  
23 many cases.<sup>18</sup> But even when patients are involved in the generation of outcomes, they still only  
24 reflect the priorities of the overall patient population and not the individual patient. Therefore, the  
25 major advantage of the P-BAS HOP is that patients can indicate their individual priorities, which also  
26 leads to individual benefit-scores.  
27

28 Indicating individual priorities is also possible with the GAS, but the GAS is more time consuming,  
29 varying from 15-20 minutes for experienced assessors,<sup>19</sup> to 90 minutes per patient,<sup>20</sup> while the P-BAS  
30 HOP takes 5 to 24 minutes, with a median of 11 minutes. Moreover, for some older patients it might  
31 be difficult to formulate their own goals,<sup>12</sup> and the P-BAS HOP helps patients with examples of  
32 predefined goals.  
33

34 More recently, models for goal based decision making were developed,<sup>21-23</sup> but these methods are  
35 more suitable for clinical encounters to align treatment option with patient goals. The major  
36 advantage of the P-BAS HOP is that it is a more suitable and efficient tool to measure personalised  
37 outcomes in, for example, trials. It also could replace a diversity of existing tools, since it covers  
38 several dimension like symptoms, daily functioning, social functioning. Examples for which the P-BAS  
39 HOP could be used are to compare the personalised outcomes for alternatives of hospital admission,  
40 such as,<sup>24-27</sup> the effectiveness of better geriatric management of in-hospital patients,<sup>28</sup> or in a  
41 narrower way, to compare the effectiveness of different treatment methods on personalised  
42 outcomes.  
43

44 The pilot and field tests of the P-BAS HOP started already before we achieved complete saturation of  
45 goals in the qualitative interviews. Therefore, patients had the possibility to add goals during the  
46 TSTI. Several goals were added during the TSTI, which also appeared later in the qualitative  
47  
48  
49  
50  
51  
52  
53  
54  
55  
56  
57  
58  
59  
60

1  
2  
3 interviews.<sup>3</sup> Still, the qualitative interviews revealed later some extra target complaints, which were  
4 not included in the P-BAS HOP, such as vomiting, dizziness and sweating. Yet, in the final version of  
5 the P-BAS HOP, patients still have the opportunity to add personal goals which were not mentioned  
6 before.  
7  
8

9  
10 By using the mean impact score to reduce items, items considered least important by the overall  
11 sample were removed, though this does not take account of the priorities of individuals who deviate  
12 from the majority. For this reason the extra open option was added. Most removed items, based on  
13 mean impact score, were confirmed when repeated in the regional teaching hospital. The only  
14 exceptions were in the categories *improving daily functioning*, *resuming work/hobbies*, and  
15 *regaining/maintaining independence/freedom*.  
16  
17

18  
19 In the categories *improving daily functioning* and *resuming work/hobbies*, the lowest priorities were  
20 'housework' and 'work' in the first sample and 'driving' and 'gardening' in the second. Since driving  
21 and work were the second lowest priority in the second sample, the removal of housework and work  
22 could be justified.  
23  
24

25  
26 In the category *regaining/maintaining independence/freedom* priorities in both hospitals were  
27 entirely opposite. We therefore have to conclude that we were too early to remove the item  
28 freedom. It is unclear whether these differences are caused by different contexts or because the field  
29 test in the regional hospital was after splitting the questionnaire into two phases and therefore the  
30 questions were altered.  
31  
32

### 33 34 35 **Limitations**

36  
37 The P-BAS HOP is only tested in hospitalised patients without cognitive impairment. It is therefore  
38 unknown if it is suitable in other contexts and it might be too complex for patients with cognitive  
39 impairment. In addition, the P-BAS HOP is only tested in the Netherlands and the translated English  
40 version has not yet been tested. Therefore, it is unknown whether the P-BAS HOP is applicable in  
41 other languages and cultures.  
42  
43

44  
45 The TSTI gave valuable insights into the understanding of the questionnaire and the completion  
46 behaviour of the participants. Many adaptations were made, but it proved difficult to make the  
47 questionnaire understandable for all patients. These kinds of difficulties were seen in various  
48 examples where the TSTI was used.<sup>16, 29-31</sup> Unfortunately, the final version is only suitable to be  
49 completed with an interviewer and not as a self-administered questionnaire. The TSTI gave a first  
50 indication of the content validity, but further quantitative research into the construct validity, in  
51 which the priority of goals can be compared with experienced symptoms or limitations at admission  
52 and the achievement of goals can be compared with progression or deterioration of other  
53 constructs, test-retest reliability of baseline and evaluation questionnaire and responsivity to test  
54 the validity of the PBI is needed.  
55  
56  
57  
58  
59  
60



## Conclusions

The Patient Benefit Assessment Scale for Hospitalised Older Patients (P-BAS HOP) is a potentially suitable interview-based tool to identify the priorities and relevant outcomes of the individual older hospitalised adult. Based on these data it is possible to compute an individual Patient Benefit Index, which is an overall value between 0 (no benefit) and 3 (maximal benefit), which reflects the achievement of the goals weighted by the importance. Further quantitative research is needed to investigate the construct validity, reliability and responsiveness.

**Acknowledgements** We would like to thank all patients who participated in the interviews for sharing their stories with us and their feedback on the different versions of the P-BAS HOP. We thank the panel members for their feedback on the draft version. We would also like to thank all the research assistants and students for the many interviews they conducted, especially Gerdine Boot for all the patients she interviewed in the regional teaching hospital. We would like to thank Daniël Bosold, Janet Vroomen, Caroline Mutsaers, Margaretha Schenkeveld and Anna Pot for their role in the translation process of the P-BAS HOP.

**Funding** This study was funded by an unrestricted grant from the Dutch Foundation for Effective Elderly Care and the University of Groningen.

**Author's contribution** MJvdK designed the study. MJvdK conducted the Three Step Test Interviews (TSTI's). MJvdK coded the data of the TSTI's. MJvdK and SEdR regularly discussed the codes and the progress and adaptations of the different versions of the P-BAS HOP. SEdR supervised the field test in the University hospital, BCvM in the Regional teaching hospital. MJvdK wrote the first draft of the manuscript, GJD, BCvM and SEdR contributed significantly to subsequent manuscript revisions. All authors have read and approved the final version of the manuscript.

**Competing interests** None declared

**Data sharing** All data relevant to the study are included in the article

**Patient consent** All patients gave informed consent

## Ethical approval

The Medical Ethics Research Committee of the UMCG (file number M16.192615 and M16.199647) confirmed that the Medical Research Involving Human Subjects Act did not apply to the research project. Official approval by the committee was therefore not required.

## REFERENCES

- 1 Reuben DB, Tinetti ME. Goal-oriented patient care--an alternative health outcomes paradigm. *N Engl J Med* 2012;366:777-9 doi:10.1056/NEJMp1113631.
- 2 Tinetti ME, Naik AD, Dodson JA. Moving from disease-centered to patient goals-directed care for patients with multiple chronic conditions: Patient value-based care. *JAMA Cardiology* 2016;1:9-10 doi:10.1001/jamacardio.2015.0248.
- 3 Van der Kluit MJ, Dijkstra GJ, de Rooij S,E. Goals of older hospitalised patients: a qualitative descriptive study. *BMJ open* 2019;9:e029993- doi:10.1136/bmjopen-2019-029993.
- 4 Vermunt NP, Harmsen M, Elwyn G, et al. A three-goal model for patients with multimorbidity: A qualitative approach. *Health Expect* 2018;21:528-38 doi:10.1111/hex.12647 [doi].
- 5 Donnelly C, Carswell A. Individualized outcome measures: a review of the literature. *Can J Occup Ther* 2002;69:84-94.
- 6 Mangin D, Stephen G, Bismah V, et al. Making patient values visible in healthcare: a systematic review of tools to assess patient treatment priorities and preferences in the context of multimorbidity. *BMJ Open* 2016;6:e010903- doi:10.1136/bmjopen-2015-010903.
- 7 van Seben R, Reichardt L, Smorenburg S, et al. Goal-Setting Instruments in Geriatric Rehabilitation: A Systematic Review. *J Frailty Aging* 2017;6:37-45 doi:10.14283/jfa.2016.103.
- 8 Fried TR, Tinetti M, Agostini J, et al. Health outcome prioritization to elicit preferences of older persons with multiple health conditions. *Patient Educ Couns* 2011;83:278-82 doi:10.1016/j.pec.2010.04.032.
- 9 Stolee P, Awad M, Byrne K, et al. A multi-site study of the feasibility and clinical utility of Goal Attainment Scaling in geriatric day hospitals. *Disabil Rehabil* 2012;34:1716-26 doi:10.3109/09638288.2012.660600 [doi].
- 10 Battle CC, Imber SD, Hoehn-Saric R, et al. Target complaints as criteria of improvement. *Am J Psychother* 1966;20:184-92 doi:10.1176/appi.psychotherapy.1966.20.1.184 [doi].
- 11 Hesbacher PT, Rickels K, Weise C. Target symptoms: a promising improvement criterion in psychiatric drug research. *Arch Gen Psychiatry* 1968;18:595-600.
- 12 Schulman-Green DJ, Naik AD, Bradley EH, et al. Goal setting as a shared decision making strategy among clinicians and their older patients. *Patient Educ Couns* 2006;63:145-51 doi:S0738-3991(05)00275-2 [pii].
- 13 Augustin M, Reich C, Schaefer I, et al. Development and validation of a new instrument for the assessment of patient-defined benefit in the treatment of acne. *J Dtsch Dermatol Ges* 2008;6:113-20 doi:10.1111/j.1610-0387.2007.06540.x.
- 14 De Vet HCW, Terwee CB, Mokkink LB, et al. Measurement in Medicine. A Practical Guide. Cambridge: Cambridge University Press 2011.
- 15 Beaton DE, Bombardier C, Guillemin F, et al. Guidelines for the Process of Cross-Cultural Adaptation of Self-Report Measures. *Spine* 2000;25:3186-91 doi:10.1097/00007632-200012150-00014.

- 1  
2  
3 16 Pool JJM, Hiralal S, Ostelo, Raymond W J G, et al. Added value of qualitative studies in the  
4 development of health related patient reported outcomes such as the Pain Coping and Cognition List  
5 in patients with sub-acute neck pain. *Man Ther* 2010;15:43-7 doi:10.1016/j.math.2009.05.010.  
6  
7  
8 17 Van Der Veer K, Ommundsen R, Hak T, et al. Meaning Shift of Items in Different Language  
9 Versions. A Cross-National Validation Study of the Illegal Aliens Scale. *Quality and Quantity*  
10 2003;37:193-206.  
11  
12 18 Wiering B, de Boer D, Delnoij D. Patient involvement in the development of patient-reported  
13 outcome measures: a scoping review. *Health Expect* 2017;20:11-23 doi:10.1111/hex.12442 [doi].  
14  
15 19 Stolee P, Rockwood K, Fox RA, et al. The use of goal attainment scaling in a geriatric care setting. *J*  
16 *Am Geriatr Soc* 1992;40:574-8.  
17  
18  
19 20 Toto PE, Skidmore ER, Terhorst L, et al. Goal Attainment Scaling (GAS) in geriatric primary care: a  
20 feasibility study. *Arch Gerontol Geriatr* 2015;60:16-21 doi:10.1016/j.archger.2014.10.022 [doi].  
21  
22 21 Elwyn G, Vermunt NPCA. Goal-Based Shared Decision-Making: Developing an Integrated Model.  
23 *Journal of Patient Experience* 2019:1-9 doi:10.1177/2374373519878604.  
24  
25  
26 22 Naik AD, Dindo LN, Van Liew JR, et al. Development of a Clinically Feasible Process for Identifying  
27 Individual Health Priorities. *J Am Geriatr Soc* 2018;66:1872-9 doi:10.1111/jgs.15437 [doi].  
28  
29 23 Tinetti ME, Naik AD, Dindo L, et al. Association of Patient Priorities-Aligned Decision-Making With  
30 Patient Outcomes and Ambulatory Health Care Burden Among Older Adults With Multiple Chronic  
31 Conditions: A Nonrandomized Clinical Trial. *JAMA Intern Med* 2019;179:1688-97  
32 doi:10.1001/jamainternmed.2019.4235 [doi].  
33  
34  
35 24 Pouw MA, Calf AH, van Munster BC, et al. Hospital at Home care for older patients with cognitive  
36 impairment: a protocol for a randomised controlled feasibility trial. *BMJ Open* 2018;8:e020332,2017-  
37 020332 doi:10.1136/bmjopen-2017-020332 [doi].  
38  
39  
40 25 Ribbink ME, Macneil-Vroomen JL, van Seben R, et al. Investigating the effectiveness of care  
41 delivery at an acute geriatric community hospital for older adults in the Netherlands: a protocol for a  
42 prospective controlled observational study. *BMJ Open* 2020;10:e033802,2019-033802  
43 doi:10.1136/bmjopen-2019-033802 [doi].  
44  
45  
46 26 Shepperd S, Iliffe S, Doll H, et al. Admission avoidance hospital at home. *Cochrane Database Syst*  
47 *Rev* 2016;9:CD007491- doi:10.1002/14651858.CD007491.pub2.  
48  
49 27 Shepperd S, Craddock-Bamford A, Butler C, et al. A multi-centre randomised trial to compare the  
50 effectiveness of geriatrician-led admission avoidance hospital at home versus inpatient admission.  
51 *Trials* 2017;18:491,017-2214-y doi:10.1186/s13063-017-2214-y [doi].  
52  
53 28 Van Grootven B, Flamaing J, Dierckx de Casterlé B, et al. Effectiveness of in-hospital geriatric co-  
54 management: a systematic review and meta-analysis. *Age Ageing* 2017;46:903-10  
55 doi:10.1093/ageing/afx051 [doi].  
56  
57  
58 29 Jansen H, Hak T. The Productivity of the Three-step Test-interview (TSTI) Compared to an Expert  
59 Review of a Self-administered Questionnaire on Alcohol Consumption. *Journal of official statistics*  
60 2005;21:103-20.

1  
2  
3 30 Liu RD, Buffart LM, Kersten MJ, et al. Psychometric properties of two physical activity  
4 questionnaires, the AQuAA and the PASE, in cancer patients. *BMC Med Res Methodol*  
5 2011;11:30,2288-11-30 doi:10.1186/1471-2288-11-30 [doi].  
6

7  
8 31 van Alphen A, Westerman MJ, Visschedijk JH, et al. A qualitative study of Falls Efficacy Scale-  
9 International/Hips. What do we measure?. *Tijdschr Gerontol Geriatr* 2013;44:3-11  
10 doi:10.1007/s12439-013-0005-9 [doi].  
11  
12  
13  
14  
15  
16  
17  
18  
19  
20  
21  
22  
23  
24  
25  
26  
27  
28  
29  
30  
31  
32  
33  
34  
35  
36  
37  
38  
39  
40  
41  
42  
43  
44  
45  
46  
47  
48  
49  
50  
51  
52  
53  
54  
55  
56  
57  
58  
59  
60

For peer review only

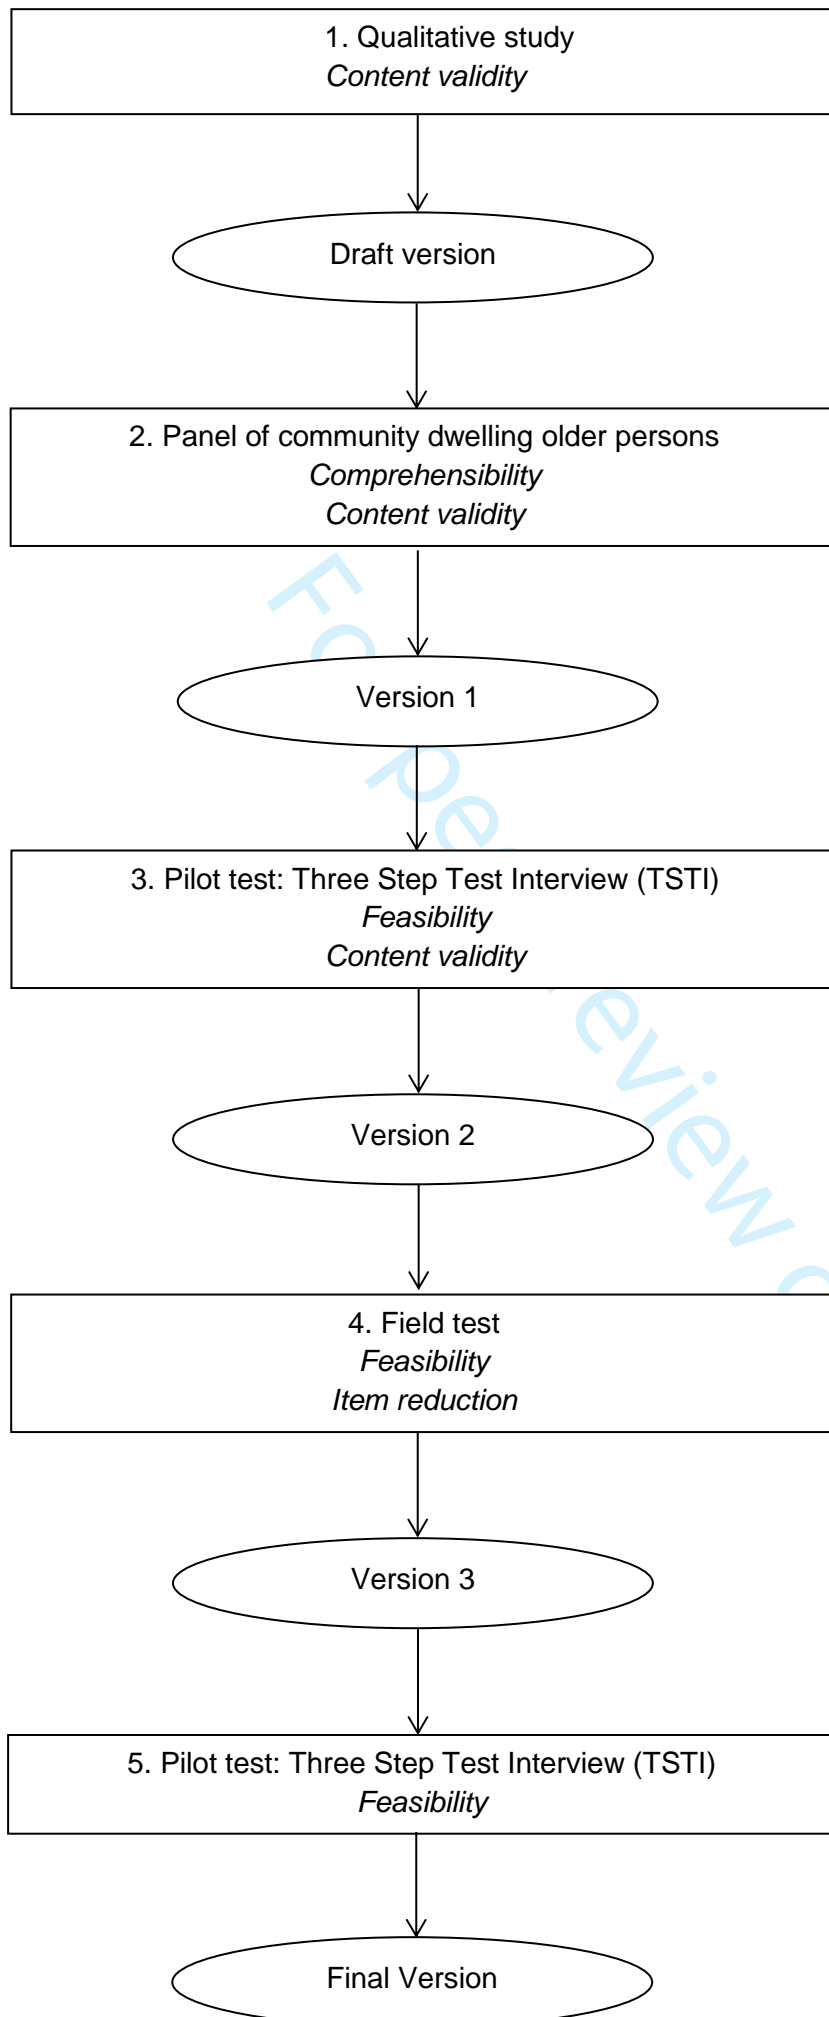

## Appendix 1. Version 1. Patient Benefit Assessment Scale

### Hospitalisation goals

The following questions cover how important the goals below are for you during your current hospitalisation.

Can you indicate how important each goal below is for you? You can choose from: 'not at all', 'somewhat', 'moderately', 'quite', or 'very'. If a goal doesn't apply to you, for example because you don't have difficulty with the listed problem (for example with bowel movements, or shortness of breath) or because you don't have a garden, then choose 'does not apply to me'.

|    | How important is it for you that through this hospitalisation... | Not at all | Somewhat | Moderately | Quite | Very | Does not apply to me |
|----|------------------------------------------------------------------|------------|----------|------------|-------|------|----------------------|
| 1  | You feel better                                                  |            |          |            |       |      |                      |
| 2  | You regain weight                                                |            |          |            |       |      |                      |
| 3  | Your condition improves                                          |            |          |            |       |      |                      |
| 4  | You have more energy                                             |            |          |            |       |      |                      |
| 5  | You can walk better                                              |            |          |            |       |      |                      |
| 6  | You move easier                                                  |            |          |            |       |      |                      |
| 7  | You can do housework                                             |            |          |            |       |      |                      |
| 8  | You can cook                                                     |            |          |            |       |      |                      |
| 9  | You can do the groceries                                         |            |          |            |       |      |                      |
| 10 | You can garden                                                   |            |          |            |       |      |                      |
| 11 | You can take pleasure in eating                                  |            |          |            |       |      |                      |
| 12 | You can wash and dress yourself                                  |            |          |            |       |      |                      |
| 13 | You can exercise or participate in sports                        |            |          |            |       |      |                      |
| 14 | You have no pain                                                 |            |          |            |       |      |                      |
| 15 | You have normal bowel movements                                  |            |          |            |       |      |                      |
| 16 | You have less shortness of breath                                |            |          |            |       |      |                      |
| 17 | Your disease is under control                                    |            |          |            |       |      |                      |
| 18 | You remain alive                                                 |            |          |            |       |      |                      |
| 19 | You can enjoy life                                               |            |          |            |       |      |                      |
| 20 | You regain your freedom                                          |            |          |            |       |      |                      |
| 21 | You can resume your (volunteer) work                             |            |          |            |       |      |                      |
| 22 | You can go on outings                                            |            |          |            |       |      |                      |
| 23 | You can visit friends or family                                  |            |          |            |       |      |                      |
| 24 | You can take a short break                                       |            |          |            |       |      |                      |
| 25 | You know the cause of your complaints                            |            |          |            |       |      |                      |
| 26 | You can go back home                                             |            |          |            |       |      |                      |
| 27 | You regain your independence                                     |            |          |            |       |      |                      |

### Evaluation of hospitalisation goals

In the beginning of your hospitalisation you indicated how important various goals for you were. Can you indicate for each of the goals below how much the hospitalisation has helped to achieving the goal? You can indicate whether the hospitalisation helped you 'not at all', 'somewhat', 'moderately' 'quite', or 'very'. If a goal didn't apply to you, for example because you didn't have difficulty with the listed problem (for example with bowel movements, or shortness of breath) or because you have no garden, then choose 'did not apply to me'.

|    | The hospitalisation helped me to...         | Not at all | Somewhat | Moderately | Quite | Very | Did not apply to me |
|----|---------------------------------------------|------------|----------|------------|-------|------|---------------------|
| 1  | Feel better                                 |            |          |            |       |      |                     |
| 2  | Regain weight                               |            |          |            |       |      |                     |
| 3  | Improve my condition                        |            |          |            |       |      |                     |
| 4  | Have more energy                            |            |          |            |       |      |                     |
| 5  | Walk better                                 |            |          |            |       |      |                     |
| 6  | Move easier                                 |            |          |            |       |      |                     |
| 7  | Do the housework                            |            |          |            |       |      |                     |
| 8  | Cook                                        |            |          |            |       |      |                     |
| 9  | Do the groceries                            |            |          |            |       |      |                     |
| 10 | Garden                                      |            |          |            |       |      |                     |
| 11 | Take pleasure in eating                     |            |          |            |       |      |                     |
| 12 | Wash and dress myself                       |            |          |            |       |      |                     |
| 13 | Exercise or Participate in sports           |            |          |            |       |      |                     |
| 14 | Have no pain                                |            |          |            |       |      |                     |
| 15 | Have normal bowel movements                 |            |          |            |       |      |                     |
| 16 | Have less shortness of breath               |            |          |            |       |      |                     |
| 17 | Keep my disease under control               |            |          |            |       |      |                     |
| 18 | Remain alive                                |            |          |            |       |      |                     |
| 19 | Enjoy life                                  |            |          |            |       |      |                     |
| 20 | Regain my freedom                           |            |          |            |       |      |                     |
| 21 | Resume my volunteer work                    |            |          |            |       |      |                     |
| 22 | Go on outings                               |            |          |            |       |      |                     |
| 23 | Visit family or friends                     |            |          |            |       |      |                     |
| 24 | Can take a short break                      |            |          |            |       |      |                     |
| 25 | Know what the cause of my complaints is/was |            |          |            |       |      |                     |
| 26 | Go back to my home                          |            |          |            |       |      |                     |
| 27 | Regain my independence                      |            |          |            |       |      |                     |

## Appendix 2. Final Version Patient Benefit Assessment Scale

### Hospitalisation Goals

People differ in what they wish to achieve with a hospitalisation. They have different goals. This depends on what they suffer from, what they are hospitalised for, and what they find important in life.

I am now going to mention some subjects that may be important to you during this hospitalisation. Can you say whether each applies to you?

A subject applies to you if you experience or anticipate problems or limitations and this applies to your life. For people who, for example, are short of breath, the subject shortness of breath probably applies, but not for others. For others they may be struggling to enjoy life because of their illness, but if you experience no problems with it, then this doesn't apply to you.

*Instruction for the interviewer: Circle the number for the subject that applies to the participant.*

*If a participant asks what you mean by a subject, say:*

*Are you experiencing problems with [subject] now, or when you were admitted, or are you expecting problems with it because of your illness or hospitalisation?*

*For the functional subjects, prefer not to use the word 'problem', but rather 'trouble' or 'limitation'.*

Now follow the subjects, you should indicate whether each subject applies to you or not:

1. Wanting to feel better

*Explanation if necessary: do you feel sick or miserable and would you like to feel better?*

2. Energy

3. Pain

4. Bowel movements

5. Shortness of breath

6. Walking

7. Appetite

8. Unclear about what is wrong with me

*Explanation if necessary: you may be wondering what is wrong with you. If this was already clear for you when you were admitted then this does not apply.*

9. Controlling my disease

*Explanation if necessary: Do you suffer from a disease that needs to be controlled?*

10. Remain alive

*Explanation if necessary: Was your life in danger when you were admitted or do you think that this hospitalisation must contribute to remain alive?*

11. Enjoying life

12. Housework

13. Groceries

14. Washing and dressing myself

15. Gardening

16. Exercise or Sports

17. Hobbies

18. Driving

19. Going on outings

20. Visiting family or friends



1  
2  
3 21. Return back to my home

4 *Explanation if necessary: Are you unsure whether you can return to your own home?*

5  
6 22. Independence

7 23. Are there other themes which are important to you during this hospitalisation that I have not  
8 mentioned yet? If so, which?  
9

10  
11 Now that we have identified the themes that apply to you, I am going to ask to what extent they are  
12 goals during this hospitalisation.  
13

14  
15 Can you indicate for each goal that I mention how important it is during this hospitalisation? You can  
16 choose from 'not at all important', 'moderately important' 'quite important', or 'very important'.  
17

18  
19 For some goals you may still say that they do not apply, for example because they do not matter  
20 during this hospitalisation. Then you indicate "does not apply to me now".  
21

22  
23 *Instruction to interviewer: Read only the goals which you have circled.*  
24  
25  
26  
27  
28  
29  
30  
31  
32  
33  
34  
35  
36  
37  
38  
39  
40  
41  
42  
43  
44  
45  
46  
47  
48  
49  
50  
51  
52  
53  
54  
55  
56  
57  
58  
59  
60

|    |                                                                                                                   | does<br>not apply<br>to me now | not at all<br>important  | somewhat<br>important    | quite<br>important       | very<br>important        |
|----|-------------------------------------------------------------------------------------------------------------------|--------------------------------|--------------------------|--------------------------|--------------------------|--------------------------|
| 1  | How important is it for you that you <b>feel better again</b> as a result of this hospitalisation                 | <input type="checkbox"/>       | <input type="checkbox"/> | <input type="checkbox"/> | <input type="checkbox"/> | <input type="checkbox"/> |
| 2  | How important is it for you that you <b>have more energy</b> as a result of this hospitalisation                  | <input type="checkbox"/>       | <input type="checkbox"/> | <input type="checkbox"/> | <input type="checkbox"/> | <input type="checkbox"/> |
| 3  | How important is it for you that you <b>have less pain</b> as a result of this hospitalisation                    | <input type="checkbox"/>       | <input type="checkbox"/> | <input type="checkbox"/> | <input type="checkbox"/> | <input type="checkbox"/> |
| 4  | How important is it for you that you <b>have normal bowel movements again</b> as a result of this hospitalisation | <input type="checkbox"/>       | <input type="checkbox"/> | <input type="checkbox"/> | <input type="checkbox"/> | <input type="checkbox"/> |
| 5  | How important is it for you that you <b>are less short of breath</b> as a result of this hospitalisation          | <input type="checkbox"/>       | <input type="checkbox"/> | <input type="checkbox"/> | <input type="checkbox"/> | <input type="checkbox"/> |
| 6  | How important is it for you that you can <b>walk better again</b> as a result of this hospitalisation             | <input type="checkbox"/>       | <input type="checkbox"/> | <input type="checkbox"/> | <input type="checkbox"/> | <input type="checkbox"/> |
| 7  | How important is it for you that you <b>regain your appetite</b> as a result of this hospitalisation              | <input type="checkbox"/>       | <input type="checkbox"/> | <input type="checkbox"/> | <input type="checkbox"/> | <input type="checkbox"/> |
| 8  | How important is it for you that you <b>know what is wrong with you</b> as a result of this hospitalisation       | <input type="checkbox"/>       | <input type="checkbox"/> | <input type="checkbox"/> | <input type="checkbox"/> | <input type="checkbox"/> |
| 9  | How important is it for you that <b>your disease is under control</b> as a result of this hospitalisation         | <input type="checkbox"/>       | <input type="checkbox"/> | <input type="checkbox"/> | <input type="checkbox"/> | <input type="checkbox"/> |
| 10 | How important is it for you that you <b>remain alive</b> as a result of this hospitalisation                      | <input type="checkbox"/>       | <input type="checkbox"/> | <input type="checkbox"/> | <input type="checkbox"/> | <input type="checkbox"/> |
| 11 | How important is it for you that you can <b>enjoy life again</b> as a result of this hospitalisation              | <input type="checkbox"/>       | <input type="checkbox"/> | <input type="checkbox"/> | <input type="checkbox"/> | <input type="checkbox"/> |
| 12 | How important is it for you that you can <b>do housework again</b> as a result of this hospitalisation            | <input type="checkbox"/>       | <input type="checkbox"/> | <input type="checkbox"/> | <input type="checkbox"/> | <input type="checkbox"/> |

1  
2  
3  
4  
5  
6  
7  
8  
9  
10  
11  
12  
13  
14  
15  
16  
17  
18  
19  
20  
21  
22  
23  
24  
25  
26  
27  
28  
29  
30  
31  
32  
33  
34  
35  
36  
37  
38  
39  
40  
41  
42  
43  
44  
45  
46

|    |                                                                                                                                 | does not apply to me now | not at all important     | somewhat important       | quite important          | very important           |
|----|---------------------------------------------------------------------------------------------------------------------------------|--------------------------|--------------------------|--------------------------|--------------------------|--------------------------|
| 13 | How important is it for you that you can <b>do the groceries again</b> as a result of this hospitalisation                      | <input type="checkbox"/> | <input type="checkbox"/> | <input type="checkbox"/> | <input type="checkbox"/> | <input type="checkbox"/> |
| 14 | How important is it for you that you <b>can wash and dress yourself again</b> as a result of this hospitalisation               | <input type="checkbox"/> | <input type="checkbox"/> | <input type="checkbox"/> | <input type="checkbox"/> | <input type="checkbox"/> |
| 15 | How important is it for you that you <b>can garden again</b> as a result of this hospitalisation                                | <input type="checkbox"/> | <input type="checkbox"/> | <input type="checkbox"/> | <input type="checkbox"/> | <input type="checkbox"/> |
| 16 | How important is it for you that you <b>can exercise or participate in sports again</b> as a result of this hospitalisation     | <input type="checkbox"/> | <input type="checkbox"/> | <input type="checkbox"/> | <input type="checkbox"/> | <input type="checkbox"/> |
| 17 | How important is it for you that you <b>can exercise your hobbies again</b> as a result of this hospitalisation                 | <input type="checkbox"/> | <input type="checkbox"/> | <input type="checkbox"/> | <input type="checkbox"/> | <input type="checkbox"/> |
| 18 | How important is it for you that you <b>can drive again</b> as a result of this hospitalisation                                 | <input type="checkbox"/> | <input type="checkbox"/> | <input type="checkbox"/> | <input type="checkbox"/> | <input type="checkbox"/> |
| 19 | How important is it for you that you <b>go on outings again</b> as a result of this hospitalisation                             | <input type="checkbox"/> | <input type="checkbox"/> | <input type="checkbox"/> | <input type="checkbox"/> | <input type="checkbox"/> |
| 20 | How important is it for you that you <b>can visit family or friends again</b> as a result of this hospitalisation               | <input type="checkbox"/> | <input type="checkbox"/> | <input type="checkbox"/> | <input type="checkbox"/> | <input type="checkbox"/> |
| 21 | How important is it for you that you <b>can return to your own home again</b> as a result of this hospitalisation               | <input type="checkbox"/> | <input type="checkbox"/> | <input type="checkbox"/> | <input type="checkbox"/> | <input type="checkbox"/> |
| 22 | How important is it for you that you <b>regain your independence</b> as a result of this hospitalisation                        | <input type="checkbox"/> | <input type="checkbox"/> | <input type="checkbox"/> | <input type="checkbox"/> | <input type="checkbox"/> |
| 23 | How important is it for you that you _____ as a result of this hospitalisation                                                  | <input type="checkbox"/> | <input type="checkbox"/> | <input type="checkbox"/> | <input type="checkbox"/> | <input type="checkbox"/> |
| 24 | Do you have any goals I haven't mentioned yet? If so: How important is it to you that _____ as a result of this hospitalisation | <input type="checkbox"/> | <input type="checkbox"/> | <input type="checkbox"/> | <input type="checkbox"/> | <input type="checkbox"/> |

### Evaluation of hospitalisation goals

In the beginning of your hospitalisation you indicated how important various goals for you were. A goal is something you want to achieve with a hospitalisation. Some goals you may have achieved, others maybe not or not entirely.

Can you indicate for each of the goals below how much the hospitalisation has helped to achieving the goal? You can indicate whether the hospitalisation has helped you 'not at all', 'moderately', 'quite', or 'completely'.

*Only the goals which applied at baseline are evaluated with the participant.*

|    |                                                                           | Not at all               | Somewhat                 | Quite                    | Completely               |
|----|---------------------------------------------------------------------------|--------------------------|--------------------------|--------------------------|--------------------------|
| 1  | Because of the hospitalisation I <b>feel better again</b>                 | <input type="checkbox"/> | <input type="checkbox"/> | <input type="checkbox"/> | <input type="checkbox"/> |
| 2  | Because of the hospitalisation I have <b>more energy</b>                  | <input type="checkbox"/> | <input type="checkbox"/> | <input type="checkbox"/> | <input type="checkbox"/> |
| 3  | Because of the hospitalisation I have <b>no more pain</b>                 | <input type="checkbox"/> | <input type="checkbox"/> | <input type="checkbox"/> | <input type="checkbox"/> |
| 4  | Because of the hospitalisation I have <b>normal bowel movements again</b> | <input type="checkbox"/> | <input type="checkbox"/> | <input type="checkbox"/> | <input type="checkbox"/> |
| 5  | Because of the hospitalisation I am <b>less short of breath</b>           | <input type="checkbox"/> | <input type="checkbox"/> | <input type="checkbox"/> | <input type="checkbox"/> |
| 6  | Because of the hospitalisation I <b>walk better again</b>                 | <input type="checkbox"/> | <input type="checkbox"/> | <input type="checkbox"/> | <input type="checkbox"/> |
| 7  | Because of the hospitalisation I <b>regained appetite</b>                 | <input type="checkbox"/> | <input type="checkbox"/> | <input type="checkbox"/> | <input type="checkbox"/> |
| 8  | Because of the hospitalisation I <b>know what is/ was wrong with me</b>   | <input type="checkbox"/> | <input type="checkbox"/> | <input type="checkbox"/> | <input type="checkbox"/> |
| 9  | Because of the hospitalisation <b>my disease is under control</b>         | <input type="checkbox"/> | <input type="checkbox"/> | <input type="checkbox"/> | <input type="checkbox"/> |
| 10 | Because of the hospitalisation I <b>remained alive</b>                    | <input type="checkbox"/> | <input type="checkbox"/> | <input type="checkbox"/> | <input type="checkbox"/> |
| 11 | Because of the hospitalisation I <b>enjoy life again</b>                  | <input type="checkbox"/> | <input type="checkbox"/> | <input type="checkbox"/> | <input type="checkbox"/> |
| 12 | Because of the hospitalisation I <b>do my housework again</b>             | <input type="checkbox"/> | <input type="checkbox"/> | <input type="checkbox"/> | <input type="checkbox"/> |
| 13 | Because of the hospitalisation I <b>do the groceries again</b>            | <input type="checkbox"/> | <input type="checkbox"/> | <input type="checkbox"/> | <input type="checkbox"/> |
| 14 | Because of the hospitalisation I <b>wash and dress myself again</b>       | <input type="checkbox"/> | <input type="checkbox"/> | <input type="checkbox"/> | <input type="checkbox"/> |
| 15 | Because of the hospitalisation I <b>garden again</b>                      | <input type="checkbox"/> | <input type="checkbox"/> | <input type="checkbox"/> | <input type="checkbox"/> |
| 16 | Because of the hospitalisation I <b>participate in sports again</b>       | <input type="checkbox"/> | <input type="checkbox"/> | <input type="checkbox"/> | <input type="checkbox"/> |

1  
2  
3  
4  
5  
6  
7  
8  
9  
10  
11  
12  
13  
14  
15  
16  
17  
18  
19  
20  
21  
22  
23  
24  
25  
26  
27  
28  
29  
30  
31  
32  
33  
34  
35  
36  
37  
38  
39  
40  
41  
42  
43  
44  
45  
46

|    |                                                                       | Not at all               | Somewhat                 | Quite                    | Completely               |
|----|-----------------------------------------------------------------------|--------------------------|--------------------------|--------------------------|--------------------------|
| 17 | Because of the hospitalisation I <b>can resumed my hobbies</b>        | <input type="checkbox"/> | <input type="checkbox"/> | <input type="checkbox"/> | <input type="checkbox"/> |
| 18 | Because of the hospitalisation I <b>drive again</b>                   | <input type="checkbox"/> | <input type="checkbox"/> | <input type="checkbox"/> | <input type="checkbox"/> |
| 19 | Because of the hospitalisation I <b>go on outings again</b>           | <input type="checkbox"/> | <input type="checkbox"/> | <input type="checkbox"/> | <input type="checkbox"/> |
| 20 | Because of the hospitalisation I <b>visit family or friends again</b> | <input type="checkbox"/> | <input type="checkbox"/> | <input type="checkbox"/> | <input type="checkbox"/> |
| 21 | Because of the hospitalisation I <b>am back in my own home</b>        | <input type="checkbox"/> | <input type="checkbox"/> | <input type="checkbox"/> | <input type="checkbox"/> |
| 22 | Because of the hospitalisation I <b>regained independence</b>         | <input type="checkbox"/> | <input type="checkbox"/> | <input type="checkbox"/> | <input type="checkbox"/> |
| 23 | Because of the hospitalisation _____                                  | <input type="checkbox"/> | <input type="checkbox"/> | <input type="checkbox"/> | <input type="checkbox"/> |
