# Supplementary material for: Development of a new tool for the assessment of patient-defined benefit in hospitalised older patients: the Patient Benefit Assessment Scale for Hospitalised Older Patients (P-BAS HOP)
Source: PubMed Central journal article supplement (PMC7684819; doi:10.1136/bmjopen-2020-038203), 2020-11-23
Supplement: bmjopen-2020-038203supp001.pdf [file bmjopen-2020-038203supp001.pdf]

**Appendix 1. Version 1. Patient Benefit Assessment Scale****Hospitalisation goals**

The following questions cover how important the goals below are for you during your current hospitalisation.

Can you indicate how important each goal below is for you? You can choose from: 'not at all', 'somewhat', 'moderately' 'quite', or 'very'. If a goal doesn't apply to you, for example because you don't have difficulty with the listed problem (for example with bowel movements, or shortness of breath) or because you don't have a garden, then choose 'does not apply to me'.

|    | How important is it for you that through this hospitalisation... | Not at all | Somewhat | Moderately | Quite | Very | Does not apply to me |
|----|------------------------------------------------------------------|------------|----------|------------|-------|------|----------------------|
| 1  | You feel better                                                  |            |          |            |       |      |                      |
| 2  | You regain weight                                                |            |          |            |       |      |                      |
| 3  | Your condition improves                                          |            |          |            |       |      |                      |
| 4  | You have more energy                                             |            |          |            |       |      |                      |
| 5  | You can walk better                                              |            |          |            |       |      |                      |
| 6  | You move easier                                                  |            |          |            |       |      |                      |
| 7  | You can do housework                                             |            |          |            |       |      |                      |
| 8  | You can cook                                                     |            |          |            |       |      |                      |
| 9  | You can do the groceries                                         |            |          |            |       |      |                      |
| 10 | You can garden                                                   |            |          |            |       |      |                      |
| 11 | You can take pleasure in eating                                  |            |          |            |       |      |                      |
| 12 | You can wash and dress yourself                                  |            |          |            |       |      |                      |
| 13 | You can exercise or participate in sports                        |            |          |            |       |      |                      |
| 14 | You have no pain                                                 |            |          |            |       |      |                      |
| 15 | You have normal bowel movements                                  |            |          |            |       |      |                      |
| 16 | You have less shortness of breath                                |            |          |            |       |      |                      |
| 17 | Your disease is under control                                    |            |          |            |       |      |                      |
| 18 | You remain alive                                                 |            |          |            |       |      |                      |
| 19 | You can enjoy life                                               |            |          |            |       |      |                      |
| 20 | You regain your freedom                                          |            |          |            |       |      |                      |
| 21 | You can resume your (volunteer) work                             |            |          |            |       |      |                      |
| 22 | You can go on outings                                            |            |          |            |       |      |                      |
| 23 | You can visit friends or family                                  |            |          |            |       |      |                      |
| 24 | You can take a short break                                       |            |          |            |       |      |                      |
| 25 | You know the cause of your complaints                            |            |          |            |       |      |                      |
| 26 | You can go back home                                             |            |          |            |       |      |                      |
| 27 | You regain your independence                                     |            |          |            |       |      |                      |

**Evaluation of hospitalisation goals**

In the beginning of your hospitalisation you indicated how important various goals for you were. Can you indicate for each of the goals below how much the hospitalisation has helped to achieving the goal? You can indicate whether the hospitalisation helped you 'not at all', 'somewhat', 'moderately' 'quite', or 'very'. If a goal didn't apply to you, for example because you didn't have difficulty with the listed problem (for example with bowel movements, or shortness of breath) or because you have no garden, then choose 'did not apply to me'.

|    | The hospitalisation helped me to...         | Not at all | Somewhat | Moderately | Quite | Very | Did not apply to me |
|----|---------------------------------------------|------------|----------|------------|-------|------|---------------------|
| 1  | Feel better                                 |            |          |            |       |      |                     |
| 2  | Regain weight                               |            |          |            |       |      |                     |
| 3  | Improve my condition                        |            |          |            |       |      |                     |
| 4  | Have more energy                            |            |          |            |       |      |                     |
| 5  | Walk better                                 |            |          |            |       |      |                     |
| 6  | Move easier                                 |            |          |            |       |      |                     |
| 7  | Do the housework                            |            |          |            |       |      |                     |
| 8  | Cook                                        |            |          |            |       |      |                     |
| 9  | Do the groceries                            |            |          |            |       |      |                     |
| 10 | Garden                                      |            |          |            |       |      |                     |
| 11 | Take pleasure in eating                     |            |          |            |       |      |                     |
| 12 | Wash and dress myself                       |            |          |            |       |      |                     |
| 13 | Exercise or Participate in sports           |            |          |            |       |      |                     |
| 14 | Have no pain                                |            |          |            |       |      |                     |
| 15 | Have normal bowel movements                 |            |          |            |       |      |                     |
| 16 | Have less shortness of breath               |            |          |            |       |      |                     |
| 17 | Keep my disease under control               |            |          |            |       |      |                     |
| 18 | Remain alive                                |            |          |            |       |      |                     |
| 19 | Enjoy life                                  |            |          |            |       |      |                     |
| 20 | Regain my freedom                           |            |          |            |       |      |                     |
| 21 | Resume my volunteer work                    |            |          |            |       |      |                     |
| 22 | Go on outings                               |            |          |            |       |      |                     |
| 23 | Visit family or friends                     |            |          |            |       |      |                     |
| 24 | Can take a short break                      |            |          |            |       |      |                     |
| 25 | Know what the cause of my complaints is/was |            |          |            |       |      |                     |
| 26 | Go back to my home                          |            |          |            |       |      |                     |
| 27 | Regain my independence                      |            |          |            |       |      |                     |
